# Supplementary material for: Phagocytosis-initiated tumor hybrid cells acquire a c-Myc-mediated quasi-polarization state for immunoevasion and distant dissemination
Source: Nat Commun. 2023 Oct 17;14:6569. doi: 10.1038/s41467-023-42303-5 (PMC10582093; doi:10.1038/s41467-023-42303-5)
Supplement: Supplementary file 4 — Source Data [file 41467_2023_42303_MOESM4_ESM.xlsx]

## Sheet: Fig.1c
Fig. 1c. Western blotting analysis of CD47 expression levels in three human prostate cancer cell lines
CD47/GAPDH			Normalize to C4-2
C4-2	22Rv1	DU145	C4-2	22Rv1	DU145
0.634503	1.37656	1.75711	1.15462	2.50495	3.19745
0.50662	0.900397	1.66779	0.921905	1.63847	3.0349
0.507486	1.09901	1.64417	0.92348	1.99988	2.99192

## Sheet: Fig.1e
Fig. 1e. Percentage of THCs per total vital cells in different co-culture models at different time points.
	C4-2+U937 MF					C4-2+primary MF
	2h	72h	168h			2h	72h	168h
THC %	1.56026	26.9805	50.7216		THC %	2.27336	3.63183	16.2967
	1.28148	25.6587	49.004			2.74361	3.21775	12.0257
	1.8326	26.4833	50.0911			2.32236	3.60389	13.5213
	22Rv1+U937 MF					22Rv1+primary MF
	2h	72h	168h			2h	72h	168h
THC %	0.806598	9.6172	23.3041		THC %	0.424056	0.54932	0.492641
	0.50409	9.94055	22.8563			0.418125	0.415721	0.353991
	0.918056	9.35619	21.248			0.398718	0.616734	0.418814
	DU145+U937 MF					Du145+primary MF
	2h	72h	168h			2h	72h	168h
THC %	0.686658	3.53656	12.5417		THC %	1.44811	1.67353	1.67896
	0.574116	3.33503	11.764			1.31758	1.76891	1.60081
	0.821683	4.40234	11.8542			0.867417	1.72178	1.80857

## Sheet: Fig.1f
Fig. 1f. Percentage of THCs in 3-day co-cultures of U937 macrophages and CD47 overexpressed cells.
	U937 MF+C4-2 ctrl	U937 MF+C4-2 CD47 knock-in
THC %	29.6845	23.3811
	29.9323	22.4096
	30.1744	22.786

## Sheet: Fig.1g
Fig. 1g. Percentage of THCs in 3-day co-cultures of U937 macrophages and CD47 knockdown cells.
	22Rv1				DU145
	Ctrl	Knock-down			Ctrl	Knock-down
THC %	5.04308	5.2176		THC %	2.42947	2.80198
	4.17334	5.55377			2.44812	2.79228
	4.5669	5.38541			2.42429	2.80122

## Sheet: Fig.1h
Fig. 1h. APC_BCL-2 expression (log10) in the co-cultured cells
U937 MF	THC	C4-2
2.6599	3.4694	2.35764
2.80033	3.35166	2.289
2.45687	2.92588	2.33175
2.52336	2.9499	2.30953
2.48376	3.29676	2.84948
2.98309	3.20935	2.36837
2.72682	2.80321	2.69499
3.21909	2.64383	2.5506
2.50919	2.75369	3.61866
2.49932	3.28518	2.93155
3.14661	3.20368	2.95311
2.52406	2.55515	3.07558
2.19314	2.94756	2.62283
2.50422	3.25496	3.15692
2.70254	3.12054	3.66076
2.72822	2.63881	3.34446
2.26538	3.24959	3.1679
2.92233	2.97393	2.62511
3.15154	2.82453	2.54935
2.61106	3.29009	2.65183
2.3694	3.47544	2.97892
2.66674	3.394	3.31465
3.13624	2.76449	3.14486
2.80449	2.88359	4.23219
2.77294	3.18608	3.37522
2.38878	2.52798	3.20108
2.37866	3.30941	3.03317
2.31305	2.66576	3.55029
2.18915	2.59078	3.39786
2.83604	2.88619	3.48593
2.47014	2.91939	2.85335
2.62124	2.85533	3.76346
2.84757	2.52628	2.51889
2.01385	2.63996	2.64603
3.20433	2.84854	2.58493
2.53681	2.63738	2.55036
2.6187	2.73448	3.78082
2.88269	3.02228	3.86007
2.35945	2.52209	2.92814
2.67909	3.08864	2.80067
2.33206	3.03393	3.60401
2.43223	2.7429	3.50445
2.67857	3.17374	4.35181
2.88628	2.84475	3.77315
2.21317	3.24054	2.63117
2.76179	2.638	3.96606
2.60638	3.18282	2.44524
2.93458	3.1216	2.48523
2.9256	3.05004	2.68825
2.89022	2.62511	3.51124
2.48677	2.77873	2.64883
2.58965	2.94961	2.67159
2.58684	3.07559	3.41183
2.82224	3.31885	3.26647
2.31581	3.29533	4.02157
2.9868	3.65716	2.56799
2.37929	2.98877	2.97535
2.36332	2.4947	3.61365
2.3375	2.73991	3.39816
2.73277	3.43563	3.26047
2.11888	2.86314	2.75218
2.71857	3.08211	2.19876
2.80254	3.04697	2.309
2.7759	3.14211	2.46694
2.43722	3.07442	2.99671
3.36482	3.29152	3.06852
2.83416	2.8987	2.7012
2.77149	3.129	2.87173
2.57465	2.84576	3.42929
2.63547	2.90729	3.69716
2.47447	2.57922	4.01186
2.62594	2.86004	3.07395
2.42444	2.6136	3.18775
2.99968	2.68514	3.12962
2.84601	3.38377	2.20801
2.66156	3.0143	3.21422
3.035	3.14621	3.12115
2.42379	2.68319	3.22144
2.26287	2.81048	2.98452
2.7459	2.80338	3.11262
2.74174	2.8382	2.90816
2.32095	3.17834	3.08388
2.67307	3.19848	2.31896
2.09723	3.28874	3.61676
2.2947	3.07088	2.68365
2.6332	2.94608	2.92079
3.02265	3.06226	3.17436
2.51805	3.02733	3.00385
2.71849	2.56226	2.5107
2.46613	2.77094	3.48365
2.14916	3.19966	2.88906
2.71251	2.71417	2.37189
2.8055	3.2186	3.49552
2.65795	2.96871	2.97714
1.98685	2.75539	2.70319
2.76164	3.42274	2.63292
2.24211	2.95362	2.44908
2.48411	3.40535	3.48287
2.81867	2.8173	3.35457
3.00707	2.58575	3.40624
2.52113	3.30365	2.71834
1.99732	3.40013	3.40922
3.01693	3.14309	3.13985
2.85742	3.2555	2.80584
2.97444	2.89723	3.24142
2.38647	2.82824	3.10265
2.87305	3.09292	3.68938
2.79524	2.83726	3.51739
2.84284	3.37645	2.85539
2.76201	3.11816	2.89805
2.53546	2.94937	3.50137
2.88345	2.86504	3.22596
2.45978	3.23229	3.39232
2.52215	3.4092	3.15445
2.51083	2.87646	2.59099
2.74813	3.04826	2.68357
2.6196	2.79448	1.2424
2.8118	2.79955	2.6319
3.18633	2.8022	3.55314
2.60716	3.37942	2.75776
2.34287	3.48951	2.45971
2.78214	2.98545	2.73689
2.66192	3.00882	2.57755
2.97382	3.23726	3.08762
2.67857	2.89016	2.85745
2.77787	2.86653	2.67403
2.67711	3.28268	2.56833
2.41872	3.48593	2.7328
2.35342	2.82295	3.17958
2.58422	2.70856	2.64687
2.34337	2.88964	2.06609
3.0084	3.09826	2.93503
2.56662	2.63446	3.27998
2.35716	2.89437	2.38182
2.8472	2.91921	2.66961
2.48165	3.03863	2.7298
2.44027	3.16682	2.84723
2.52017	2.91012	4.02984
2.83059	2.80121	2.77672
2.95801	3.21391	3.07026
2.89959	3.36135	3.36697
2.62084	2.9705	2.656
2.66855	2.94432	2.93177
2.89685	2.83789	3.7963
3.2043	2.97062	2.63996
2.7725	2.77766	2.79147
2.67163	3.00669	3.28208
3.26491	2.8225	2.52151
2.76582	2.71224	3.08827
2.65458	3.1933	2.77272
2.74181	3.15219	3.84333
2.51292	2.98687	2.35573
2.32448	2.84272	2.02029
2.83726	2.93525	2.87409
2.39336	3.25002	2.79832
3.21259	2.87629	3.34019
2.54899	3.53667	2.60783
3.09314	2.80328	2.32695
2.71094	3.00868	3.23885
2.83444	2.85575	3.69837
2.91521	3.05578	2.14553
2.38182	3.39512	2.08698
2.64345	2.90708	3.5267
2.57252	2.84582	3.76386
2.57705	3.00408	3.02677
2.45439	2.95666	3.25892
2.96119	3.14369	2.90489
3.18806	3.37408	2.55533
2.26299	3.16927	2.19455
2.67667	3.0181	2.93064
2.88359	2.91328	2.89217
2.73877	3.09062	3.47969
2.35831	2.52723	2.93495
2.46796	2.86487	2.94466
2.60186	3.355	2.89201
2.0304	3.04045	2.94987
2.61789	2.71593	3.28316
2.90774	2.90769	3.49161
2.69412	2.87683	3.40163
2.6478	3.34567	3.00617
2.37529	2.59538	2.83021
2.42888	2.98594	3.05797
2.43319	2.66541	2.81769
2.57353	3.01232	2.36735
2.87052	2.66192	2.84836
2.56203	2.43509	3.23488
2.71557	2.98799	2.99173
2.67272	2.86846	2.66563
2.07852	2.86881	3.30895
2.67128	2.75381	3.1376
3.00428	3.10224	3.23838
3.16675	2.7843	2.24687
2.99656	2.9988	2.71066
3.07043	3.11086	2.76615
2.91755	2.89647	2.85
2.51103	3.61646	2.37675
2.77225	3.36195	2.88094
2.65059	2.85754	3.2068
2.78065	3.13687	3.2696
2.63748	3.0284	3.46874
2.73258	2.64397	2.74112
2.85446	2.91102	3.00157
2.65809	3.16113	3.4016
2.91994	3.35575	2.43682
2.31802	2.74698	1.83448
2.57201	3.01044	3.18804
2.90566	3.20752	2.55203
2.34208	2.36902	3.17316
2.50428	2.92381	2.25182
3.15298	2.64948	2.71647
2.98472	3.30781	2.30295
2.2156	2.79248	3.04469
2.66394	3.01006	2.83328
2.38922	2.9775	2.2561
2.682	3.24186	3.60307
2.60514	2.87771	3.76033
2.6348	2.87423	2.53011
2.9339	2.67294	3.03775
2.89066	3.23008	2.72438
2.71655	2.92199	2.61259
2.98083	2.74064	2.73807
3.33598	2.89019	3.59166
1.51572	2.80077	3.20817
2.34711	2.73052	2.71318
2.31948	2.29236	3.31078
2.42175	3.50587	2.62035
2.8634	3.27009	2.97403
2.83585	2.57493	3.1998
2.79829	2.81625	2.6802
2.1982	3.23964	3.42857
3.08895	2.84683	2.91667
3.07344	2.96166	3.22254
2.41008	2.71452	2.35294
2.3	3.04888	3.86518
2.61905	2.78876	3.6007
2.73119	3.5385	3.07084
2.8544	2.87978	3.33975
2.64053	2.92156	2.40244
2.22711	2.69917	2.84851
3.14916	3.36391	2.62751
2.43008	3.18722	2.65275
2.6867	2.94678	2.92335
2.94688	3.08839	4.22696
2.737	2.98058	2.23101
3.05025	3.02005	2.90986
2.39701	2.79565	3.23522
1.95355	2.94515	2.6197
3.07828	2.66251	2.80392
2.30175	2.56347	2.66523
2.4125	3.14256	2.73737
2.67603	2.98667	2.67943
2.89875	2.70218	3.92755
2.85921	3.16915	2.71876
2.80875	3.05134	3.33022
3.03466	3.10547	3.05605
2.89377	3.25813	3.62545
3.02466	2.8052	2.87253
2.77294	3.37713	2.84942
2.45724	3.0303	2.75731
2.90178	3.06423	3.3498
2.61779	3.05309	2.60472
2.42241	3.2399	2.61945
2.69189	3.09423	3.41599
2.65215	2.82939	2.7118
2.94126	2.93463	2.95512
2.42036	3.12412	3.75967
2.64355	3.07626	3.41829
3.0463	2.65146	2.86918
2.63204	3.09235	3.38504
2.81144	3.20481	3.24954
2.39693	3.35565	2.65632
2.96748	3.02061	3.85543
2.71125	2.91144	2.53422
2.65614	2.69317	3.62545
2.55415	2.94207	2.79603
2.78876	2.71674	2.6859
2.59153	2.99013	3.69065
2.66536	2.64804	2.79992
2.69672	2.68157	2.96098
2.67172	2.96825	2.44808
2.55386	2.84037	3.64726
2.38451	2.99604	2.55356
2.82795	3.25011	3.17728
2.62717	3.1304	2.83362
2.30392	3.17632	2.86878
2.86918	2.97652	3.61756
2.77905	2.81177	3.23905
2.29214	2.93612	3.20174
2.80918	3.19491	3.40552
2.31305	2.88474	1.8897
2.56548	2.74343	3.15695
2.53018	2.73101	2.69713
3.32097	2.82398	2.82175
3.11756	3.41252	2.73299
2.90922	3.34518	2.94729
2.78126	3.22776	2.86697
2.29559	2.66102	2.78356
3.01641	3.17441	2.1937
2.46481	2.69126	3.51612
2.80186	3.11749	2.69844
2.61172	2.94498	3.27321
2.60452	2.9583	2.56364
2.57938	2.90253	3.71825
2.66767	3.00426	3.44727
2.78126	2.5006	3.04394
2.35032	3.1864	2.86372
2.60102	2.6686	3.10781
2.632	2.93195	3.63872
2.77801	3.01515	3.22935
2.49484	2.96609	2.62174
2.64345	3.20039	2.95754
3.34119	2.83132	2.93597
2.55761	2.97887	2.63843
2.5472	3.3245	2.70672
2.80496	3.19447	2.38612
2.80277	2.98563	3.6594
2.52305	2.87876	3.10973
2.54503	3.34695	2.95158
2.57482	2.91409	2.67207
2.72365	3.20767	3.26826
2.51083	3.01138	2.46883
2.40788	3.08145	2.59148
2.61233	3.05423	2.79386
2.74243	2.69317	3.60719
2.81352	2.99574	2.73295
2.28787	3.20529	3.47913
2.70991	3.01806	2.72784
2.8772	2.79606	2.78122
3.12884	2.97566	2.13266
2.70019	2.80778	3.82487
3.02401	3.32755	2.60612
2.87919	3.12346	3.70817
2.99448	2.75656	2.60275
3.18694	3.29209	3.50327
2.52955	2.7425	3.39171
2.70262	3.0696	3.26964
2.72708	3.03395	2.20555
2.53724	3.14058	2.63556
2.4769	3.01188	3.31282
2.74947	3.31372	2.7842
2.52723	2.89973	3.05941
2.99068	2.98018	3.42571
2.42896	3.04983	2.63489
2.69754	3.06862	3.30273
2.62545	2.90259	3.09927
2.20733	2.80868	3.16835
3.01075	3.22537	4.0965
2.51708	3.04525	3.64794
2.88409	3.12666	3.40522
2.60623	3.03902	2.68349
2.84451	3.13275	2.18035
2.76116	3.44497	3.18376
2.63843	3.43296	2.79999
2.30512	2.91364	2.9287
2.61243	2.80399	2.44369
2.71985	2.95105	3.04228
2.08037	2.83088	3.55974
3.12804	2.97818	2.93034
2.71471	3.11388	2.78743
2.24886	2.9569	3.17696
2.78575	2.78655	1.93678
2.42306	3.02856	3.14685
2.46326	3.18324	3.44118
2.66264	2.77694	2.99992
2.66228	2.73119	2.70234
2.36902	3.66633	2.82827
2.8057	3.42262	3.45639
2.90875	3.17884	3.29389
2.45574	3.10569	3.22934
2.6522	2.93577	1.94397
2.78813	2.92923	3.2156
2.4506	3.26798	3.65289
2.656	3.05555	3.27741
2.77705	2.89201	2.59908
2.34169	2.84497	3.10911
2.53011	2.53749	3.35582
2.6608	2.94673	2.98921
2.49484	2.9285	2.61507
2.70588	3.04811	2.29536
2.46598	3.21113	2.35935
2.74513	2.72507	3.41493
2.81938	2.80473	2.58981
2.88393	2.9323	2.41831
2.72863	3.34167	2.18151
2.36847	2.88114	2.40004
2.51689	2.81346	2.9432
2.83695	3.32592	3.17382
2.47447	3.06757	3.18113
2.50194	3.14498	2.84969
2.62599	3.04465	2.64242
2.6903	2.67132	2.83963
2.39449	2.64892	2.98474
2.94802	2.76843	2.48781
2.59617	3.0154	3.33162
2.72988	3.22419	2.76777
2.3512	3.38667	2.55024
2.58087	2.77662	2.72686
2.65845	2.75065	2.76213
2.60819	3.02539	2.9156
2.6199	2.93147	3.47157
2.45627	3.04131	3.11325
3.11334	2.84567	2.79825
2.38317	3.02551	3.11612
3.46393	3.07547	2.71923
3.20526	3.70526	3.23323
2.93165	2.76401	2.6765
2.63475	3.05079	2.92507
2.29024	2.80193	3.18166
2.32241	2.70311	2.57325
2.78837	2.71737	2.82926
2.56833	3.24385	2.93704
2.63393	3.02642	2.94094
2.6256	2.71086	3.25611
2.22238	3.01654	2.99002
2.96234	3.42553	3.54784
2.98857	3.0942	3.25996
2.47317	2.55948	2.57861
2.66143	3.16506	2.54726
2.98857	3.09973	2.28663
2.79078	2.60264	3.2618
2.85431	2.95517	2.73429
2.34984	2.66407	3.94848
3.28905	2.86662	2.89091
2.61553	3.04041	3.2236
3.00595	2.75392	2.87086
2.68938	3.11818	2.86081
2.12123	2.80395	3.19976
2.54177	2.98385	2.15354
2.47332	2.9319	2.9212
2.68471	3.13895	3.12602
2.58852	3.11695	2.6762
2.40738	3.08106	3.13845
2.64869	3.39931	3.68708
2.69408	2.88134	3.0968
2.32116	3.35538	2.93325
2.8795	3.35576	3.26309
3.04281	3.08259	3.46913
2.97953	2.75952	2.95626
2.48906	2.45559	2.5834
2.34603	2.91841	3.06135
2.69301	2.78865	2.44724
2.97966	2.81207	2.2196
2.14585	3.0139	2.3604
2.68867	3.12207	3.98578
2.20596	3.18282	2.95208
2.5966	2.73433	2.50721
2.89336	3.19607	3.49442
3.07137	3.13644	3.01058
2.46127	3.17333	2.55321
3.09945	3.45932	2.37088
2.61835	3.02324	3.06031
2.69205	2.60942	2.6759
2.31718	3.07572	2.62268
2.56674	3.13994	3.32055
2.56992	3.11302	2.99061
2.64901	2.84374	3.0847
2.44051	2.86328	3.53824
2.13786	2.93062	3.22652
2.64622	2.84647	3.0592
3.18059	2.98276	2.90336
2.71694	3.34025	2.79842
2.59255	3.25566	2.39797
3.0578	2.42428	2.37456
2.21277	3.19176	2.94649
2.78427	3.02277	2.23023
2.65764	3.0159	4.26761
2.77283	3.4042	3.02585
2.5958	3.08716	3.07876
2.95247	2.8762	3.64092
2.69585	3.07411	2.6281
2.76623	3.07879	3.28147
2.66474	3.02675	2.78423
2.72396	2.92857	2.88867
2.64697	2.77608	3.20161
2.57532	3.1314	2.4343
3.45889	2.83835	2.42509
2.34198	3.06442	2.67346
2.3854	2.69966	3.6074
2.41946	2.86799	3.01695
2.43263	2.84303	2.99422
2.28299	3.4302	2.56485
2.74272	3.18203	2.60819
2.85757	3.05992	3.40554
2.88493	3.0992	3.52185
2.56742	2.98229	3.08326
2.6935	2.68391	2.41872
3.35816	3.42396	2.73168
2.7409	2.81886	2.60519
2.19918	3.22692	2.87054
2.65677	3.18584	3.59071
2.30468	2.61769	2.97725
3.08842	2.93537	2.50019
2.40141	2.92341	2.60426
2.45567	3.04924	3.79385
3.19544	2.8925	3.48817
2.76689	3.15702	3.80708
2.37336	2.9968	3.28025
2.64883	3.31419	2.41342
2.67913	3.04432	2.47676
2.89179	3.20302	3.10863
2.70584	3.25435	3.29437
2.38451	3.16831	3.42224
2.76116	2.97946	2.96337
2.55468	2.62643	3.31004
2.789	2.71444	2.22185
2.63475	3.28905	3.08143
2.72894	2.97503	3.29097
2.56537	2.76012	2.88792
3.01849	2.99435	2.51553
2.75799	3.1688	3.54724
1.6125	2.68332	3.2041
3.0314	2.59287	3.08844
2.44938	3.09109	3.51593
2.54061	3.04	3.70915
2.50073	3.13552	3.30147
2.46613	2.90347	3.0291
2.03226	2.96154	3.64932
2.7609	3.08644	3.11056
2.63141	2.93119	2.85515
2.28127	2.89278	3.31185
2.43533	3.27404	3.55852
2.55556	2.88373	3.55305
2.95232	2.75754	3.19788
2.74943	3.08851	3.42841
3.09427	3.42534	2.67629
3.51195	2.79033	2.3392
2.5203	2.70327	2.79507
2.60993	2.83183	2.65012
2.72518	2.91073	3.35607
2.7575	2.96304	3.03288
2.89404	3.06053	2.73719
2.65165	3.23016	2.94843
2.7861	2.98753	3.30807
2.55315	2.98047	2.81717
2.65745	2.85006	3.21428
2.94893	3.07849	2.49932
2.78708	2.69454	2.6382
1.86313	2.76209	3.55488
2.7267	2.64603	2.17239
2.97851	2.55468	2.55492
2.22146	3.29229	2.29525
3.02612	2.90154	2.1468
2.86513	3.32086	3.29091
2.8579	2.82346	3.31412
2.95815	3.17918	2.85918
2.42208	2.90758	2.89016
2.86627	2.94537	2.76817
3.05806	4.01663	3.4176
2.70911	2.82744	3.29755
2.60901	2.47996	3.35338
2.30522	2.88092	2.40678
2.67529	2.72274	4.08979
2.53558	3.23735	2.71499
3.22561	2.41425	2.77058
2.19101	3.27045	3.07404
2.3252	3.02336	3.3066
2.62338	2.88875	3.23128
2.95978	3.05546	2.94954
2.20665	2.99956	3.04529
2.68838	3.26764	2.56737
2.47072	2.60685	2.65659
2.35139	2.81877	3.39635
2.6749	2.8128	2.77326
3.40576	3.10302	3.36737
3.23211	3.11384	2.9738
3.24099	2.67904	3.01658
2.22646	2.6029	2.85989
2.83277	3.07883	2.15772
2.82623	2.52735	2.64859
3.27928	3.03833	2.86481
2.23139	2.73781	2.24786
3.1731	2.76722	2.44385
2.87712	2.95595	3.48216
3.06371	2.96896	2.87976
2.19271	3.22124	3.03036
2.29169	2.68754	3.26927
2.01536	3.04403	2.62585
2.30175	2.58406	3.384
2.60165	2.86101	2.62119
2.64841	3.15541	3.20222
2.5933	2.87953	2.91186
2.98394	2.72999	2.77287
2.70051	2.85139	2.43894
2.76773	3.10017	3.2829
3.01788	2.88744	3.38448
2.76637	2.93455	3.01562
2.67255	2.93983	2.13753
2.42012	3.07845	2.65518
2.71962	3.22578	2.89019
2.29169	3.12385	3.71762
2.47754	3.02296	2.52999
2.51208	2.88892	3.29244
2.70652	3.03641	2.49796
2.77694	3.39739	3.30373
2.62466	2.64697	2.93064
2.61182	2.83315	2.93652
2.80453	2.89264	3.3608
3.13771	2.90059	2.79541
2.6856	2.73273	2.73987
2.80206	3.1689	3.04997
2.69097	3.18487	3.1942
2.7868	2.83344	2.7334
3.10323	2.69565	2.27966
2.57972	2.71058	2.52716
2.66603	2.93776	3.30379
3.21814	2.65741	3.8618
2.9618	3.27777	3.37062
2.86691	2.85793	3.20659
2.42403	2.97946	2.79369
2.24399	2.85063	3.14408
3.07673	2.7469	3.44107
2.97987	3.00595	3.12176
2.60741	2.97234	2.89696
1.94397	3.11463	3.47281
2.62293	2.7584	2.80641
2.65595	3.07947	2.78634
2.34984	2.97702	2.95877
2.53651	3.51822	2.39116
3.06784	3.02888	3.74385
3.13061	2.91776	3.0959
2.74832	2.93248	2.77712
2.52798	2.42387	3.0948
2.67546	3.24189	2.4155
2.17991	3.19473	2.81346
2.8311	3.21323	2.86446
2.36426	2.69929	3.53771
2.6918	3.05168	2.89187
2.5996	3.20781	3.16856
2.35716	2.61699	2.99267
3.1227	3.02822	3.58129
2.54869	3.20312	2.88255
2.76079	3.2564	3.75956
2.4801	2.91872	3.00061
2.31823	2.98978	2.79165
3.08756	2.54425	2.93751
2.88218	2.94408	3.44053
2.51325	3.2176	2.80463
3.22129	3.02163	3.36747
2.61573	2.55773	3.46862
2.57666	2.86898	3.50424
2.23139	2.92575	2.62069
2.88451	3.23808	2.65981
2.12987	3.31517	2.67468
3.06693	3.03042	2.62609
2.65618	3.05687	3.24639
2.69803	2.95483	3.29617
2.98923	2.75648	2.96325
2.20582	3.02745	2.87933
2.73381	2.74947	3.10562
2.49278	3.06228	3.36064
2.87848	2.40957	2.93036
2.69663	2.44846	2.57173
2.56439	2.96924	2.78058
2.81815	2.82814	2.58307
2.91831	3.35576	3.76395
2.7578	2.8185	2.70141
2.79158	2.78405	3.01654
2.62747	3.14389	2.41425
2.60602	3.06196	3.13293
3.13848	2.92397	3.28551
2.54407	3.29443	3.07397
2.93089	3.20435	3.21335
3.04401	2.88055	2.8576
2.72663	3.28932	2.6303
2.92621	3.16197	2.75377
2.2839	2.68024	1.99619
2.71405	3.28953	3.62369
2.92885	2.6817	2.60134
3.21704	3.03577	3.67955
2.4983	2.86604	3.24683
2.97421	3.07985	2.75377
2.49484	2.69155	2.73306
2.50548	2.49333	3.05148
2.46664	3.38572	3.22121
2.80681	2.90081	2.956
2.40864	2.91898	2.78659
2.6739	2.73859	2.4115
2.29359	2.88875	2.84291
2.62466	2.5903	2.66246
2.77719	2.64308	3.00193
2.946	3.34431	2.88258
2.62864	2.8858	3.48242
2.92558	3.16452	3.66808
2.44976	2.99402	3.11186
2.65477	3.43953	3.39039
2.57465	2.93971	2.99742
2.72077	3.04793	2.74552
3.00897	2.81938	3.30222
2.51397	3.19848	2.92637
2.87173	3.05119	3.00511
3.19403	2.83795	3.96928
2.79565	2.75802	2.53638
2.23768	3.29398	3.49764
2.08314	2.77482	3.02228
2.49735	3.21796	2.81625
2.68934	2.58846	2.8434
2.65022	2.74347	2.68909
2.97869	3.0533	3.10255
3.15957	2.94427	2.78504
2.42484	3.11338	2.56782
2.72212	2.71888	3.62608
2.84068	2.93659	2.67706
3.03411	2.56816	2.66749
2.63523	2.6088	2.76112
2.88148	2.77254	3.05487
2.39178	3.39759	3.11262
2.68174	3.33536	2.52539
2.75248	2.7825	3.58384
3.02079	2.70323	3.4759
2.6334	2.59855	2.70201
2.81001	2.58021	3.51142
2.8457	2.86756	2.48003
2.90763	3.18057	3.83357
2.57275	3.10264	2.99103
3.1494	2.88297	2.96744
2.50535	3.11292	2.64706
2.71996	2.91241	3.32794
2.51611	3.35451	2.71173
2.845	3.12131	2.59013
2.60389	3.30792	3.06768
2.39292	2.86595	2.7769
2.76766	3.05902	2.59596
3.19682	2.40864	3.28963
2.22	3.01084	2.53663
3.08395	3.1795	2.90116
3.37527	2.73239	3.51902
2.1088	3.21272	2.71853
2.77503	3.11282	3.15284
2.13053	3.08035	2.73142
3.01707	2.79836	3.26276
3.087	3.01608	3.031
2.44724	2.8188	2.5656
2.99136	2.74943	2.01299
2.63311	3.39274	3.38366
3.02044	2.74239	2.79589
2.42379	3.09766	2.9332
2.36819	3.23985	2.86057
2.46429	3.18059	3.07449
2.65003	2.87034	3.19437
2.8224	3.004	2.2937
1.9651	2.41475	2.99341
2.71814	3.10409	3.12364
2.80881	3.00509	3.30183
2.64383	2.65326	3.00946
2.51856	2.81425	2.6674
2.41773	3.0423	2.85166
2.64147	2.88842	2.62511
2.63364	3.06089	2.9874
2.74141	2.78925	3.03737
2.61689	2.99489	2.67814
2.44439	3.0118	2.65403
2.3366	2.81576	2.35052
2.66966	3.25628	3.57137
2.41658	3.06503	3.1222
2.24823	2.97202	2.84567
2.35477	3.00617	3.43044
2.41872	3.02928	3.37196
2.53626	2.65376	2.71078
2.45672	3.76855	2.76751
2.76313	2.84149	3.16189
2.74401	3.00882	2.71133
2.72358	2.83901	2.53105
2.92269	2.74836	2.74506
2.7729	2.62328	3.13497
2.83419	2.73481	3.10383
3.07279	3.02878	2.76663
2.62372	2.95505	3.08655
2.60819	3.37031	2.81068
2.69786	3.04271	3.01388
2.8298	2.68225	2.93759
2.64961	3.16869	2.954
2.16201	2.76589	2.83065
2.69404	2.85947	3.96008
3.03296	3.31311	2.60988
2.46767	3.15097	2.96997
2.52489	2.77069	2.58618
2.57549	3.01165	2.85479
2.48074	2.93488	3.37487
2.62722	3.48025	3.45851
2.56759	3.02077	3.09654
2.57297	3.27077	2.65188
2.39458	3.10483	2.15895
2.08771	3.14809	2.05739
2.82491	3.48377	2.66224
2.40004	2.95818	3.74267
2.6516	3.37997	3.06092
3.25574	3.03058	3.41627
2.56203	3.4036	2.57572
2.80988	3.07134	2.71744
2.74571	2.80088	3.14575
2.45257	3.27768	2.47533
2.32777	3.11971	2.35294
2.82195	2.80698	3.31473
3.10779	3.30407	2.74878
2.50187	3.3024	2.98119
2.86446	3.44565	2.65326
2.70278	2.77221	2.93483
2.72625	3.07822	2.89093
2.53496	3.22878	2.37152
3.21517	2.8746	2.82722
3.04924	3.19715	1.97303
2.24236	2.81622	2.62496
2.73377	2.72507	2.80858
2.70975	2.84662	2.56162
2.58667	3.03992	3.1181
2.92519	3.21388	2.61294
2.52955	3.38855	2.98609
3.36647	2.85048	2.86237
2.61492	3.31459	2.68518
2.70652	3.0626	3.03092
2.84309	2.79317	2.50747
2.90422	2.73961	2.28889
2.85596	2.90928	2.94332
2.76183	2.97507	3.25564
2.88488	3.04512	3.26752
2.19483	2.8587	2.91417
2.037	3.02688	3.36586
2.40278	2.94126	3.63396
2.07741	2.74567	3.36785
2.76164	2.99863	2.37492
2.39615	3.60541	3.34698
2.47382	2.70732	2.70031
2.61315	2.96068	2.94398
2.94229	2.78232	2.82751
2.86525	3.13333	2.79675
3.05155	2.64924	3.52383
2.82805	3.44697	2.78897
2.30076	2.81339	3.37298
2.6715	3.24532	3.47893
3.03583	2.58115	3.05174
2.30327	3.03351	2.76346
2.12023	2.42509	2.48586
2.06799	2.9996	3.12445
2.68556	3.36703	2.38433
2.81792	3.37785	2.7347
2.73965	2.7518	3.33805
2.62273	2.9663	2.83807
2.51605	2.88038	2.92048
2.74725	3.30417	3.28598
2.57504	3.1958	2.52558
2.56902	3.01411	2.75866
2.50187	2.55767	3.19787
2.39814	3.33684	3.81752
2.66438	2.9646	2.53823
2.75993	2.94469	2.79431
1.87974	3.27079	4.00805
2.49898	3.07303	3.26768
2.93575	2.999	2.48475
2.88306	2.99271	3.46871
2.8356	3.17098	2.71428
2.27759	3.04514	2.95773
2.51959	2.74279	3.85228
2.84857	3.00234	3.3339
3.04878	3.21883	3.53457
2.48088	3.23179	3.7376
2.99048	3.27091	3.04386
2.47014	3.00941	2.74265
2.69072	2.95884	2.70072
2.37254	3.17869	2.34945
2.50475	3.20171	2.67468
3.04291	2.80647	3.54091
2.84006	3.11654	2.49456
2.57314	2.73269	2.50528
2.39379	2.61482	3.13929
3.14955	3.12454	4.07337
2.75073	2.9614	3.27136
2.47504	3.06163	2.94386
2.26287	2.75618	2.68602
2.8376	2.9854	3.54077
2.85227	3.29814	2.35907
2.72856	3.07615	3.00517
2.63083	2.98108	3.05637
2.70931	2.78472	3.06505
2.3291	2.97112	2.41806
2.56209	2.90912	3.24526
2.94352	2.97352	2.75941
2.58949	2.78388	3.59277
2.84198	3.19496	2.16911
2.46156	2.86601	2.52139
2.42224	3.20921	2.35601
2.70149	3.00024	2.90526
2.64878	2.66908	2.74463
2.6913	2.57134	2.9024
2.20417	2.72066	3.29624
2.65017	3.46491	2.71101
2.75221	2.7951	2.84802
2.36295	3.09212	2.84414
3.02142	2.67224	2.62971
2.84438	2.7639	2.49504
2.49148	3.17326	2.7398
2.79379	2.72166	2.9254
1.97088	3.06436	2.84469
2.9421	2.90411	2.74663
2.22567	2.63059	2.69164
2.64827	3.02898	3.22332
2.91091	3.10948	3.03654
2.83021	2.6778	1.76587
2.87984	2.68191	4.09956
2.13559	3.18648	2.87919
2.20223	2.96444	3.41028
2.72346	3.21632	2.22093
2.67693	2.6528	3.20861
2.64486	2.45963	3.4642
3.11705	2.89636	3.42302
2.60222	3.34595	3.00453
2.79989	3.09366	2.52817
2.36651	2.91474	2.61299
2.39362	3.02118	2.36379
1.86528	2.91532	2.99221
2.88482	3.30931	2.59089
2.62348	3.22455	2.64496
2.3879	3.08862	2.93383
2.31496	2.93483	3.06989
2.69962	3.29356	2.76861
2.75058	3.15435	3.21169
2.86007	3.16246	3.1869
2.41309	2.99358	3.03649
2.56341	2.49395	3.34662
2.38701	2.90893	3.9295
2.40974	3.01643	2.72761
2.82153	2.72758	2.9714
2.64743	3.09397	3.32132
2.62864	3.23501	2.53155
2.34818	2.47662	3.00041
2.87288	3.19904	2.97822
2.36716	2.89371	3.09845
2.5212	2.85909	2.84622
2.41066	3.06819	2.50806
2.11001	2.81024	2.92079
3.14412	2.85311	3.1234
3.58263	2.60561	2.78069
3.12304	2.89976	2.86671
2.71173	2.41616	2.71911
2.31549	3.55853	2.93135
2.66062	2.83344	2.82738
2.71888	3.06744	2.52266
3.10032	3.18927	2.70512
2.89989	3.35363	2.93195
2.55386	3.24065	2.6257
2.65394	2.9772	4.25436
2.80375	3.11345	3.73087
2.75486	2.60175	3.25229
2.45182	2.99919	2.54612
2.1034	2.74144	3.8063
3.44089	2.5828	3.55905
2.97357	3.06477	3.4999
2.9784	3.17331	2.90617
2.54104	2.95872	2.44369
2.58922	2.68842	2.59866
2.39414	2.96423	2.25586
3.11771	3.09548	2.77182
3.10003	3.24243	2.40957
2.87919	2.84936	2.2792
2.91281	2.69741	3.27009
2.89459	3.11646	3.0017
2.71385	3.1452	2.69721
2.52457	2.89445	2.60436
2.7649	3.01044	3.16092
2.82282	3.3103	2.98731
2.25732	2.83132	2.62722
2.98164	3.06819	2.7632
2.95801	2.94591	3.58965
2.95288	2.65877	2.40313
2.82146	3.16953	2.86493
2.4056	2.93946	3.92926
2.3944	2.70816	3.30931
2.58803	2.81635	3.04016
2.41558	2.7144	3.04953
2.80409	2.94758	2.56719
2.96602	2.57043	2.86352
2.64171	3.4061	3.72644
2.47014	2.5737	2.90996
2.66066	3.11751	2.74959
2.22971	2.62412	3.35455
2.66354	3.127	2.42678
2.3397	3.08403	2.77054
2.8225	3.02553	2.71358
2.56041	2.78402	2.76253
2.86732	2.81204	3.47652
3.05873	2.76438	3.33138
3.14159	2.99934	2.77841
2.74909	3.47804	2.51004
3.0023	3.05936	2.79579
1.91905	3.05873	3.0321
2.28979	2.99831	2.55209
2.69659	2.69487	2.8346
3.17424	2.84866	2.26083
2.14187	3.33494	3.52502
3.06196	3.07745	2.5611
2.71314	2.87469	2.66625
2.73641	3.18949	2.70796
2.59447	3.44218	2.63924
2.60181	2.91623	2.73895
2.55327	3.38514	2.96984
2.97327	3.32841	3.01438
2.90928	2.87731	2.34701
2.63209	3.28824	2.65385
3.0987	3.00512	2.24736
2.98512	2.90986	3.50473
2.97316	3.2473	3.86597
2.72954	2.85808	3.1919
2.9751	3.12504	3.24516
2.6257	3.02761	2.56531
3.17904	2.92143	2.71725
2.72931	2.80003	2.93175
3.10913	2.74648	2.31728
2.93542	3.28031	2.66541
2.40098	3.3865	2.22932
2.63757	2.83947	2.65119
2.96481	2.96683	2.48955
2.17976	3.40009	2.79907
2.95969	2.96628	2.75727
2.6977	3.23849	2.62104
2.59787	3.44199	3.31463
2.58776	3.15781	3.12552
2.51488	2.9127	3.38524
2.4921	3.03631	3.00863
2.77884	2.76912	2.93545
2.70367	2.65913	2.89688
2.47868	3.20154	3.44307
2.7793	3.0994	2.77723
2.99426	3.16472	2.45083
2.80098	3.31305	2.57994
1.87348	3.01769	3.92607
2.23768	3.32986	4.13594
2.8506	3.41041	2.37134
2.68037	2.93303	3.34014
2.83704	2.7831	2.65809
2.67642	2.7347	3.04392
2.40738	2.86087	3.0319
2.7437	2.85977	3.60752
2.74082	3.24712	3.32173
2.81034	2.74185	3.05344
2.74409	2.79053	2.71362
2.54359	2.97126	2.54461
2.45068	3.21423	2.76409
2.59945	2.86193	2.46803
2.9102	3.19894	2.932
2.56941	2.49586	2.70528
2.91344	3.31809	2.73818
2.84121	2.68357	3.56315
2.55668	2.70315	2.87506
2.75252	3.05674	2.63427
2.76157	3.06705	2.57314
2.54243	3.20836	3.26213
2.4089	3.16035	2.45212
2.47647	3.09427	2.47404
2.2741	3.20392	4.69318
2.50033	3.11988	2.46008
2.88173	3.13927	2.61182
2.97643	2.86024	2.46525
2.55268	3.17389	2.70568
2.68234	2.97537	3.06847
3.148	2.97851	2.9359
2.6997	2.99729	2.36586
2.70951	3.10864	3.04049
2.86953	2.63523	2.54328
3.30619	2.36967	3.31647
2.72396	2.70116	2.84112
2.72788	3.00989	2.826
3.16619	3.12607	3.00623
2.70636	3.02622	3.06225
3.03094	2.929	2.82279
2.46149	2.81395	2.38092
2.55238	2.96813	3.25488
2.57241	3.1079	2.75937
2.55042	3.10218	2.65936
2.68522	3.07066	2.85677
2.84833	2.95084	1.97184
1.74489	3.06481	3.22696
3.0618	3.09447	3.34608
2.78374	2.46075	3.18857
3.08477	2.80951	3.30428
2.80071	2.71275	2.83476
2.5463	2.90121	3.03694
2.54183	3.28435	2.92035
2.95514	2.86846	3.32537
2.83535	2.98063	2.70488
2.61749	3.417	2.84536
2.3396	3.13702	2.93077
2.28481	2.80169	2.75415
2.22238	3.2454	2.79586
2.79527	3.41599	3.13949
2.96451	3.09139	1.60652
3.55044	3.05705	2.63877
3.03887	3.0312	2.27422
2.54104	3.34551	3.7306
2.9883	2.97108	3.66476
2.9854	3.42338	2.59924
2.19299	2.98587	3.13115
2.67917	2.92715	3.33898
2.81984	3.23207	3.66442
2.7124	2.79289	3.34277
2.57877	2.70112	3.64667
2.31114	2.90264	2.21707
2.9462	2.85257	2.89805
2.67516	3.11029	2.66291
2.69745	3.0534	3.28189
2.12491	2.657	3.1616
2.25268	3.02882	3.18231
2.66833	2.98879	3.23536
3.15357	2.7084	2.74057
2.77723	2.57043	2.60555
2.70875	2.92243	2.64161
2.42847	2.98363	3.07004
2.44066	2.95302	2.5852
2.63767	2.94522	2.74951
2.42517	2.76674	2.00334
2.21452	2.74482	2.67793
2.06051	2.76	2.49986
3.61449	2.8748	2.58054
2.42403	2.80054	2.19469
2.65559	2.62756	3.00958
2.54485	2.85808	2.72388
2.75825	3.19522	3.20998
2.68514	3.05359	2.712
2.28967	2.9059	3.46477
3.05249	2.56577	2.66456
2.93187	3.18779	3.38401
2.44237	3.20808	3.05372
2.61633	3.14531	2.56122
2.97793	2.8155	2.77171
2.51449	3.16976	2.98034
2.51779	3.28792	2.71279
2.41864	2.73928	3.33775
2.69205	2.56439	2.6697
2.67346	3.10635	2.51103
2.09151	3.07767	2.32241
2.82475	2.95507	2.77633
2.32011	2.89802	2.70927
2.68892	2.7474	2.27094
3.06103	3.09981	2.7572
2.53669	2.94153	2.71428
2.71318	3.14486	2.77446
2.85335	3.36191	2.77676
3.09264	3.20806	2.78501
2.75031	2.91818	2.25768
2.82856	2.6811	2.55802
2.6539	2.81431	3.08085
2.4692	2.94719	2.65536
2.59734	2.70064	3.08657
2.46385	3.04993	3.29005
2.92644	3.36954	3.00204
2.638	3.10884	2.71845
3.30274	2.98826	2.3385
2.58477	3.40663	3.01136
2.4384	3.30086	2.86378
3.126	3.19935	2.99175
3.12759	2.98589	2.97498
2.58906	2.77984	2.29425
3.31653	2.85763	3.29682
2.26215	2.75569	2.74894
2.94016	2.97272	3.22657
3.26438	3.25617	2.80671
2.43366	3.45924	2.77826
2.25243	2.79764	2.2899
2.78451	3.1874	2.74272
2.86811	2.98806	3.20629
2.68632	3.36353	3.3392
2.4744	3.07678	2.62456
3.19491	2.96558	2.45409
2.82795	3.01002	3.78722
2.566	3.33951	2.5276
2.62397	3.03248	3.20712
2.6319	2.67237	3.07296
2.75799	3.0823	2.8756
2.71522	2.87207	1.68031
1.99709	3.21073	2.62486
2.56867	2.81177	2.47346
2.67097	2.79192	3.53369
2.97215	3.00968	2.42167
2.07759	2.73418	2.75422
2.38254	2.88864	3.13289
2.81536	3.00808	2.85479
2.54995	3.76859	2.93882
2.8738	3.18174	2.69569
2.97412	3.01929	2.7606
2.55773	3.01444	2.72457
2.35265	3.1129	2.64435
2.95837	3.12443	3.53863
2.06031	2.87034	2.64453
1.97064	2.91763	2.30196
2.59447	3.13698	2.30533
2.85251	2.64594	3.48512
2.36772	2.93922	2.70612
2.81068	3.00073	3.53159
2.89223	3.17817	2.40999
2.15307	3.14461	2.6722
2.72381	2.98309	3.00874
2.33134	3.04341	2.50694
2.31316	3.11269	2.6435
2.95125	2.9143	3.09169
2.65836	2.86805	3.19195
2.42371	2.62585	2.76916
2.92402	2.95863	2.75697
2.73089	2.74119	3.10804
2.67093	2.98114	2.53255
2.79719	3.13335	3.08046
2.857	3.8702	3.27724
2.95891	3.112	2.52886
2.58635	2.83482	2.65105
2.86852	2.96612	2.58873
2.87964	2.96171	2.60301
2.41658	3.1693	2.63431
2.87646	2.78398	2.89579
2.36445	3.10021	3.1123
2.80657	2.64472	2.65248
3.37173	2.88853	2.70452
2.82385	2.99131	2.95156
2.9751	2.79517	3.12424
2.73663	2.92271	3.63741
2.53416	3.20898	2.97971
2.9931	2.73711	2.32808
2.31707	2.91576	3.52778
2.81631	2.9245	2.91851
2.3894	2.97108	3.77965
1.63226	2.80831	2.67503
2.99155	3.37868	2.68754
2.89421	3.14173
2.65307	3.03565
3.12196	3.21239
3.12385	3.38467
3.16811	3.02834
2.45204	2.8311
2.79206	3.15546
2.66785	2.99508
2.15833	2.61618
3.32938	2.97705
2.78026	3.10784
2.76821	2.88747
2.70828	3.42545
2.74637	2.99801
2.51844	3.12681
2.68416	2.97036
2.64645	2.61507
2.46275	2.83792
2.7144	3.07603
2.56514	3.27114
2.77076	2.75592
2.07629	2.80033
2.26022	2.90387
2.55386	3.12625
2.18282	3.07908
3.14318	3.02305
2.66483	2.77036
2.87432	2.81837
2.81592	3.02294
2.86219	3.10443
2.75562	3.07226
2.31189	2.99439
2.89344	3.37116
2.21331	3.10448
2.5918	3.50323
2.39641	2.97905
2.34534	3.39001
2.89132	3.3679
2.68144	3.14948
3.26673	3.05646
2.25513	2.82052
2.83984	2.65426
2.63398	2.69725
2.67934	3.27711
2.7716	3.24919
2.57151	2.51979
2.9697	2.63238
2.7769	2.74393
1.42519	2.7842
2.53093	3.04041
2.42888	2.82449
2.42468	3.23721
2.51514	2.95533
2.64345	2.9887
2.55386	2.65727
2.43879	3.10786
3.10874	2.75161
2.92053	2.80948
2.3404	3.15299
2.32136	3.08728
2.7353	3.28454
2.11989	3.23508
2.90694	2.82094
2.60993	2.5276
2.80721	3.22262
2.73299	2.63311
2.93966	2.74405
2.87503	2.97096
2.16881	2.75847
2.70124	3.03264
2.55368	3.11654
2.36096	2.9322
2.89862	2.75403
2.4343	2.95858
2.7809	3.28577
2.47996	2.98669
2.8233	2.66487
2.92817	2.93986
2.2237	2.71717
2.44555	2.9923
2.7741	3.3143
2.79702	2.70784
2.95335	2.76927
2.01038	3.06953
2.62174	2.81256
2.97845	2.90189
2.69383	3.13863
2.59266	3.03712
3.19664	2.66425
2.5434	3.16491
2.88373	3.24759
2.47712	2.64373
2.72735	2.58082
2.8953	2.99009
2.42411	2.92233
2.82954	2.98702
2.7578	3.13721
2.43493	3.19413
2.75611	2.97373
2.69795	2.96896
2.69445	3.1855
2.68067	3.30625
2.0132	2.80795
3.14901	3.37635
2.54726	2.71822
2.338	3.26549
2.7052	3.16402
2.77536	2.91854
2.94082	2.73444
2.54292	2.88235
2.54534	2.94057
2.68446	2.88317
2.76049	2.95538
2.46134	3.19626
2.65745	2.89713
2.1526	2.83542
2.79992	3.29243
2.60055	2.80402
2.80152	2.88761
2.38011	3.23469
3.08818	2.98855
3.113	2.69618
2.57677	3.13487
2.57049	3.08864
2.82776	2.9338
2.69072	3.15112
2.68229	2.77926
2.57694	3.52794
2.88527	2.64392
2.86924	2.67646
2.43056	3.11038
2.64952	2.74671
2.41475	2.60055
2.52343	3.09231
2.98052	3.06087
2.75145	2.98587
2.28345	2.96776
3.2327	3.07913
2.36267	3.12178
2.55539	3.57775
2.58076	3.13113
2.9024	2.89889
2.91495	2.93303
2.96178	3.29125
2.38335	3.16832
2.51481	3.1701
2.47296	2.93702
2.30663	2.75821
3.25566	2.83526
2.83969	2.63238
2.59638	2.72346
2.26669	2.53223
3.1728	2.79541
2.64664	3.44921
2.52463	3.13404
2.59463	3.20448
2.70736	3.20735
2.7046	2.92961
2.82683	3.25342
2.54097	2.76331
2.5685	3.31979
2.78638	2.83268
2.37088	3.07583
3.61191	3.01849
2.71741	3.17134
2.31591	3.01858
2.74917	2.9714
3.25603	3.05678
2.36002	2.67892
2.95973	3.0346
2.41575	3.10471
2.18542	2.98338
2.74444	3.00585
2.94498	2.56047
2.61598	2.79154
2.99315	2.87995
2.43152	2.80193
2.68741	2.75081
2.42411	3.04524
1.98337	3.01017
2.63848	2.75149
2.95254	3.34631
2.43918	2.99197
2.8782	3.34712
1.9313	2.81197
2.69524	3.05976
2.84226	3.1611
2.39857	3.12657
2.61955	2.7248
3.74291	2.74254
2.76777	2.78851
2.9544	2.76527
2.49992	3.05781
2.59718	2.88616
3.0968	2.84318
2.67663	2.80047
2.34818	3.48205
2.32798	3.14653
2.55925	2.91464
2.46	3.11374
2.52113	3.47692
2.58916	2.87472
2.60916	3.1573
3.1744	3.13335
2.90113	2.5958
2.829	3.03116
2.92084	2.44137
2.57088	3.02626
2.71857	3.37214
2.35802	2.69585
2.51011	2.82549
2.82398	3.3983
2.59319	2.95896
2.79689	2.75952
2.74035	3.50872
2.91854	3.25835
2.78641	3.29389
2.72522	2.3024
2.94357	3.00996
2.55785	3.08535
2.52508	3.20603
2.55521	3.05674
2.64213	3.22169
3.01602	3.35608
2.59781	2.94978
2.30706	2.96365
2.8686	2.60962
2.48067	3.25966
2.39771	3.10893
2.27317	3.30386
2.72973	2.87495
2.32561	2.58356
2.97284	2.71678
2.67745	2.93912
2.30229	3.17977
2.8298	3.09596
2.93398	2.76313
2.28855	3.41351
3.31965	2.56174
2.94518	2.93637
2.73715	3.39391
2.91846	2.98843
2.56139	2.83205
2.68412	3.03955
2.71401	2.65123
2.86039	3.12482
2.76135	3.13349
2.6603	3.02739
3.43427	2.78458
2.21128	2.86607
2.5685	3.16258
2.74126	2.83103
2.89314	2.63796
2.96908	2.98038
2.83623	3.1808
2.50147	2.7183
2.93165	2.63229
3.09358	2.87472
2.89886	2.86107
3.26456	2.51116
2.15026	2.7195
2.36257	2.57733
2.78261	2.95947
3.18543	2.80111
1.93703	3.01521
2.69676	2.89429
2.59089	2.56422
2.48475	2.88468
2.51286	3.26264
2.62348	2.82735
2.63359	3.05429
2.24198	2.81789
2.69449	2.77131
2.65777	3.16285
2.69176	3.42798
2.90229	2.71097
2.89851	2.62756
2.80748	2.97941
3.31362	2.75877
2.84444	3.0466
2.37392	3.25169
3.03026	3.19127
2.66116	2.78872
3.25671	3.1298
3.13823	3.00494
2.589	2.62065
2.96665	2.83635
2.53651	3.12097
2.44508	3.01105
2.18556	2.91391
2.42061	3.01023
2.65972	2.72943
2.70181	3.05791
2.63624	3.06595
2.76564	3.00293
2.98993	2.70047
3.09665	2.84136
2.12905	2.75039
2.39771	3.003
2.74079	3.1687
3.30773	2.83015
2.35745	2.60332
2.39641	2.71409
2.61024	3.10199
2.68859	3.03698
2.17683	3.3308
2.46075	3.23182
3.01585	2.61744
2.86222	2.66851
3.0692	2.90755
3.30752	3.06508
2.65559	3.21297
2.65063	2.88451
2.31886	2.96358
2.79582	2.96653
2.35323	2.78172
2.78115	2.88038
3.06609	3.38051
2.44377	3.07657
2.34416	2.70708
3.28502	3.15811
2.52088	2.90173
2.52886	2.87225
1.82852	2.29901
2.6186	2.63088
2.18858	2.98894
2.71518	3.10406
2.70616	3.30443
2.48059	3.11088
2.95493	3.22037
2.6516	2.87956
2.68863	2.91349
2.77076	3.05697
3.11618	2.7298
2.82536	2.71892
2.59913	3.42627
2.73374	3.36224
2.55942	2.60612
2.82042	3.15573
2.67559	2.78641
2.72297	3.02717
2.96028	2.96958
2.42363	3.20509
2.98696	2.98896
2.39143	3.07473
2.83123	2.38993
2.39081	3.13399
2.70911	2.85236
2.67663	3.28267
2.74064	3.46563
3.01025	2.89645
2.4358	3.30537
2.52247	2.8997
2.80611	3.05928
2.81157	2.66134
2.56919	3.13743
2.28651	2.99236
2.6192	3.06306
2.47454	3.18827
2.92824	2.77697
2.8127	2.6478
2.4373	3.1261
2.22672	2.76161
2.85287	3.10124
2.45559	2.9955
2.52861	2.72833
2.43572	2.91903
2.4789	3.28282
2.68323	2.54726
2.37611	3.07906
1.19423	2.77091
3.0201	3.01765
2.93607	2.55119
2.66255	3.36716
2.72594	3.13873
2.63059	2.75456
2.94615	2.90596
3.32663	3.17349
2.56828	3.04562
2.92532	3.14991
2.73939	2.82897
2.87569	3.12914
2.27759	2.83732
2.8413	2.8547
2.77243	3.01645
2.65823	2.64547
2.38701	2.66443
2.94339	3.07491
2.73228	3.23299
2.40287	3.19939
2.58624	2.44027
2.4603	3.53123
2.4874	3.01084
3.01901	2.93258
2.73722	2.78631
2.6457	3.14423
2.60669	2.92915
2.92266	3.01388
2.46149	2.94256
3.16522	2.86537
2.52514	2.75844
2.47576	3.19435
2.75742	2.93766
2.90814	2.99153
2.81769	2.86645
2.4892	3.0161
2.61669	2.71799
2.57088	3.28643
2.03639	2.98762
2.28276	2.61386
2.88286	2.89008
2.61152	3.00417
2.72905	2.93423
2.7054	3.14714
2.59415	2.83262
2.63263	2.76146
2.67211	3.40615
2.77406	2.96591
3.08981	3.02361
2.67904	3.12503
2.72181	3.06683
2.93734	2.88322
2.6205	2.83513
3.00648	3.14044
2.89892	3.08642
2.75123	3.23464
2.89615	3.00041
2.66665	2.38424
2.76542	2.92637
2.61396	2.58038
2.14869	3.0616
2.71931	2.83679
2.67433	2.85275
2.54947	2.91218
2.69631	3.15706
3.17904	2.6718
2.50541	2.99846
2.7248	2.99173
3.13371	2.89713
2.86119	2.78764
2.84022	3.14025
2.73493	2.55691
2.34886	2.90816
3.04527	2.88908
2.7489	2.78048
2.9063	2.87331
2.80033	3.19839
2.50879	2.92282
3.10112	3.20719
2.85078	2.82805
2.41367	2.72897
2.97716	2.88758
2.8746	2.68059
2.55042	2.7612
3.01779	2.95405
2.49572	2.5858
2.83469	3.5215
2.66389	3.07637
2.41434	2.69499
2.88625	3.11661
2.46606	2.8938
2.69491	2.64317
2.67049	2.84028
2.63253	3.07486
3.11793	2.55084
2.64715	3.44391
2.84321	2.96437
2.46289	2.7922
2.73733	3.26432
2.63556	2.45295
2.7046	3.22309
2.89253	3.15946
2.80294	3.26829
2.89008	3.1585
2.76762	3.12225
2.96908	3.01742
2.46679	2.61865
2.72818	2.94052
2.66683	2.89916
2.72995	3.24077
2.85254	3.14091
2.37575	2.93572
2.70768	3.03284
2.64355	2.74629
2.5607	2.98249
2.74075	3.07881
2.32613	3.02565
2.58981	2.83957
2.3223	2.72239
2.4292	2.81546
2.55866	3.40985
2.58131	3.11465
2.80698	2.92351
3.08727	2.78161
2.77348	2.73183
2.64514	3.12157
2.58219	3.06143
2.78722	3.11503
2.73741	2.72803
2.98769	2.92371
2.98649	3.6692
2.80624	3.11234
3.0263	2.50248
3.04045	2.89173
2.65206	3.09788
2.46985	2.70983
3.14809	3.1874
2.85793	2.93493
3.06208	2.78589
2.91683	2.66102
2.69454	3.12951
2.59421	2.62159
2.61254	2.74328
3.54499	3.33072
2.4681	3.00745
3.04436	2.85903
2.87888	2.94537
2.9174	3.34577
2.34671	2.57432
2.45052	3.02842
2.4853	3.0959
2.571	3.10986
2.73493	2.89658
2.72518	2.79192
2.6107	2.68938
2.52811	2.67163
2.52463	3.0947
2.62466	2.69807
2.02621	2.78282
2.43223	2.6867
2.40712	2.87817
3.08595	2.85476
3.16145	3.0053
2.51618	2.81464
2.65918	2.65886
2.71208	3.35344
2.2129	2.9322
2.55279	3.09673
3.00387	2.89617
2.74217	3.06613
2.85995	3.2365
2.6565	2.9996
2.44004	3.36599
2.35022	2.93475
2.45911	2.7413
2.84753	2.92705
2.84921	2.90949
2.57443	3.35691
2.65445	2.96342
2.72882	3.18237
2.66864	3.30883
2.89038	3.24889
2.63595	3.23941
3.05589	3.15578
3.09101	2.59824
2.50833	3.12084
2.72999	3.39369
3.21515	2.65339
2.75915	3.03078
2.25902	2.56052
2.95419	3.00304
2.88348	2.95127
2.76769	2.97759
2.62481	2.6187
1.98685	3.11149
2.77525	2.82993
2.6528	3.18344
2.82003	3.24711
2.76309	3.49844
2.92751	3.0289
3.1156	2.84824
2.63369	3.07748
2.75832	2.7593
2.5484	3.37295
2.66983	2.77113
2.89234	3.16911
2.57966	3.13585
3.15866	3.17527
2.59319	2.8004
2.23448	2.88966
3.16455	2.9629
2.49918	3.25491
2.58949	3.24736
2.77243	2.68195
2.2741	3.32311
3.17423	3.06716
2.41542	2.98616
2.51129	3.16114
2.42281	3.34409
3.08158	2.73556
3.45689	2.98835
2.25464	2.97261
2.48038	2.98702
3.13053	3.12038
2.83151	2.85127
3.5397	2.72316
2.19792	2.97641
3.01948	3.27974
2.7334	2.76868
3.3634	3.03367
3.1454	2.72327
2.70971	3.07444
2.79603	2.95328
3.0027	2.61849
2.27047	2.65431
2.87308	2.95683
2.49742	2.63996
2.69026	2.72358
2.74013	3.20134
2.9093	3.00095
2.5765	2.96764
2.17328	2.9905
2.67009	3.09007
2.63383	2.66215
2.2755	3.0269
2.72689	2.99727
2.27023	2.7052
2.54407	2.84478
2.6975	2.97655
2.41946	2.8614
0.916356	2.70887
2.71452	2.71141
2.61228	2.85133
2.78977	2.86671
2.86184	2.93072
2.68746	3.05419
2.75799	3.15868
2.09079	2.86449
3.34899	3.31789
2.44447	3.16572
2.60783	2.64678
2.52899	3.21839
2.6626	3.43428
2.79839	3.12802
2.28855	2.7292
2.75164	2.9417
2.63005	3.12082
2.5611	2.56359
2.88491	2.98132
3.22331	2.92966
2.76985	3.06436
2.43303	2.7987
2.36115	3.14543
2.6258	3.11551
2.81837	3.35746
2.62244	2.84349
2.71589	2.90146
3.07935	2.87703
2.59554	3.07545
2.40746	2.53317
3.12181	2.83894
3.12777	2.78928
2.25169	3.01484
2.77482	2.91727
2.9322	2.84585
2.03557	3.22424
2.89625	2.94542
2.14995	3.00026
2.77901	2.45582
2.60269	2.65709
2.46015	3.30208
3.22062	3.02992
2.37272	2.1975
2.22971	3.07743
2.40381	2.88443
2.29147	2.99085
2.88334	2.94158
2.96388	3.16052
2.3388	2.69205
2.46082	3.0847
3.12646	2.82597
3.09423	3.34921
2.98013	3.03074
2.92923	3.01151
2.66111	3.07551
2.59013	2.94777
2.99626	3.39566
2.27874	2.8213
2.90729	2.82227
2.81723	3.01839
2.75911	3.08279
3.11434	2.59218
2.29592	3.23775
2.57866	3.04828
2.94457	3.2048
2.67433	2.77651
2.68084	3.05178
2.90718	3.24932
2.33114	2.97325
2.58406	3.08526
2.48088	3.17903
3.16508	2.90556
1.69246	2.64369
2.86892	2.75844
2.01816	3.02519
2.76413	3.2386
1.94803	2.95244
2.46898	2.6908
2.48656	2.64383
2.62908	3.29698
2.61538	2.77787
2.46319	2.81213
3.0293	2.86496
2.61804	2.87452
2.46912	3.00712
2.42654	2.91267
2.41938	2.86375
2.8454	2.59357
2.18224	3.02434
2.53914	2.83817
2.66219	3.02387
2.92079	2.93039
2.67642	2.78183
2.9329	2.8224
2.28572	3.11298
2.73921	3.14927
2.65458	2.7505
2.04832	3.35074
2.6189	3.15897
3.11059	3.29592
2.85368	3.51235
2.20237	2.62204
2.99389	2.83419
2.44508	2.83966
2.78345	2.95469
2.93119	3.18312
2.69255	2.55685
3.01182	3.19767
2.55018	2.96321
2.79317	3.00326
2.13543	3.09165
2.73559	3.18424
2.93694	2.98693
2.6105	2.91815
2.62884	3.64461
2.24337	2.69901
2.07084	3.23265
2.8587	2.89723
2.32324	2.88633
3.0694	2.96257
2.88605	2.70246
2.64242	2.93505
2.76916	2.86817
2.96843	3.10264
3.15403	3.14106
2.8479	2.8553
3.19938	2.89783
2.92814	3.20085
2.33489	2.53951
2.25329	3.37842
2.9842	3.45475
2.63127	2.76799
2.85691	2.91068
2.97858	2.7479
2.28184	2.84127
2.66183	3.46233
3.20728	2.92652
2.974	2.54213
2.61905	2.66891
2.54965	2.89171
2.99956	2.942
3.46954	2.63301
2.76497	3.26464
2.93964	2.93946
3.13781	2.95314
2.0857	3.12959
2.74625	2.86202
2.74482	3.08314
2.8128	2.72189
2.64481	2.98354
2.49099	2.69921
3.10258	3.02608
2.77575	2.74924
2.96831	3.37769
2.39257	3.47045
2.58933	2.98043
2.95593	2.75802
2.89986	2.923
2.3399	3.02793
2.24173	3.26546
[truncated: 4,498 more rows]

## Sheet: Fig.1i
Fig. 1i. APC_BCL-2 expression (log10) in the co-cultured cells
U937 MF	THC	22Rv1
2.82716	3.3116	3.16054
3.07871	3.14047	3.07955
3.30011	3.42298	2.99961
2.82312	3.14832	2.57661
3.06382	3.09039	2.77784
2.63397	3.38859	3.3077
2.79772	3.33764	3.72467
2.80468	3.19062	2.61285
2.43191	3.08907	3.08128
2.16962	2.88734	3.92799
2.81891	3.26102	3.94528
2.43373	3.25062	2.65035
2.6016	2.90983	2.95178
2.90433	3.1009	4.26493
3.01816	3.29032	3.27463
2.40735	3.23742	3.38155
2.53702	3.18008	2.90415
2.58881	3.34756	3.19636
3.14744	2.87782	2.89394
2.76984	3.2268	3.44797
2.58889	3.6538	3.21669
2.67998	4.02453	3.32856
2.92989	3.23139	2.93759
3.26964	3.10163	3.21118
2.95409	3.39576	3.08343
2.8902	3.28864	3.67645
3.06414	3.43642	2.99508
2.79713	3.26793	3.53169
2.56859	3.53735	3.15818
2.67211	3.3973	3.63328
2.25905	3.38814	1.79319
2.46162	3.21523	3.11023
2.45584	3.36881	3.52423
3.09563	3.01897	2.48237
2.74848	3.35169	3.11758
2.45188	3.17994	3.62365
2.71769	3.09592	3.29736
2.77342	3.32208	3.0271
2.54195	3.18512	2.08919
2.50564	3.42938	3.48888
2.73873	3.34179	3.02267
2.64048	3.17521	2.89587
3.11326	3.65374	2.97082
2.60543	3.16786	4.09167
2.88503	3.2395	3.14102
2.68807	3.54315	3.47983
2.43721	3.222	3.08755
2.80987	3.25982	2.19983
2.53567	3.18295	3.06693
3.03668	3.00045	3.22378
2.57446	3.52405	2.84072
3.64093	3.31155	3.17018
2.75455	3.72992	3.21182
3.31094	3.40506	3.13388
2.69819	3.58443	3.11225
2.7061	3.33895	3.01824
2.51416	3.46439	2.70484
3.01188	3.30333	3.09379
2.68293	3.49526	3.21055
3.00816	3.41649	3.85595
2.53482	3.15933	2.47065
2.94941	3.36409	3.61689
2.77246	3.40715	2.87911
2.23471	3.16041	2.92525
2.65299	3.40881	3.83158
2.50843	3.43824	2.38394
2.86914	3.64031	2.89671
3.48108	3.5584	2.76504
2.71224	3.24796	2.46641
2.84435	3.54437	3.02402
2.83568	3.67346	3.29697
2.58698	3.20579	2.7812
2.84708	3.39072	2.7914
3.09083	3.18892	3.41998
2.98446	3.34004	3.18552
2.5212	3.382	2.20079
2.38439	3.04892	3.21994
2.44837	2.89957	3.59343
2.75261	3.48946	2.85783
2.91905	3.10733	2.91746
2.76699	3.222	2.81806
2.7837	3.19248	3.30985
2.89801	3.06318	3.58118
2.69615	2.94555	3.45641
2.75538	3.45756	3.17313
2.9607	3.35143	2.94105
3.24307	3.43997	3.0602
2.50917	2.89081	4.03263
2.58728	2.72242	3.19036
2.96664	3.72946	2.40039
2.78966	3.16406	3.08651
3.07168	3.19484	2.78676
2.99481	3.62011	2.80388
2.56823	3.24289	3.72323
3.06145	3.33044	3.21463
2.9344	3.27748	3.27199
2.42407	3.33282	3.07956
2.97699	3.20051	3.12682
2.7382	3.23274	3.65799
3.26531	3.32712	3.74864
2.72799	3.01885	3.27813
2.7287	3.14194	2.53248
2.77739	3.27058	2.83762
2.62381	2.95155	3.52311
2.69818	3.1227	3.90772
2.55488	3.11181	3.0856
2.65862	3.22477	3.28542
2.76862	3.38816	3.86269
3.05226	2.99217	2.70731
2.60455	3.44742	3.20888
2.86379	3.26102	2.84649
3.18502	3.37097	2.79745
2.86678	2.89421	3.79273
2.83724	3.20855	3.20876
2.71358	3.67654	2.34913
2.5471	3.42157	3.25626
2.90735	2.81243	3.42348
2.89743	3.15293	3.41591
2.76775	3.41134	3.19164
3.02619	4.08306	3.71366
2.42298	3.37602	3.32702
2.37191	3.16651	2.16531
2.69251	3.29964	3.46708
2.25918	3.55925	2.99178
2.41208	3.05055	4.00777
2.56776	3.23456	2.79152
2.71971	3.19398	2.56532
2.79223	3.36342	3.55199
3.02865	3.33946	2.11533
2.87647	3.54526	2.623
3.27518	3.26442	3.06983
2.52888	3.28173	2.98056
2.88681	3.45902	2.44337
2.61621	3.88396	3.14669
2.76946	2.88386	2.9267
2.52599	3.49005	2.19882
2.41438	3.33173	3.10723
3.09669	3.81851	2.452
3.21009	3.39937	2.66528
3.12242	3.23197	3.40984
2.4424	3.25515	2.7448
3.0174	3.64222	2.63394
2.42566	3.46269	3.25394
2.7367	3.49868	3.35289
2.76152	3.27082	3.93267
2.45331	3.97136	2.94723
2.98892	3.29397	3.27953
2.7901	3.20659	3.41729
2.68445	2.73341	3.57711
2.91331	3.4601	2.76506
2.71007	3.06918	2.45593
2.68275	3.28872	3.00219
3.17785	3.44376	2.47966
2.6408	3.25799	3.34264
2.60806	3.54234	2.4431
2.83579	2.95027	3.45684
2.53042	3.34396	2.253
3.05537	3.18034	4.01727
2.79388	3.52435	2.61683
2.90858	3.15354	3.92059
3.16281	2.8784	2.59264
2.67132	3.23554	2.75748
2.38441	3.59547	2.63023
2.84125	2.98426	2.6094
2.65225	2.96608	3.02769
2.67539	3.36117	3.39624
2.37328	3.34902	3.49461
2.4286	3.19214	3.07639
2.94391	3.21739	3.16428
2.76116	3.20144	2.67285
2.9468	3.63442	3.18027
2.7103	2.71768	3.22551
2.64441	3.33822	2.79004
3.10404	3.39505	3.27286
3.41206	3.32898	3.40648
3.4691	3.39854	3.65077
2.54802	3.62099	3.78942
2.37582	3.19951	3.38503
2.95845	3.13274	2.78103
2.77736	2.92052	3.36883
2.88958	2.86314	3.31113
3.08002	3.6978	3.00241
2.80799	3.0905	3.67218
3.05026	3.03006	3.51513
2.64567	3.2408	3.10757
2.64962	3.56631	2.99065
2.64125	3.4587	3.5972
2.63225	3.47141	3.98029
2.80465	3.17045	2.76355
2.7985	3.19245	2.84585
2.63325	3.58841	2.63404
2.78824	3.20942	3.1463
2.69996	3.1438	3.36955
3.21689	3.28093	3.3992
2.89357	3.00758	3.23996
2.26138	3.25264	3.46769
3.49382	3.15715	2.59255
2.96903	3.05774	2.5598
2.79964	3.33656	2.79377
2.68859	3.76889	3.25874
2.67586	2.75855	2.63677
2.57743	3.71672	3.59204
2.53141	3.29248	3.71669
2.72006	3.31389	3.04006
2.79672	3.29194	3.96841
2.64794	3.28383	3.91253
2.58203	3.28438	3.15923
2.79289	3.33603	3.4794
2.79169	3.17759	2.19038
2.74861	3.46587	3.34467
3.01372	3.34791	3.50572
2.4321	3.16351	2.94968
3.04494	3.20268	3.34691
2.67431	3.37985	2.97928
2.72786	3.18778	2.97563
3.06896	3.07675	3.18561
3.17723	3.13156	3.06373
2.91806	3.2294	3.31196
2.56608	3.27017	2.91004
3.02897	3.61755	3.07193
2.76788	3.11828	2.9798
2.70264	3.29335	2.99799
2.72762	3.15238	3.84378
3.10542	3.20856	3.43854
2.84514	3.33442	3.95234
2.10189	3.66197	3.37865
2.54515	3.22888	3.98422
3.21802	3.22241	2.89878
2.93429	3.34761	3.33429
2.59641	3.55105	3.61004
3.15452	3.31335	3.45331
2.66201	3.29459	3.14727
2.88274	3.63779	4.09174
2.81723	3.30286	2.74793
2.61412	3.0006	3.1405
2.81613	3.31472	3.66
2.71829	3.49839	3.47068
2.75414	3.18173	3.34852
3.30915	3.38428	3.83113
2.24022	3.15297	3.70307
2.58931	3.21795	3.12059
2.48689	3.02909	2.99633
2.73221	3.33851	2.68756
2.72256	3.13675	3.03013
2.40483	3.19623	3.44744
2.96389	3.29676	3.03831
2.73855	3.2496	3.62591
2.86109	3.17913	2.82765
2.9278	3.49754	2.62532
2.86535	3.32605	3.97167
2.79405	3.24735	3.44818
2.29689	3.34328	3.32545
2.65735	3.22715	3.78792
2.95395	3.10669	2.72429
2.65356	3.46615	3.20221
2.49399	3.23739	3.17529
2.99794	3.07993	2.92412
2.78829	3.24772	2.14193
2.81603	3.69269	2.03935
2.58369	3.04173	2.98992
2.71647	3.46361	3.4072
2.615	3.76216	3.19728
2.57905	3.01777	2.7056
2.51712	3.41009	3.60341
3.12606	3.23386	2.85021
2.72703	2.8995	2.89827
2.94114	3.0497	2.95088
2.54468	3.52331	2.81592
3.28939	3.27948	3.46536
3.07628	3.26483	2.25011
3.45347	3.12366	3.70145
3.08037	2.98806	2.6077
2.44512	3.51249	3.43877
2.86236	3.19934	2.66335
2.56196	3.24211	2.14394
2.68237	3.06044	3.21594
2.64322	3.7182	3.2448
2.78125	3.38274	3.64482
2.96632	3.11128	3.45839
2.48977	3.13931	3.32382
3.3694	3.33999	2.48858
2.24938	3.39582	2.13989
3.17331	3.13221	2.86717
3.0257	3.45873	3.55363
2.98904	3.60943	3.96601
2.89022	3.41892	3.28755
2.79425	3.16176	2.6756
2.77078	3.35106	2.9771
2.83726	3.35038	3.49253
2.82306	3.18784	3.39649
2.66762	3.47814	3.56239
3.04651	3.37036	2.64653
3.07607	3.76576	3.88222
2.88996	3.32253	2.88206
2.50267	3.73617	3.90987
2.25724	3.21402	3.27586
3.14469	3.71319	2.81144
2.94335	3.40328	3.22854
2.61957	2.99772	2.03601
3.00413	3.22939	2.64926
2.58059	4.00874	2.01574
3.32566	3.59724	2.08307
2.86568	3.17163	3.26514
3.06919	3.20857	2.55989
3.85366	3.18313	2.81864
3.04866	3.45751	2.83072
2.42839	3.42261	3.24807
2.70344	3.36452	2.53165
2.69429	3.43243	3.27849
2.08443	2.99037	2.8534
2.8994	3.94969	2.69936
2.99457	3.1737	3.20558
2.78681	3.53607	4.04782
2.81551	3.2561	3.31229
2.81379	3.0629	2.37654
2.69886	3.3001	4.40009
2.58849	3.12332	2.60519
2.78185	3.08493	3.26934
2.9491	3.00886	3.84527
2.80718	3.58429	3.43827
2.974	2.99989	3.47895
2.97363	3.1072	3.44755
3.08436	3.21751	2.60777
2.38203	3.27173	3.26487
2.52559	3.5497	2.75906
2.68919	3.30098	2.6424
2.3853	3.45111	3.53976
2.58702	3.41715	2.34755
2.68293	3.67085	3.71288
2.76837	3.27142	3.10978
2.44727	3.42781	2.64976
3.05149	3.63066	3.45841
3.25054	3.42679	2.65691
2.74333	3.34725	3.72761
2.90393	3.16471	3.09052
2.77318	3.47911	3.08457
2.60531	3.32477	3.87712
2.98745	3.18746	3.2086
2.52167	3.06177	3.06474
2.85197	3.271	2.42062
2.61452	3.28856	3.50807
2.92975	2.94651	3.12269
2.73924	3.47447	2.98489
2.54433	3.49368	4.00428
2.18455	3.19203	3.3206
2.31065	2.91484	2.89541
3.08932	3.22718	3.71081
2.8543	3.63399	3.64378
2.81239	3.50789	2.8116
2.93287	2.87938	3.25167
3.0637	3.332	2.57976
2.62938	3.37799	3.51332
2.58958	3.35343	3.24059
2.79091	3.36725	2.73297
2.35939	3.52995	3.09396
2.84493	3.60972	3.78644
3.12429	3.18847	2.60322
2.75459	3.48359	3.24294
2.99463	3.26371	3.44534
3.08296	3.33271	3.77406
2.33188	3.41378	2.69599
2.69969	3.35992	3.33041
2.60502	3.27598	2.96856
2.83307	3.37758	3.21721
2.74334	3.41802	3.6135
2.89671	3.46043	3.11133
2.89548	3.2495	2.95534
2.80085	3.40631	3.09401
2.89276	3.33491	3.66024
2.67727	2.91857	2.91839
2.72391	3.27258	3.12808
3.16802	3.31046	3.00709
2.57523	3.34247	0.368984
3.22456	2.9085	2.15729
2.27196	3.35479	2.64437
3.00516	2.95698	3.69195
2.89126	3.25211	2.87912
2.97587	3.37703	3.27402
2.92207	3.20667	3.5842
2.87746	3.13926	2.46778
2.84362	2.92226	4.08718
2.79401	3.0942	2.91442
2.08783	3.1102	3.87134
2.57652	3.27436	2.90037
3.00036	3.52143	2.41063
2.57904	3.47019	2.90555
2.73285	3.59694	2.3825
3.04431	2.97355	3.78749
2.87278	3.40711	3.61933
3.13796	3.16687	3.53525
2.93756	3.09443	2.67556
2.72835	2.98375	3.38545
2.68129	3.34167	2.6845
2.72245	3.09052	3.50456
2.68388	3.37864	2.43647
2.46933	3.15342	3.56989
3.04766	3.31619	3.40518
2.50807	3.17923	3.76327
2.63668	3.24561	3.23824
2.51194	3.52338	1.825
2.44716	3.19326	3.39198
2.52633	3.21698	3.72344
2.26885	3.40772	2.69449
2.94169	3.46826	3.17752
2.84555	3.35627	2.90367
2.87912	3.73044	2.45864
2.65082	2.84782	3.02371
2.28425	3.09398	2.94203
2.63335	3.1964	3.17878
2.59911	3.0292	3.91471
2.8358	3.43027	3.33296
2.59018	3.49003	3.34337
3.13148	3.19812	2.79849
3.00828	3.43443	3.31709
3.01608	3.38343	3.20641
2.56269	3.21454	3.15081
2.98467	3.48327	2.39646
2.76367	3.08115	3.50475
2.66128	3.32708	2.67531
2.37893	3.52666	2.03282
2.68454	3.18422	3.43718
2.96678	3.3893	3.04621
2.88773	3.4454	3.06412
2.67448	3.13893	3.6377
2.63596	3.43149	4.02637
3.14839	3.21938	3.63899
2.51231	3.7776	3.36569
2.51214	3.19455	2.25418
2.53656	3.26481	3.28524
2.68374	3.08302	2.49362
2.74197	3.31365	3.07404
2.69184	3.28075	2.79043
2.65524	3.50753	2.90954
2.75212	3.22305	3.95395
2.70281	3.31097	3.0435
2.58432	3.23885	3.82408
2.54647	2.8274	2.91069
2.6209	3.307	3.1972
2.72062	3.04833	3.41155
2.65476	3.27571	2.72718
2.45071	3.28697	3.01
2.70024	3.23474	2.79747
2.94669	3.33012	3.1159
2.87232	3.56904	3.00019
2.68014	3.35438	3.39768
2.6491	3.53616	2.40586
2.8691	3.42069	3.61626
3.33497	3.3039	3.75349
2.82849	3.15467	2.67913
2.78689	3.8917	2.69194
2.91279	3.28296	3.374
2.80466	3.92574	1.75607
2.44854	3.39907	3.47386
2.54298	3.36101	3.34117
2.88356	3.17224	2.78096
2.74092	3.55682	2.95262
3.19777	3.17838	3.0606
3.07848	3.3838	3.21613
3.0051	3.57677	3.43634
2.4841	3.40213	3.62457
3.09129	3.12241	3.65077
2.85972	2.93234	3.3531
2.79343	3.01288	3.06784
3.07428	3.70032	2.88552
2.96299	3.3712	4.16637
2.72751	3.01235	3.18761
2.89335	3.17889	2.72385
2.48434	3.7163	3.42971
2.80927	3.41719	2.94902
2.87556	3.1232	3.32045
2.88754	2.90542	2.41053
2.75272	2.98474	3.50495
2.72812	3.10491	3.59472
2.79805	3.28473	3.87126
2.74245	3.19207	3.49662
3.08485	3.05289	3.41809
2.60435	3.3345	3.24642
2.70264	2.88215	3.45486
2.93252	3.28363	3.27137
2.86314	3.40217	2.6537
2.73604	2.93321	3.16653
2.76528	3.27136	2.92489
3.18128	3.28358	3.10502
2.84444	3.42602	3.43093
2.98315	3.43968	3.57643
2.20947	3.24115	3.14864
2.6868	3.46645	2.91503
2.44352	3.14116	3.36371
2.61015	3.34558	3.45146
2.5234	2.98531	2.80786
3.12738	3.62017	3.24906
3.03511	3.30036	3.80042
2.47338	3.88729	2.67196
2.64157	3.40291	3.50287
2.715	3.05827	3.03585
3.02751	3.29577	3.95131
2.42976	3.39712	3.46086
2.93172	3.76021	1.92227
3.15051	3.00069	2.90099
2.49749	3.13418	2.63556
2.78198	3.37356	3.56979
2.44178	3.1496	2.46076
2.88918	3.20238	3.02145
2.34431	3.14882	3.64864
2.80133	3.11134	2.95979
2.69413	3.43093	2.02337
2.78505	3.54043	3.35143
2.85986	2.7864	2.39578
3.15382	3.83915	3.41175
2.78929	3.27776	3.69329
2.9528	3.53917	2.80744
2.97811	3.62618	2.26639
2.42781	3.51975	2.81774
2.62372	3.46452	2.51934
3.14167	3.21073	2.90233
2.6956	2.95064	3.30151
2.30638	3.11848	3.93285
2.86327	3.32595	2.63467
2.99124	2.98947	2.47801
3.1382	3.18832	3.11589
2.7012	3.70196	3.19174
2.80698	3.42719	3.21408
2.94601	3.55395	3.03496
2.55844	3.13021	2.94944
2.35337	3.50947	4.03645
2.57377	3.12035	3.42225
2.61524	3.11807	2.87778
2.87553	3.20271	3.03566
3.03331	3.00153	3.44548
2.66728	3.47673	3.56705
3.04731	3.05063	3.7941
3.15224	3.59226	2.00109
2.73211	3.11768	2.56088
2.8228	3.56789	2.89885
3.0023	3.37331	2.71565
2.73022	3.1184	2.7074
2.90511	3.10821	2.4051
3.04397	3.1946	2.86757
3.38683	3.15671	2.04666
3.01082	3.45458	2.31193
2.88327	3.38022	2.26548
2.54914	3.0955	3.24137
2.28156	3.09677	3.42529
3.1851	3.33639	3.52485
2.46059	3.19269	2.34435
2.85111	3.03897	3.26652
2.72602	3.16533	2.30219
2.88275	3.1581	3.69199
2.47206	3.28017	2.46506
2.70309	2.96329	2.59674
2.866	3.29543	3.29472
2.68852	3.19208	3.06611
3.16	3.52932	2.8107
2.36616	3.50034	2.61144
2.66813	3.40684	3.91525
2.55992	3.27676	3.83457
2.65658	3.54247	3.09577
2.58571	2.98405	3.41749
2.63936	2.99847	2.77682
2.86419	3.1178	2.95193
2.21907	2.95626	3.14071
3.31781	3.18411	2.83533
2.88379	3.11379	3.14488
2.90105	3.12383	2.72443
2.5642	3.33354	3.13858
2.92562	3.16984	3.7879
3.14977	3.37773	4.16938
2.87871	3.38118	2.04257
2.60382	3.20271	3.25872
3.08682	3.25532	2.77284
2.55807	3.2389	3.47742
3.14469	3.42219	3.40227
2.621	3.23999	2.25074
2.86078	2.82489	3.84328
2.4647	3.28557	3.47828
2.30765	3.57161	3.41618
2.51915	3.46679	2.68584
2.58939	3.25823	3.7732
2.76729	3.40536	2.67239
2.75358	3.28845	4.04361
2.74873	3.41765	3.00176
2.94693	3.40131	2.47727
1.68823	3.19198	2.8518
2.75502	3.5929	2.6273
2.93438	3.18851	2.97565
2.51229	3.21122	2.73912
3.31337	3.21305	3.52308
3.233	3.37193	2.30866
2.69147	3.22117	2.58181
3.50212	3.07958	3.74635
2.82656	3.21289	2.42171
3.10105	2.98817	3.26834
2.7271	3.75025	2.62329
2.66441	3.27029	2.75793
2.56977	3.29819	3.66843
2.77881	3.61436	3.90387
2.96754	3.26164	2.74236
2.93375	3.34392	3.5568
2.91168	2.8675	2.42445
2.4055	3.57614	3.31309
2.41627	3.34697	2.55199
2.47708	3.56472	2.66251
2.50221	3.23684	2.88075
2.57659	3.45386	2.07687
2.93625	3.35938	3.09292
2.71889	3.00308	3.09434
2.78541	3.46898	2.7732
2.35725	3.47092	2.22023
2.01383	3.20997	2.82483
2.69078	3.09372	2.66926
2.89804	3.35199	2.60145
2.94684	3.37952	2.84024
2.6046	3.16394	3.18146
2.77464	3.02684	2.98044
2.75001	3.42306	2.83883
3.12122	3.36093	3.019
2.49782	3.12944	2.6985
2.54724	3.20728	3.93459
2.64169	3.06148	2.46672
2.72769	3.27403	3.189
2.23331	3.30304	1.91501
3.06121	3.10066	3.07276
2.76142	3.39855	2.83303
2.50114	3.22653	3.77893
2.53357	2.94862	2.31237
2.92974	3.18058	3.26023
2.91723	3.35047	3.95153
2.81823	3.17005	3.46151
2.63942	3.35145	2.2104
2.47549	2.53114	2.55542
2.9819	3.28866	2.7065
2.73094	3.27747	3.33529
2.65654	3.55509	2.9081
3.00182	3.32888	2.5094
3.31161	3.46553	2.54505
2.52801	3.55953	2.66241
3.02774	3.23317	3.60234
2.4051	3.04594	3.14861
2.85065	3.23554	3.05281
2.57637	3.34215	3.06841
2.74311	3.02613	2.88382
2.99213	3.24933	3.45673
2.57901	3.4301	2.79012
2.66118	3.95639	2.10494
2.4753	3.44877	2.75126
2.3644	3.02003	2.78437
2.75497	3.05407	3.52431
3.01408	3.48313	3.60989
2.53679	3.45726	3.19644
2.47875	3.41424	2.63209
2.62113	3.47308	3.77422
3.0126	3.23055	4.13361
2.87539	3.11188	3.33184
3.05833	3.51365	2.92091
2.97377	2.83062	2.92683
2.81909	3.15988	3.60544
2.82162	3.19269	3.5399
3.12536	3.21496	2.84202
2.58299	3.07119	3.13743
2.70138	3.19176	2.36595
2.69052	3.16761	2.64665
2.52461	3.28991	2.97117
2.52548	3.19764	3.5726
2.64088	3.67494	2.60812
3.01052	3.13578	3.11861
3.01386	3.41236	4.04521
2.65803	3.34316	3.27291
2.68113	3.0952	3.73789
2.5519	3.39674	4.08282
2.67024	3.45318	3.39701
2.83582	3.20119	2.49058
2.7118	3.26763	2.60603
2.91638	3.12824	3.1768
2.49888	3.41382	4.06872
2.42507	3.39817	4.2024
2.9406	3.64923	2.77405
2.47444	3.22347	2.21587
3.07826	2.87505	3.6191
2.63288	3.12187	4.03499
2.64089	3.39818	4.4026
2.57835	3.59342	3.64083
2.95502	3.36211	2.97616
2.74117	3.06641	3.10659
2.9511	3.86887	3.13172
2.69449	3.27444	3.5137
2.91538	3.04229	3.23273
2.6922	3.89852	2.69496
2.59641	2.75745	3.21999
2.57894	3.027	1.82904
2.65531	3.41927	2.78744
2.7948	3.09352	2.71736
2.50233	3.01086	2.63579
2.64701	3.52961	2.74982
2.57931	2.92404	2.56277
3.10291	3.31254	4.06963
2.66231	3.16568	2.90279
2.96519	3.19916	3.45
2.72007	3.12982	3.26232
3.28508	3.58236	2.99108
3.09575	3.32397	3.62674
2.60054	3.15883	2.65722
2.52615	3.28627	2.77853
2.8588	2.84923	3.79325
2.68779	3.244	3.67557
3.00242	3.19518	2.65249
2.7945	3.76663	3.32191
2.60827	3.74207	2.82019
2.33537	3.21197	2.56261
3.1437	3.09275	3.7817
2.93255	3.07793	3.69859
2.90721	3.4218	3.90265
2.65265	3.55229	2.31422
3.22915	3.21498	2.80754
2.68147	3.04985	3.14931
2.36177	3.36608	2.9784
2.90213	3.35673	3.48749
2.74644	3.12142	3.5333
3.11959	3.26141	3.28723
2.61181	2.99398	2.79359
2.82359	3.35262	3.70698
2.85196	3.06674	2.71178
3.14628	3.32695	2.65601
2.48721	3.43252	2.21809
3.0213	3.28714	2.00562
2.90035	3.8149	3.44977
2.65317	3.17924	2.84567
2.95353	3.40871	3.40242
2.82961	3.00779	2.44202
2.64987	3.66022	4.30843
2.83545	3.13543	3.5546
2.56448	3.50805	2.88221
2.65015	3.34773	2.31805
2.86376	3.25747	3.75975
2.89584	2.91996	3.14266
2.74431	3.30089	3.31881
2.58942	3.2126	3.40105
2.71515	2.92139	3.08887
2.96182	3.28474	2.80149
3.1061	2.87227	2.58557
2.83003	3.39013	2.79886
2.65853	3.22043	3.88566
3.16406	3.15546	2.69939
2.53934	3.22705	3.10037
2.76793	3.10697	2.76381
2.78652	3.08073	3.59815
3.40307	3.54375	3.499
2.74986	3.21193	3.43375
2.47877	3.34468	3.5768
2.39816	2.95137	2.37445
3.12944	3.13044	2.84217
2.51657	3.06479	3.7055
2.70306	3.15884	2.64266
2.82489	3.116	2.84702
2.461	3.30223	4.01058
2.58037	3.12463	3.32025
2.84823	3.21966	4.00011
3.14904	3.25809	4.07074
3.26062	3.98931	3.47592
2.97993	3.35905	3.11345
2.41505	3.18569	2.32073
3.07169	2.9827	2.35818
2.63747	2.94057	3.05199
2.42921	3.41854	3.32848
2.71318	3.2548	2.90422
3.5371	3.47075	2.6072
2.48428	3.52816	3.72702
2.87798	3.01939	2.92496
2.76225	3.76213	3.16645
2.74375	3.01047	3.35823
2.6052	2.91173	2.79303
3.11967	3.4632	3.48407
2.78562	3.46114	3.78889
3.01957	3.63085	2.92124
2.66654	3.59203	2.29984
2.70287	3.35762	3.6117
2.98003	3.34206	3.4921
2.62907	3.23253	2.91235
2.75683	3.41104	2.62017
2.48914	2.99372	3.46525
3.28577	3.16205	3.17433
2.60903	3.28445	4.06131
2.93403	3.36565	2.1286
2.57354	3.56272	3.76723
2.71437	3.00503	3.31659
2.5574	3.50564	2.99303
2.82046	3.30098	4.07478
2.97447	3.66551	4.18749
2.8848	3.41266	2.48653
2.42282	3.37918	3.20067
2.69056	3.56078	3.2223
2.67695	2.89139	4.02366
2.83127	3.33368	3.68606
2.5256	3.68827	2.92714
2.80908	3.30445	2.87251
2.74168	3.31605	3.55744
2.42416	3.26758	3.12386
2.90251	3.58923	3.7825
2.82097	3.29906	3.14066
2.68206	3.23432	3.1463
2.43813	3.52665	2.57041
3.33634	3.04717	2.89879
2.78065	3.13535	3.07793
2.57223	3.32387	3.47449
2.66908	3.5128	3.17905
3.0944	3.13373	3.46094
2.84822	3.42549	2.6647
2.89588	3.39385	3.74834
2.76116	3.5087	2.44881
2.4532	3.10875	2.95148
2.71614	2.99531	3.74712
2.81969	3.5652	2.91803
2.99651	3.0734	3.22495
3.10475	3.54316	2.6973
3.03147	3.34639	2.44989
2.5039	3.36373	2.62387
2.2092	3.42904	3.96107
2.48351	3.31431	2.49095
2.3531	3.69002	2.75819
3.19405	3.03053	3.37444
2.36639	3.53806	3.06475
3.18574	3.22443	3.88405
3.17389	4.0435	2.09906
2.78971	3.24068	3.64932
3.51172	3.11526	2.87764
3.28906	3.42449	3.17482
2.92308	3.2721	3.42233
1.94047	3.76885	3.1932
3.14473	3.43462	3.61127
2.67338	3.24051	2.89544
2.90447	3.17119	2.51475
3.03159	3.6439	3.86462
2.79764	3.39925	3.30172
2.71224	3.05501	2.17011
2.61609	3.47158	2.11961
2.91413	3.06558	3.11266
2.69704	3.31038	2.46662
2.61065	3.64068	2.77495
2.95387	3.25633	3.51048
2.73295	3.66953	3.31517
2.72607	3.37656	2.84871
2.20589	3.01563	2.56393
2.58266	3.10304	2.42354
2.88374	3.46496	2.79827
2.84718	3.67567	3.4123
2.93001	3.18811	2.78184
2.94899	3.12654	3.26401
2.93023	3.24109	2.46229
3.01098	3.05981	2.3102
2.3922	3.56148	3.62256
2.82167	2.94501	3.48805
2.35715	2.86251	2.91669
2.86037	3.43109	3.94118
2.43306	3.45634	3.66763
2.54033	3.2307	3.52251
3.00053	3.36323	3.35254
3.01165	3.29672	3.31955
2.88309	3.02704	3.17726
2.57228	3.14161	3.17066
2.64273	3.25933	3.00463
2.76561	3.50501	3.71898
2.92065	2.64794	3.86801
2.66099	3.45632	3.0347
2.66966	3.26468	2.9001
3.15547	3.40149	2.98798
2.75734	3.11188	4.0156
2.94286	3.23881	3.22922
2.92692	3.43481	2.76716
2.53625	3.24048	2.63241
2.13333	3.0401	3.35169
2.8617	3.37496	3.03908
3.00464	3.21942	2.82607
2.67045	3.07528	2.35373
2.03138	3.37551	3.49476
3.09113	3.06989	2.35412
2.37676	3.78585	2.83519
2.21484	3.49098	3.5029
3.02044	3.0487	3.76178
2.58485	3.09122	2.16906
3.08706	3.28485	3.29485
2.39108	3.09611	3.73069
3.21217	3.15442	4.09043
3.04809	3.39352	3.94699
2.79686	3.41352	3.16297
2.61082	3.08815	3.30739
2.7857	3.28141	2.92295
2.88447	3.40767	3.80463
2.54765	3.24253	3.62223
2.79526	3.68164	3.20058
2.48219	3.21055	3.13118
2.72474	3.33624	2.93304
2.46785	3.65529	2.76482
2.91732	3.13191	3.94985
2.76917	3.4685	2.71453
2.75716	3.36309	2.46547
2.49482	3.23002	3.53744
2.62492	3.46142	2.65678
2.78389	3.51882	2.50884
2.81758	3.41794	2.95256
2.66115	3.45638	3.5929
2.78442	3.83596	2.89566
2.79241	3.25998	2.46172
2.66434	3.25896	3.12355
2.21121	3.31385	3.56607
2.72386	3.37834	2.7731
2.60582	3.35259	3.27212
2.36794	3.12847	2.22391
3.02568	3.3502	3.31618
2.20836	3.51564	3.43287
2.97216	3.12576	3.20991
2.84837	3.45145	2.80194
2.4066	3.12776	3.57337
2.9893	3.18407	2.6854
2.47976	3.20227	3.34843
2.7076	3.30741	2.95579
2.92334	3.16111	3.86376
2.44876	3.02181	3.6459
2.82427	3.51657	3.04258
2.73572	3.3219	3.10911
2.7066	2.8305	3.18222
2.58957	3.32279	3.6099
2.75882	2.89842	1.81083
2.78786	3.59032	3.56584
2.84889	3.02594	3.73998
3.16243	3.38368	2.53411
2.68956	3.42527	3.33486
2.74459	3.70053	3.10207
2.43205	3.57531	3.03218
3.1681	3.32421	2.97608
2.59983	2.84186	3.28008
2.88895	3.00049	2.91308
3.18092	3.61326	2.93724
3.11165	3.61395	3.01198
2.77669	3.31838	3.33875
2.42214	3.33327	3.27931
2.42179	3.33141	3.19514
2.63223	2.86	3.34295
2.99561	3.61458	2.56024
2.7729	3.388	3.72999
2.2523	3.18257	2.61088
2.37748	3.23785	3.11184
2.4981	2.71803	3.28203
3.13435	3.29352	3.4189
3.3087	3.35258	3.79742
2.79936	3.29783	3.3564
2.82445	3.35018	4.05425
2.81545	3.32144	3.44856
2.3897	2.79464	2.73415
2.96314	3.4297	3.39406
2.68188	3.22652	3.71578
2.764	3.50935	2.51443
2.711	3.71115	3.13868
3.06199	3.5035	3.15593
2.86903	3.30287	3.53562
2.98257	3.15532	2.75517
2.83378	3.24053	3.77294
3.1032	3.32989	3.76593
2.94607	3.19582	3.66619
2.7862	3.07244	3.10694
2.82049	3.14053	3.97003
2.36784	3.3408	2.8503
2.31262	3.33724	2.12175
2.50407	3.33641	2.95757
2.77317	3.61242	3.35714
2.98041	3.43666	3.71853
2.97066	3.39277	3.95392
2.28679	3.51469	2.87946
2.71555	3.22696	2.57723
2.76814	3.7855	3.49405
2.6092	3.1456	3.94049
2.03003	3.38807	2.64411
2.73879	3.2712	4.06528
2.6588	3.6833	3.64967
3.0909	3.17721	3.25028
2.52746	3.70207	3.12586
2.68178	3.12898	2.86352
2.78286	3.02964	3.3451
3.22422	3.33536	3.46437
2.65092	3.38609	2.65432
2.89297	3.40326	3.41914
2.69103	3.49737	4.0232
2.71354	3.25263	2.98191
2.53489	3.39907	3.19409
2.81943	3.44475	2.74795
2.823	3.19338	3.83696
2.9252	3.2287	3.55704
3.01353	3.41446	2.8158
2.00742	3.0873	3.57807
2.96271	3.63914	3.56357
2.95879	3.29033	3.55472
2.81178	2.86368	3.36856
2.61951	3.29502	2.69376
2.86075	3.56157	3.01442
2.60893	3.04462	2.71915
2.8956	3.56484	3.24071
2.7153	3.06153	2.92591
2.97421	2.84366	2.27699
2.99306	3.18955	3.8107
2.29651	2.99693	3.74326
2.15536	3.23331	3.00233
2.99097	3.1114	4.05522
3.07862	3.06896	3.89056
2.75902	3.0913	3.23638
3.04917	3.62192	3.36428
1.87327	3.2451	2.58574
2.70541	3.24402	3.6131
2.7091	3.37508	3.59834
2.72418	3.07946	3.39934
3.31275	3.12927	2.9409
2.91653	3.22553	3.48095
2.91089	3.06434	3.17729
3.23508	3.41558	3.15938
2.5005	3.40275	2.94704
2.66025	3.15558	3.70815
2.40927	3.39215	2.37394
2.45017	3.22691	2.73249
2.77745	3.53496	2.96329
3.13649	3.29553	2.50684
2.74742	3.44638	3.02739
2.99574	3.17709	2.51033
2.87868	3.22656	2.72458
2.26946	3.90108	2.83687
2.7949	3.62097	2.78529
2.89105	3.61724	2.53526
1.84052	3.27878	2.93569
2.7364	3.58942	3.00637
2.98303	3.12466	2.56564
2.73239	3.19699	3.74456
1.93023	3.31311	3.56275
3.26421	3.17016	2.9361
2.67215	3.40426	3.5226
3.04255	3.07429	3.32083
2.76898	3.27077	2.98985
2.95084	3.39076	2.28252
2.9379	3.18034	2.53678
2.60037	3.70517	2.60246
2.90183	3.33073	2.85152
2.66383	3.4061	2.8217
2.57767	3.04574	2.88089
3.14189	3.3538	3.34167
2.64108	3.32328	2.99012
2.93662	3.49178	3.07763
2.83656	3.27552	4.32635
2.73231	3.22639	2.91266
2.90435	2.97018	2.75389
2.50924	3.33214	3.19291
3.15149	3.15857	3.95406
2.79039	3.40177	3.48191
2.83807	3.11285	2.89044
2.89643	3.27279	3.2394
2.80577	3.47246	2.56293
3.04262	3.29567	4.04684
2.69975	3.39274	2.95104
2.73841	3.17496	3.0901
3.36365	3.34665	3.15215
2.91938	3.46527	3.1863
2.67027	3.18683	2.40272
2.81499	3.25651	2.88262
2.42496	3.41748	3.7786
2.95477	3.79654	3.21107
2.87931	3.40044	2.67373
3.02179	3.14774	2.72842
3.34742	3.44519	3.00388
3.03494	3.40001	2.96381
2.37601	3.54442	3.3892
2.76332	3.62605	3.8402
3.15506	3.3854	2.81144
2.64971	3.41636	3.51985
2.86762	3.42488	2.32719
2.86106	3.05128	3.55631
2.91988	3.37117	3.25087
3.17455	3.51847	2.73686
2.72072	3.34191	2.37474
2.51421	3.27176	2.81769
2.79526	3.07973	3.42649
2.827	3.06348	3.32138
2.97591	3.29193	2.3649
2.86758	3.0624	2.76492
2.61515	3.50027	3.83406
2.84087	3.39786	3.3584
2.70782	3.74042	2.47091
2.7507	3.0819	2.99772
2.71177	3.16513	2.57423
3.11755	3.27284	2.70342
2.51581	3.73693	3.22069
2.80361	2.99902	3.03647
3.11329	3.32361	3.10514
3.02377	3.15301	3.83497
2.8093	3.24157	3.00102
2.62106	3.40271	3.5899
2.30884	3.48847	2.53017
2.9297	3.26928	4.05529
2.35595	3.48542	3.35835
2.71781	3.37025	3.64574
2.72775	3.29094	3.48574
3.10412	2.99697	3.21003
2.73763	3.15393	3.93406
2.72441	3.13619	4.20156
2.5797	3.15799	3.36378
3.01378	3.32008	3.87986
2.947	3.12192	2.904
3.01123	3.66851	2.88307
2.47189	3.54477	3.00765
3.03324	3.63497	3.68141
2.9394	3.51689	3.885
2.72351	3.59642	3.11105
2.77185	3.2179	3.53072
2.69367	3.26055	3.68652
2.34853	3.26627	3.58951
2.8177	3.16549	3.03887
2.76213	3.43015	3.50301
3.01348	3.3508	2.96903
2.76064	3.50871	2.61297
2.63622	3.21269	2.08606
2.55145	3.02628	2.7747
2.72468	3.38828	2.80653
2.8722	3.32192	2.68815
2.81478	3.25266	3.39391
2.70321	3.26851	2.25397
2.4486	3.67688	3.69151
2.7107	2.93925	2.70747
2.72938	3.49005	3.44723
3.3615	2.8806	2.97739
3.35342	3.28713	3.13891
3.31941	3.30153	2.9003
2.87035	3.65271	2.66964
2.71616	3.77981	3.46264
2.87053	3.38767	3.3935
2.6635	3.21406	3.44823
2.78883	3.09102	2.10746
2.6956	3.06987	2.33372
2.53748	3.25572	2.99966
2.5939	3.42411	3.29444
2.89302	3.01773	4.2053
2.7052	3.31526	4.01006
2.66925	3.16131	2.94379
2.48318	3.37418	3.06436
2.75324	3.46088	2.72509
3.41536	3.32159	3.34084
3.58821	3.18203	2.77706
2.69226	3.68005	3.54281
2.426	3.54457	3.35792
2.57862	3.32431	2.84744
2.40998	3.22821	3.59799
3.15702	3.2248	3.53897
2.96259	3.28642	2.92482
2.92193	3.3844	3.36361
2.89109	3.37494	2.43222
2.88729	3.52624	3.09969
2.67834	3.68664	3.29509
2.8316	3.15041	3.70624
2.04217	3.12191	3.16304
2.43485	3.3888	3.01494
2.91893	3.48946	3.74124
3.10728	3.1102	3.46882
2.99312	3.38789	2.56654
2.53163	3.309	3.92804
2.98929	3.27612	3.14858
2.65617	3.25239	2.59373
2.57338	3.56312	2.91992
3.13231	3.00994	3.04577
2.67614	3.00417	2.94278
2.55683	3.43828	3.98964
2.65893	3.25498	2.08713
3.3196	3.38964	3.67908
2.59124	3.04422	2.49628
2.37881	3.50411	3.34484
2.61116	3.3089	3.71305
2.91138	3.03458	3.36057
2.84364	3.01697	3.07954
2.89737	3.20455	3.11599
2.77881	3.22405	3.4752
3.01348	3.50749	2.47588
2.60623	2.78862	2.63299
3.0279	3.60182	3.23758
2.58788	3.14642	2.83565
2.57889	3.13091	2.15593
2.53897	3.18769	2.30677
2.78026	3.3434	2.70016
2.68727	3.1943	2.50438
2.36911	2.90461	3.07311
2.89551	3.19748	3.53287
2.99683	3.06982	2.48494
2.46491	3.46916	2.38261
3.22498	3.47918	2.49484
2.8346	3.45181	3.90169
2.45066	3.40575	2.74955
2.35248	3.47663	3.00269
2.69117	3.2992	2.98215
2.65392	3.32712	3.22735
2.55284	2.90755	3.08386
2.99121	3.26176	3.22154
2.43677	2.34059	2.66078
2.16458	3.21563	2.79714
3.08708	3.28566	3.05512
2.99782	3.02636	2.96799
2.37949	2.86421	3.61115
2.74513	3.34484	2.39602
3.16547	3.41156	2.58533
2.72176	3.54028	3.91442
2.80347	3.3466	3.53805
2.71205	3.37122	3.1259
2.71723	3.62918	1.31121
2.99647	3.17969	3.9661
2.30553	3.35146	2.7424
2.75396	3.31982	2.53135
2.76404	3.46417	3.61296
2.19359	3.11396	3.42986
2.76167	3.67542	3.45943
2.95775	2.98699	2.52767
2.97075	2.95273	3.39482
2.71725	3.56948	2.76396
3.04678	3.46602	3.20698
2.58351	3.15502	3.02247
3.06229	3.02788	3.46169
2.75926	3.19863	3.71637
2.66514	3.48402	3.14828
2.63974	3.35724	2.68707
2.74137	3.01513	3.86583
2.30306	3.20999	3.45745
2.8757	2.82583	3.71512
2.73682	3.61334	2.84611
2.66216	3.17444	2.54477
2.72344	3.13493	3.57847
2.66212	3.52636	3.81927
3.07866	3.19953	3.67605
3.09384	3.43124	3.39024
2.50283	3.37209	3.01321
2.40577	3.43274	2.88435
2.96589	3.46871	2.85303
3.22828	3.39692	2.71659
2.70016	3.24095	2.90551
3.13976	3.14398	2.98147
3.00198	3.53292	2.78897
2.63299	2.9002	2.99864
3.01449	3.38429	3.51839
2.97868	3.54274	3.40046
2.89732	3.11229	3.21851
2.78876	3.21774	2.63145
2.87313	3.67348	3.73022
2.82908	3.30127	3.2317
3.284	3.16864	3.15047
2.88996	3.49801	3.34972
2.95419	3.12004	2.842
2.91998	2.83537	2.92216
2.58867	3.24663	3.29542
3.11013	3.20004	3.2206
2.95679	3.27932	3.8451
2.61403	3.22759	3.35632
2.54665	3.13932	2.73402
2.86988	2.93661	3.36034
2.44803	3.72211	2.91502
2.61152	3.15158	3.05367
3.06209	3.44777	3.61767
3.03258	3.42052	3.00559
1.91169	3.26164	3.26273
2.70486	3.53669	2.39266
2.81894	3.00016	3.42794
2.84126	3.36099	2.77034
2.98043	3.30106	2.26711
2.90543	3.29954	2.5834
2.38809	3.44259	3.04425
2.56715	3.16751	3.06803
2.88112	3.3077	3.07068
2.80846	3.23228	3.13966
2.76769	3.28407	3.06
2.87197	3.31915	2.36049
2.78505	3.2944	2.24498
2.97199	3.32801	3.1823
2.18361	3.27275	3.5875
1.7075	2.89563	3.09152
2.51672	3.22838	4.33927
2.79794	3.24466	2.85531
2.74235	3.57979	3.75067
2.3703	3.0946	2.21711
2.36603	3.34049	3.44005
2.62092	3.4666	2.68891
3.19567	3.09574	3.1385
3.41117	3.43509	2.25148
2.70713	3.74128	3.07253
2.53972	2.75305	2.49392
2.76969	3.10449	3.50397
3.26644	3.28635	3.17469
2.71333	3.32133	3.40909
2.17552	3.23054	3.27943
2.70312	3.73732	2.93456
2.91191	3.4505	2.80804
2.77134	3.27578	3.49719
2.95651	3.23924	4.02955
2.6642	3.52321	3.5745
2.97512	3.32293	3.17711
2.27347	3.59445	2.54705
3.10279	3.04043	2.49881
2.94066	3.12789	2.74289
2.61964	3.40329	3.58718
2.73519	2.94134	3.92708
2.74484	3.02179	2.36874
2.8187	3.3715	2.5139
2.88534	3.27098	3.15559
2.60788	3.58901	2.64701
3.01485	3.07425	2.71293
2.49217	3.54933	3.81273
2.57694	3.49492	2.8193
2.36181	3.36067	2.32907
1.82001	3.41543	3.47558
2.73531	3.28057	3.46597
2.63898	3.04176	2.73048
2.76282	3.1391	3.65966
2.74626	3.29385	3.29231
2.44401	3.18862	2.53238
2.87296	3.19409	3.53276
2.45494	3.17445	3.58198
2.55636	3.3251	2.83519
2.88576	3.05967	2.9513
2.74255	3.4105	3.60684
2.6764	3.21616	3.14753
2.80688	3.50692	3.54789
2.74586	3.27857	3.65325
3.08085	3.30179	4.05793
2.85368	3.41978	3.061
2.47288	3.73451	3.21343
3.04512	3.21354	3.10621
2.63852	3.27316	2.40553
2.88107	3.0863	2.2187
2.88925	3.16161	2.86337
2.53999	2.98006	2.95655
2.7679	3.06375	3.85515
3.0347	2.85157	3.47456
2.70452	2.84713	2.68057
2.59013	3.72677	3.37778
2.9113	3.19077	3.02601
2.30839	2.98347	3.14877
2.56574	3.35105	3.23367
3.11931	3.25815	2.47187
2.98031	3.24262	3.57309
2.54871	3.28846	3.62604
2.3482	3.3854	3.87126
2.74628	3.17208	2.31493
2.56868	2.97363	2.82916
2.80201	3.55893	3.10133
2.8675	3.32067	3.53626
2.73034	3.12667	3.85718
3.38984	3.02116	3.23582
2.55465	3.18955	1.89044
2.97247	3.44152	2.598
2.57332	3.51228	3.01847
2.91976	3.35101	2.92978
2.72573	3.88016	3.57951
3.00748	3.94966	2.16267
2.76739	3.17044	2.96028
3.12498	3.1985	3.41662
2.88222	3.26533	2.8272
2.49171	3.19124	2.78903
2.64136	3.22114	3.65002
2.7438	3.60988	3.77475
2.32467	2.76959	3.38354
1.99767	3.38152	3.21986
2.91726	3.521	2.41112
2.69549	3.20305	3.66279
2.63198	3.29282	3.18557
2.7723	3.08646	2.72688
2.88198	3.69139	3.09941
2.79687	3.09005	3.44992
2.5981	3.21128	4.07033
2.65025	2.88291	2.8624
2.80273	3.2614	2.30049
2.79742	3.05571	2.96577
2.51991	3.1635	3.28094
3.03321	3.36494	3.8952
2.87749	3.6213	3.8564
2.72432	3.17338	2.79213
2.74918	3.61932	2.83935
2.69772	3.056	3.42925
2.71967	3.5422	3.03408
3.02617	3.09904	3.39033
2.68145	3.12253	2.84857
3.02329	3.2777	3.28264
2.86371	3.29844	3.66498
2.75085	3.8788	3.01328
3.17739	3.50176	3.65143
2.58775	3.3624	2.8627
2.72814	3.254	2.45622
2.76931	2.87774	2.65786
2.44514	3.61062	2.64592
2.65616	3.20798	2.58601
2.66812	3.39901	2.21246
3.06145	3.16797	2.89578
2.81289	3.22443	3.29893
2.73994	3.23646	3.77032
2.93014	3.52858	3.68339
3.06042	3.12604	3.47614
2.47695	3.24271	2.7205
2.87207	3.6204	3.0821
2.52903	3.07206	2.23277
2.80669	3.17799	3.4738
2.70207	3.52414	2.24155
2.8418	3.18191	3.60954
2.89837	3.74448	3.06243
2.51114	3.07879	3.28561
2.20484	3.14295	2.82495
2.67417	3.22196	3.78588
2.71087	3.45083	1.77913
2.41562	3.20313	3.33143
3.03303	3.12336	3.31732
2.84554	3.17782	2.98297
2.30703	3.39741	4.00118
3.12864	3.787	3.042
2.76477	3.08211	3.53281
2.80037	3.31361	2.95481
2.38866	3.23285	3.51897
3.09416	3.23306	2.37323
2.79222	3.35704	2.30189
3.0876	3.3895	3.27982
2.69066	3.54632	2.50316
2.8772	3.27719	3.4008
3.36024	3.41744	2.91508
2.59068	3.36497	3.17386
2.70732	3.31688	3.30632
3.00182	3.39295	3.01756
3.15689	3.44091	3.39463
2.82238	3.25589	3.93367
2.72702	3.35043	3.14079
2.49682	3.29208	3.40633
2.29357	3.32134	2.70443
3.06931	3.26466	3.36276
2.65556	3.44287	3.24658
2.68796	3.18589	2.46741
3.01291	2.94416	2.10991
2.95095	3.44951	2.86763
2.68324	3.2712	3.32708
2.98959	3.13231	2.87479
3.17108	3.22523	3.56924
3.08754	2.93826	2.7768
3.08121	3.37342	2.53346
3.19146	3.55393	3.93389
2.37056	3.41991	3.02015
2.34603	3.45244	3.40838
2.50223	3.57273	3.47514
2.48039	3.37886	4.12753
2.55991	3.59305	2.58697
2.8218	3.35207	3.4158
2.8279	3.28069	2.97482
2.88799	3.26212	2.7103
2.84131	3.31875	2.26787
3.16589	3.58802	3.13292
2.27582	2.96869	2.92154
2.73658	3.04213	3.86239
2.81311	3.32403	2.99744
2.13005	3.14082	3.41897
3.17516	3.06345	2.68222
2.7355	3.39874	3.81487
2.67519	3.4282	3.34254
2.61742	3.49454	3.09529
3.18175	3.10701	3.03181
3.00677	3.21745	3.177
2.58051	3.39573	3.69412
2.6884	3.12753	3.40834
2.44429	3.40688	2.91502
2.62418	3.02161	3.97306
3.20494	3.53091	3.07781
3.11395	3.5539	2.81643
2.88903	3.35185	3.92914
3.24717	3.3573	3.738
2.68196	3.23964	2.47716
2.78136	3.2532	2.64014
2.92343	3.18768	1.4258
2.95628	3.02761	3.43857
3.01101	3.30131	3.21604
2.9812	3.36029	2.51634
2.65681	3.26126	3.92067
2.70423	3.61524	2.68869
2.62689	3.48201	3.51129
2.42789	3.13647	3.09634
2.61345	3.28609	2.6377
2.87946	2.85708	3.07526
3.07599	3.68512	2.86415
2.67568	3.41048	2.72783
2.52683	3.80426	2.15307
2.93486	3.60986	2.69857
3.20335	3.16364	2.97675
2.7417	3.13949	3.28781
2.7558	3.55496	3.32676
2.98164	3.19535	4.08888
2.83113	3.03385	3.08489
2.65254	3.13725	2.43192
2.42687	3.24709	2.85002
3.05058	3.22709	2.03431
2.63866	3.02949	3.79197
2.59448	2.95467	3.48202
2.77956	3.26469	2.98531
3.19124	3.03435	3.13468
2.8348	3.32971	2.56464
2.43711	3.32201	3.63872
2.76561	3.36981	3.83878
2.32925	3.15128	3.53302
2.83966	3.46631	3.04164
2.73354	3.15977	3.54557
3.25252	3.29472	3.31003
3.11382	3.18597	2.96445
2.77804	3.05256	3.37276
3.06474	3.419	4.09818
2.70899	3.46012	2.82427
2.92814	3.2491	3.58705
3.00745	3.2035	3.29403
3.05525	3.3018	2.45442
2.69423	3.08333	3.5788
2.77596	3.61012	3.43114
2.54818	3.09383	3.28667
2.783	3.3264	3.69971
2.34521	3.16648	2.47998
2.41233	3.39107	2.41712
2.96373	3.37734	2.31814
2.73294	3.4416	2.54384
2.57787	3.55384	2.95504
3.06836	3.81536	3.30077
2.69379	3.36076	2.91098
3.01946	3.47977	3.24698
2.8967	3.68367	3.22782
2.95451	3.18318	3.12294
2.48035	3.19002	2.68175
3.03782	3.12856	3.68949
2.36726	3.5226	3.26096
2.60262	3.54181	3.06825
2.91345	3.04496	2.21089
3.12053	3.23513	2.19003
2.77346	3.01008	2.82331
2.70343	3.3083	3.61752
2.79391	3.25182	2.90943
2.69767	3.10283	3.18967
2.72986	3.39531	3.07687
2.44216	3.25166	2.82357
3.02237	3.31193	2.44869
3.18861	3.29301	2.30453
2.90108	3.329	3.31273
2.40472	3.51945	2.73849
2.63679	3.29701	2.87636
2.88125	3.3499	2.94359
2.7294	3.23817	2.71511
2.64688	3.42308	2.61373
2.65921	3.22453	3.16931
3.03896	3.3079	4.07652
2.43208	3.32757	2.47744
2.67083	3.32529	2.986
2.88	3.44176	2.86609
3.07879	3.49634	3.73435
2.91963	3.25497	2.43487
2.88999	3.47257	3.55681
2.84358	3.23404	2.8546
3.13481	3.22218	2.20641
3.14313	3.12283	3.84775
2.50811	3.45667	3.47095
3.13383	3.07562	3.0303
2.93267	3.19376	3.53789
2.91553	3.87225	3.13992
2.38822	3.43184	3.09022
2.67005	3.23364	3.03645
3.65109	3.64568	1.86887
2.81567	3.31427	3.17934
2.93792	3.2495	3.50803
2.75962	3.39402	4.18391
2.63887	3.01817	3.19551
2.52412	3.14744	3.85648
2.39485	3.18748	2.3076
2.7379	2.86678	3.2987
2.88574	3.6837	4.04752
2.72278	3.24439	2.7187
2.8264	3.02366	2.94953
2.78336	3.28966	2.84071
2.53642	3.1488	3.3453
2.72614	3.91199	2.65921
3.16024	2.8977	3.70105
2.76984	3.19486	3.4353
3.06664	2.91373	2.58854
2.45022	3.2895	2.60691
3.01271	3.05607	3.30645
3.26338	3.52763	3.94829
2.61834	3.2516	3.53998
2.84639	3.21623	2.40144
2.79641	3.34549	2.35899
3.04968	3.35388	2.6014
2.93365	3.23786	3.89551
2.67515	3.18754	2.93508
3.16368	3.14682	3.63477
2.66836	3.50849	3.26549
3.15226	3.41132	3.62706
3.36928	3.34154	3.31887
2.61306	2.97083	4.12957
2.84471	3.19377	3.08467
2.50541	3.05205	3.35974
3.03261	3.39776	2.91137
2.53457	3.39923	3.22932
2.95347	3.37001	3.36864
2.5556	3.18571	3.47675
2.77323	3.43135	3.29429
2.89647	3.50753	3.31681
3.15953	3.43051	3.06761
2.99423	3.06839	3.86107
2.90955	3.43346	2.22961
3.10485	3.12695	3.23404
2.87002	3.41844	2.29956
2.59612	3.07262	3.64299
2.79514	3.31201	2.46684
2.44312	3.94715	3.42444
2.82281	2.941	3.23069
2.50232	3.22864	3.3014
2.84446	3.42429	2.61001
2.57209	2.97821	2.67162
3.00033	3.15161	2.384
2.63495	3.11669	3.47737
2.72472	2.83734	2.92417
2.66011	3.14741	2.91169
2.80661	3.36988	3.3168
3.18343	3.17175	3.03837
2.82272	3.10657	3.91351
2.54317	3.66283	3.79029
2.82164	3.25728	1.81398
2.65422	3.00348	3.21914
2.67765	3.4979	2.89532
2.97826	3.18155	3.34748
2.66404	2.99475	3.41588
2.47198	3.26058	3.45605
2.73138	3.17375	3.06596
2.62226	3.29711	3.04363
2.56343	3.34963	2.71013
2.4086	3.70238	3.51982
2.85634	3.77697	2.90824
2.70541	3.32043	2.91418
3.0764	3.00349	3.86734
2.92209	3.01807	3.46394
3.06364	3.43082	2.84361
2.73137	3.00845	3.15332
2.92622	3.33648	2.78138
2.91586	3.34243	2.65064
2.86946	3.40848	3.65669
2.48759	3.22137	2.61311
2.57356	3.20714	3.75698
3.07517	2.98427	3.48252
3.07441	3.3999	2.93929
2.69619	3.25165	3.03174
2.87634	3.13117	3.0963
2.92147	2.94287	3.50569
2.52404	3.29451	3.54689
2.69244	3.7921	3.15723
2.77319	3.50097	2.86207
2.94999	3.83455	3.68922
2.76736	3.04315	2.56831
2.77144	3.18213	3.65269
2.75364	3.22776	3.6358
3.00901	3.16792	4.12085
2.52995	3.53063	3.40638
2.28456	3.25048	2.50139
2.76469	3.06148	2.51539
3.09236	2.97608	2.65214
2.82608	3.39064	3.04699
2.14917	3.79254	3.07065
2.59413	3.27985	2.27325
3.27547	3.40558	3.40745
3.01763	3.0121	2.25014
2.93763	3.60637	2.76394
2.28803	3.02942	3.52788
2.77804	3.2333	3.16935
2.42539	3.34705	2.51388
2.94792	3.37293	2.96689
2.8494	3.47228	3.12142
2.27808	3.60744	3.04058
2.90483	3.18322	2.73848
2.58379	2.90856	3.20274
2.72841	3.19722	2.85081
3.31254	3.94056	3.45864
2.82794	3.57142	3.17375
2.51597	2.96237	3.57606
2.87482	2.96386	1.74701
2.72282	3.04784	3.24207
2.73948	3.35321	2.96169
2.6674	3.49185	2.28833
2.86898	3.28911	1.9857
2.51587	3.50399	4.04049
3.15657	3.35016	3.74756
2.97283	3.12767	2.35158
3.20171	3.04978	3.64157
3.14981	3.30758	2.74398
2.66801	3.33416	2.65923
2.8092	3.18622	3.01681
2.69153	3.44599	3.32603
3.46191	3.63894	3.75255
2.5636	3.55979	3.01269
2.83001	3.64057	2.85638
3.20816	3.82654	3.40481
2.35879	3.19564	3.2198
2.57609	2.88821	3.10585
2.92322	3.37212	2.66671
2.6558	3.6451	3.00409
2.67275	3.11682	3.52854
2.53062	3.61727	2.61405
2.86075	3.62484	2.30713
3.28661	3.05123	4.07896
2.66787	3.50557	3.22913
2.98019	3.18304	2.73637
2.60998	3.05982	3.47873
2.28176	3.04215	3.64103
3.03527	3.05187	3.15108
3.06627	3.31029	2.94036
1.74344	3.25686	2.84227
2.70169	3.99795	2.57552
2.67986	3.20269	2.64769
2.7682	3.49767	3.21178
2.80565	3.28323	3.36647
2.52011	3.31452	3.21627
2.49823	3.33516	3.14249
3.2365	3.32739	2.58107
2.80629	3.20217	3.02928
2.9432	3.19413	3.44954
2.31969	3.74762	3.02823
2.70607	3.05749	2.87581
3.06586	3.99883	3.60604
2.93497	3.57233	2.64156
2.62066	3.40236	3.64157
2.74418	3.41316	2.35868
2.20539	2.98227	3.13567
2.82248	3.66694	2.51157
2.79018	3.16703	3.52075
3.19468	3.24751	3.54843
2.75493	3.2334	3.02649
2.71724	3.04817	3.61289
2.58105	3.03588	2.53614
2.46259	3.35399	3.46812
2.73979	3.485	2.82831
2.50078	3.13959	2.07827
2.80047	3.55098	3.63979
2.51031	3.20316	4.04856
2.813	3.15787	3.46167
2.6015	3.06739	2.42794
2.83869	3.23889	2.72934
3.38998	3.22477	3.4389
2.72493	2.6929	3.37149
2.32278	3.28769	3.33296
2.48963	3.53976	2.71026
2.89601	3.34443	2.71878
2.7324	3.60593	3.37022
2.69874	3.8148	2.98897
2.81212	3.45367	3.0935
3.01866	2.97977	2.69544
2.6083	3.30196	3.88796
3.5106	3.26697	3.25817
2.66456	3.31221	3.61828
2.55446	3.0815	3.26042
2.69112	3.19367	3.46846
2.52748	2.78922	3.50056
2.7644	3.20452	2.40272
2.86038	3.21259	3.46901
2.69068	2.95052	2.51901
2.60163	3.32781	3.40405
2.96231	3.40856	2.91608
2.71464	2.76193	3.32518
3.14731	3.57234	2.98591
2.66214	2.86778	2.91303
2.70151	3.04674	2.73479
2.78439	3.53125	3.63045
2.7502	2.98929	3.13053
2.21226	3.49089	2.72212
2.71822	3.40431	2.83088
3.1385	3.43561	3.29078
2.96178	2.90228	3.15152
2.2356	3.46329	3.61759
2.65685	2.91476	2.9966
2.72452	3.57784	3.52837
3.26711	3.61459	3.64741
2.31384	3.26867	3.62686
2.83074	3.12963	3.24489
2.83448	3.65055	2.25287
2.55245	3.08904	3.00839
3.03601	3.30189	2.42289
2.58849	3.37991	3.30034
2.56275	3.52227	2.6029
2.89803	3.38332	2.40134
3.37242	3.13273	3.08117
2.99741	3.19824	3.23318
2.43067	3.51789	2.97073
2.49681	3.69632	3.7498
3.08478	3.02499	3.35177
2.70169	3.25187	3.09597
2.39706	3.07767	2.75586
2.24299	3.30438	3.31403
2.74223	3.44366	2.83893
2.695	3.213	3.64102
2.59711	3.44728	3.68895
2.74431	3.35037	3.619
2.88603	3.49204	3.15154
2.81622	3.26387	3.42911
2.94051	3.36782	2.62388
2.73146	3.44707	3.96885
3.04927	3.37998	3.0763
2.92951	3.13229	2.9171
2.89792	3.7958	3.3386
2.82038	3.31183	3.7699
2.64808	2.90048	2.49695
2.72665	3.23926	2.40286
2.63149	3.47079	2.59147
2.68461	3.41622	3.11628
2.58759	3.98225	3.45518
2.73734	3.25976	3.4899
3.13837	2.9362	3.85062
2.40572	3.30674	2.82501
2.87788	3.35397	3.52179
2.73891	3.62516	2.40275
3.03606	2.98691	2.17445
2.45029	3.09859	2.15694
3.11805	3.16933	4.29651
2.65877	3.86045	2.89218
2.22609	3.44934	2.1941
2.87264	3.35806	2.27848
2.88511	3.21202	2.73721
1.81437	3.55528	2.56836
2.55304	3.36202	2.98909
2.58574	3.28127	3.45198
2.61004	3.465	3.74737
2.97554	3.43813	3.03824
2.75846	3.2048	3.2522
2.65749	3.17247	3.39888
2.82379	3.43348	2.9687
2.65006	3.14722	2.84565
3.08822	3.14308	3.47971
2.36984	3.17242	3.46573
2.70638	3.48665	3.23018
2.68939	3.24268	3.44419
2.6949	3.13142	3.47812
2.50041	3.15769	3.36568
2.53688	3.2517	3.05352
2.90086	3.45535	2.9713
2.80525	3.178	3.2794
2.91853	3.1053	3.29534
3.0289	3.17347	3.3377
2.41716	3.27941	3.14725
2.80935	3.43157	2.84734
2.68946	3.38919	3.0119
2.82323	2.74506	2.56981
3.00917	3.31846	3.40889
2.70435	3.23981	3.02947
2.94084	3.12593	3.0673
2.31773	3.33002	3.16704
2.82788	3.08557	3.36821
2.72746	3.06107	3.01638
2.34352	3.34096	3.56339
2.89934	3.04059	3.20603
2.87073	3.17255	2.83949
1.76362	3.00727	3.69575
2.26032	3.32673	2.43277
2.74121	3.61483	3.10152
3.22966	3.10383	2.98359
2.86525	3.33129	3.88548
2.88997	2.91343	2.10558
3.27713	3.29204	3.73905
2.64789	3.39341	3.5982
3.34748	3.33277	4.40934
2.45203	3.17601	3.35749
2.56196	3.21048	2.60027
2.89139	3.31654	4.02147
2.39245	3.16003	2.94272
2.63324	3.36718	3.93124
2.2799	3.4561	2.68234
2.139	3.16192	2.99951
2.71549	3.32927	4.03675
2.62705	3.64531	2.97811
2.88135	3.17555	3.43092
3.11676	3.37191	3.77506
2.06518	3.2114	3.40846
2.39453	3.4218	3.60288
2.51089	3.49551	3.62282
2.83004	3.51049	3.44065
2.29117	3.2133	3.99815
2.72037	3.15243	3.25409
3.0741	3.14607	2.30942
2.78779	3.25224	2.88099
2.6881	2.93944	3.66701
2.68323	3.28597	2.20054
2.78242	3.74615	2.73457
2.57632	3.57069	3.39282
3.24589	3.16338	3.36106
2.58248	3.28487	3.26229
2.6934	3.34249	2.75375
2.47528	3.46911	3.94181
2.79761	3.33106	2.83494
2.80691	2.95724	3.74799
2.65684	3.04669	2.54712
2.07742	3.49687	2.99722
2.28416	3.16119	3.08081
3.16662	3.01893	2.94855
2.61781	3.68018	4.13226
2.77863	3.09912	3.05176
2.64814	3.1778	3.12689
3.02126	3.14484	2.2212
2.9977	3.59457	3.64927
2.81994	3.59892	2.0776
2.99045	3.18091	3.5717
2.42838	3.12947	2.80415
3.12012	3.33747	3.81689
2.57852	3.63906	3.61062
2.69427	3.10425	2.85957
2.43264	3.32939	3.20258
2.66049	3.20351	3.37664
2.93533	3.35086	3.96527
2.33678	2.95545	2.56438
2.8123	3.39848	2.94762
2.7563	3.41859	3.0761
2.75076	3.24873	2.6769
3.2816	3.12301	3.55274
2.78267	3.28657	3.12213
2.90321	3.10607	2.72962
2.83115	3.45332	2.58769
2.78786	3.2124	3.2506
3.1627	3.28761	2.4327
2.55859	2.92086	3.59745
2.87713	3.65067	3.49081
2.5235	3.25351	3.31374
2.38049	2.96342	2.7317
2.71119	2.98494	3.49423
2.61734	3.46295	3.37397
2.29757	3.29138	3.52105
2.66525	3.16193	3.26528
2.8781	3.44683	3.29355
2.77471	2.95193	2.78373
2.45861	3.59864	3.25998
2.50836	2.83692	2.95353
2.36097	3.20537	3.21946
2.5509	3.74897	2.36522
2.65324	3.08187	3.48116
2.66376	3.23067	2.06318
2.46642	3.27195	2.74575
2.80646	3.68808	3.99366
3.01336	2.97467	2.72531
2.33603	3.57517	2.26039
2.8443	3.40094	2.81068
2.99192	3.21258	3.21474
2.45881	3.34639	2.49174
2.79085	3.21891	3.31789
3.31962	3.34204	3.22429
2.7945	3.27608	2.76866
2.88485	3.40535	3.73678
2.95831	3.22562	3.58277
2.40957	3.02111	4.28763
2.86075	3.29676	3.23126
2.8685	3.44704	3.72299
3.28794	3.1194	3.42074
2.55947	3.03001	3.14067
2.86534	3.30972	3.01075
2.48218	3.24162	2.89632
2.73249	3.39558	3.71443
2.66312	3.58642	3.45043
3.09394	3.24068	3.18475
3.48446	3.03176	2.65732
3.06264	3.32963	2.88333
3.47234	3.40949	3.27981
3.13401	3.54497	3.686
2.25367	3.30497	2.56156
3.04308	3.20239	3.52297
2.70149	3.26716	3.60027
2.03271	3.09171	3.69843
2.69943	3.65828	3.43539
2.95533	3.16279	2.60104
3.04586	3.05005	2.76964
2.81984	3.55468	3.59602
2.65071	3.1501	3.12367
3.15503	3.18695	3.81986
2.72932	3.20407	3.36125
2.12109	3.04511	3.05312
2.18522	3.18301	2.98331
2.41268	3.26976	3.40518
2.13675	3.28404	3.21529
3.02681	3.19277	2.32469
2.77456	3.2988	3.18521
2.74952	3.24939	2.67813
2.75408	3.02702	2.5211
2.0865	3.37783	3.64051
3.24151	3.31233	3.03942
3.08248	3.2193	3.10223
2.54764	3.49885	3.88024
2.3826	3.29497	2.32709
3.22636	3.28828	2.91349
3.03552	3.24113	3.30549
3.34286	3.10684	3.25724
2.29623	2.87893	3.22898
2.51589	3.98245	2.70779
2.40776	3.69717	2.71397
2.54527	3.56302	2.50498
2.81062	3.23029	2.71976
2.86311	3.36054	3.52855
2.99332	3.19974	3.27309
2.75352	3.16737	3.74418
2.35342	2.78271	3.73656
1.82668	3.3249	3.50054
2.58406	3.3137	2.62326
2.81462	3.60643	3.47913
2.73209	3.13404	3.99754
2.94217	3.10342	2.24493
2.58857	3.12892	3.34964
2.45169	3.02864	2.90783
2.8835	3.21057	2.37814
3.04791	3.36475	3.11598
3.03657	3.52987	2.85524
[truncated: 16,039 more rows]

## Sheet: Fig.1j
Fig. 1j. APC_BCL-2 expression (log10) in the co-cultured cells
U937 MF	THC	DU145
2.82716	3.3116	3.16054
3.07871	3.14047	3.07955
3.30011	3.42298	2.99961
2.82312	3.14832	2.57661
3.06382	3.09039	2.77784
2.63397	3.38859	3.3077
2.79772	3.33764	3.72467
2.80468	3.19062	2.61285
2.43191	3.08907	3.08128
2.16962	2.88734	3.92799
2.81891	3.26102	3.94528
2.43373	3.25062	2.65035
2.6016	2.90983	2.95178
2.90433	3.1009	4.26493
3.01816	3.29032	3.27463
2.40735	3.23742	3.38155
2.53702	3.18008	2.90415
2.58881	3.34756	3.19636
3.14744	2.87782	2.89394
2.76984	3.2268	3.44797
2.58889	3.6538	3.21669
2.67998	4.02453	3.32856
2.92989	3.23139	2.93759
3.26964	3.10163	3.21118
2.95409	3.39576	3.08343
2.8902	3.28864	3.67645
3.06414	3.43642	2.99508
2.79713	3.26793	3.53169
2.56859	3.53735	3.15818
2.67211	3.3973	3.63328
2.25905	3.38814	1.79319
2.46162	3.21523	3.11023
2.45584	3.36881	3.52423
3.09563	3.01897	2.48237
2.74848	3.35169	3.11758
2.45188	3.17994	3.62365
2.71769	3.09592	3.29736
2.77342	3.32208	3.0271
2.54195	3.18512	2.08919
2.50564	3.42938	3.48888
2.73873	3.34179	3.02267
2.64048	3.17521	2.89587
3.11326	3.65374	2.97082
2.60543	3.16786	4.09167
2.88503	3.2395	3.14102
2.68807	3.54315	3.47983
2.43721	3.222	3.08755
2.80987	3.25982	2.19983
2.53567	3.18295	3.06693
3.03668	3.00045	3.22378
2.57446	3.52405	2.84072
3.64093	3.31155	3.17018
2.75455	3.72992	3.21182
3.31094	3.40506	3.13388
2.69819	3.58443	3.11225
2.7061	3.33895	3.01824
2.51416	3.46439	2.70484
3.01188	3.30333	3.09379
2.68293	3.49526	3.21055
3.00816	3.41649	3.85595
2.53482	3.15933	2.47065
2.94941	3.36409	3.61689
2.77246	3.40715	2.87911
2.23471	3.16041	2.92525
2.65299	3.40881	3.83158
2.50843	3.43824	2.38394
2.86914	3.64031	2.89671
3.48108	3.5584	2.76504
2.71224	3.24796	2.46641
2.84435	3.54437	3.02402
2.83568	3.67346	3.29697
2.58698	3.20579	2.7812
2.84708	3.39072	2.7914
3.09083	3.18892	3.41998
2.98446	3.34004	3.18552
2.5212	3.382	2.20079
2.38439	3.04892	3.21994
2.44837	2.89957	3.59343
2.75261	3.48946	2.85783
2.91905	3.10733	2.91746
2.76699	3.222	2.81806
2.7837	3.19248	3.30985
2.89801	3.06318	3.58118
2.69615	2.94555	3.45641
2.75538	3.45756	3.17313
2.9607	3.35143	2.94105
3.24307	3.43997	3.0602
2.50917	2.89081	4.03263
2.58728	2.72242	3.19036
2.96664	3.72946	2.40039
2.78966	3.16406	3.08651
3.07168	3.19484	2.78676
2.99481	3.62011	2.80388
2.56823	3.24289	3.72323
3.06145	3.33044	3.21463
2.9344	3.27748	3.27199
2.42407	3.33282	3.07956
2.97699	3.20051	3.12682
2.7382	3.23274	3.65799
3.26531	3.32712	3.74864
2.72799	3.01885	3.27813
2.7287	3.14194	2.53248
2.77739	3.27058	2.83762
2.62381	2.95155	3.52311
2.69818	3.1227	3.90772
2.55488	3.11181	3.0856
2.65862	3.22477	3.28542
2.76862	3.38816	3.86269
3.05226	2.99217	2.70731
2.60455	3.44742	3.20888
2.86379	3.26102	2.84649
3.18502	3.37097	2.79745
2.86678	2.89421	3.79273
2.83724	3.20855	3.20876
2.71358	3.67654	2.34913
2.5471	3.42157	3.25626
2.90735	2.81243	3.42348
2.89743	3.15293	3.41591
2.76775	3.41134	3.19164
3.02619	4.08306	3.71366
2.42298	3.37602	3.32702
2.37191	3.16651	2.16531
2.69251	3.29964	3.46708
2.25918	3.55925	2.99178
2.41208	3.05055	4.00777
2.56776	3.23456	2.79152
2.71971	3.19398	2.56532
2.79223	3.36342	3.55199
3.02865	3.33946	2.11533
2.87647	3.54526	2.623
3.27518	3.26442	3.06983
2.52888	3.28173	2.98056
2.88681	3.45902	2.44337
2.61621	3.88396	3.14669
2.76946	2.88386	2.9267
2.52599	3.49005	2.19882
2.41438	3.33173	3.10723
3.09669	3.81851	2.452
3.21009	3.39937	2.66528
3.12242	3.23197	3.40984
2.4424	3.25515	2.7448
3.0174	3.64222	2.63394
2.42566	3.46269	3.25394
2.7367	3.49868	3.35289
2.76152	3.27082	3.93267
2.45331	3.97136	2.94723
2.98892	3.29397	3.27953
2.7901	3.20659	3.41729
2.68445	2.73341	3.57711
2.91331	3.4601	2.76506
2.71007	3.06918	2.45593
2.68275	3.28872	3.00219
3.17785	3.44376	2.47966
2.6408	3.25799	3.34264
2.60806	3.54234	2.4431
2.83579	2.95027	3.45684
2.53042	3.34396	2.253
3.05537	3.18034	4.01727
2.79388	3.52435	2.61683
2.90858	3.15354	3.92059
3.16281	2.8784	2.59264
2.67132	3.23554	2.75748
2.38441	3.59547	2.63023
2.84125	2.98426	2.6094
2.65225	2.96608	3.02769
2.67539	3.36117	3.39624
2.37328	3.34902	3.49461
2.4286	3.19214	3.07639
2.94391	3.21739	3.16428
2.76116	3.20144	2.67285
2.9468	3.63442	3.18027
2.7103	2.71768	3.22551
2.64441	3.33822	2.79004
3.10404	3.39505	3.27286
3.41206	3.32898	3.40648
3.4691	3.39854	3.65077
2.54802	3.62099	3.78942
2.37582	3.19951	3.38503
2.95845	3.13274	2.78103
2.77736	2.92052	3.36883
2.88958	2.86314	3.31113
3.08002	3.6978	3.00241
2.80799	3.0905	3.67218
3.05026	3.03006	3.51513
2.64567	3.2408	3.10757
2.64962	3.56631	2.99065
2.64125	3.4587	3.5972
2.63225	3.47141	3.98029
2.80465	3.17045	2.76355
2.7985	3.19245	2.84585
2.63325	3.58841	2.63404
2.78824	3.20942	3.1463
2.69996	3.1438	3.36955
3.21689	3.28093	3.3992
2.89357	3.00758	3.23996
2.26138	3.25264	3.46769
3.49382	3.15715	2.59255
2.96903	3.05774	2.5598
2.79964	3.33656	2.79377
2.68859	3.76889	3.25874
2.67586	2.75855	2.63677
2.57743	3.71672	3.59204
2.53141	3.29248	3.71669
2.72006	3.31389	3.04006
2.79672	3.29194	3.96841
2.64794	3.28383	3.91253
2.58203	3.28438	3.15923
2.79289	3.33603	3.4794
2.79169	3.17759	2.19038
2.74861	3.46587	3.34467
3.01372	3.34791	3.50572
2.4321	3.16351	2.94968
3.04494	3.20268	3.34691
2.67431	3.37985	2.97928
2.72786	3.18778	2.97563
3.06896	3.07675	3.18561
3.17723	3.13156	3.06373
2.91806	3.2294	3.31196
2.56608	3.27017	2.91004
3.02897	3.61755	3.07193
2.76788	3.11828	2.9798
2.70264	3.29335	2.99799
2.72762	3.15238	3.84378
3.10542	3.20856	3.43854
2.84514	3.33442	3.95234
2.10189	3.66197	3.37865
2.54515	3.22888	3.98422
3.21802	3.22241	2.89878
2.93429	3.34761	3.33429
2.59641	3.55105	3.61004
3.15452	3.31335	3.45331
2.66201	3.29459	3.14727
2.88274	3.63779	4.09174
2.81723	3.30286	2.74793
2.61412	3.0006	3.1405
2.81613	3.31472	3.66
2.71829	3.49839	3.47068
2.75414	3.18173	3.34852
3.30915	3.38428	3.83113
2.24022	3.15297	3.70307
2.58931	3.21795	3.12059
2.48689	3.02909	2.99633
2.73221	3.33851	2.68756
2.72256	3.13675	3.03013
2.40483	3.19623	3.44744
2.96389	3.29676	3.03831
2.73855	3.2496	3.62591
2.86109	3.17913	2.82765
2.9278	3.49754	2.62532
2.86535	3.32605	3.97167
2.79405	3.24735	3.44818
2.29689	3.34328	3.32545
2.65735	3.22715	3.78792
2.95395	3.10669	2.72429
2.65356	3.46615	3.20221
2.49399	3.23739	3.17529
2.99794	3.07993	2.92412
2.78829	3.24772	2.14193
2.81603	3.69269	2.03935
2.58369	3.04173	2.98992
2.71647	3.46361	3.4072
2.615	3.76216	3.19728
2.57905	3.01777	2.7056
2.51712	3.41009	3.60341
3.12606	3.23386	2.85021
2.72703	2.8995	2.89827
2.94114	3.0497	2.95088
2.54468	3.52331	2.81592
3.28939	3.27948	3.46536
3.07628	3.26483	2.25011
3.45347	3.12366	3.70145
3.08037	2.98806	2.6077
2.44512	3.51249	3.43877
2.86236	3.19934	2.66335
2.56196	3.24211	2.14394
2.68237	3.06044	3.21594
2.64322	3.7182	3.2448
2.78125	3.38274	3.64482
2.96632	3.11128	3.45839
2.48977	3.13931	3.32382
3.3694	3.33999	2.48858
2.24938	3.39582	2.13989
3.17331	3.13221	2.86717
3.0257	3.45873	3.55363
2.98904	3.60943	3.96601
2.89022	3.41892	3.28755
2.79425	3.16176	2.6756
2.77078	3.35106	2.9771
2.83726	3.35038	3.49253
2.82306	3.18784	3.39649
2.66762	3.47814	3.56239
3.04651	3.37036	2.64653
3.07607	3.76576	3.88222
2.88996	3.32253	2.88206
2.50267	3.73617	3.90987
2.25724	3.21402	3.27586
3.14469	3.71319	2.81144
2.94335	3.40328	3.22854
2.61957	2.99772	2.03601
3.00413	3.22939	2.64926
2.58059	4.00874	2.01574
3.32566	3.59724	2.08307
2.86568	3.17163	3.26514
3.06919	3.20857	2.55989
3.85366	3.18313	2.81864
3.04866	3.45751	2.83072
2.42839	3.42261	3.24807
2.70344	3.36452	2.53165
2.69429	3.43243	3.27849
2.08443	2.99037	2.8534
2.8994	3.94969	2.69936
2.99457	3.1737	3.20558
2.78681	3.53607	4.04782
2.81551	3.2561	3.31229
2.81379	3.0629	2.37654
2.69886	3.3001	4.40009
2.58849	3.12332	2.60519
2.78185	3.08493	3.26934
2.9491	3.00886	3.84527
2.80718	3.58429	3.43827
2.974	2.99989	3.47895
2.97363	3.1072	3.44755
3.08436	3.21751	2.60777
2.38203	3.27173	3.26487
2.52559	3.5497	2.75906
2.68919	3.30098	2.6424
2.3853	3.45111	3.53976
2.58702	3.41715	2.34755
2.68293	3.67085	3.71288
2.76837	3.27142	3.10978
2.44727	3.42781	2.64976
3.05149	3.63066	3.45841
3.25054	3.42679	2.65691
2.74333	3.34725	3.72761
2.90393	3.16471	3.09052
2.77318	3.47911	3.08457
2.60531	3.32477	3.87712
2.98745	3.18746	3.2086
2.52167	3.06177	3.06474
2.85197	3.271	2.42062
2.61452	3.28856	3.50807
2.92975	2.94651	3.12269
2.73924	3.47447	2.98489
2.54433	3.49368	4.00428
2.18455	3.19203	3.3206
2.31065	2.91484	2.89541
3.08932	3.22718	3.71081
2.8543	3.63399	3.64378
2.81239	3.50789	2.8116
2.93287	2.87938	3.25167
3.0637	3.332	2.57976
2.62938	3.37799	3.51332
2.58958	3.35343	3.24059
2.79091	3.36725	2.73297
2.35939	3.52995	3.09396
2.84493	3.60972	3.78644
3.12429	3.18847	2.60322
2.75459	3.48359	3.24294
2.99463	3.26371	3.44534
3.08296	3.33271	3.77406
2.33188	3.41378	2.69599
2.69969	3.35992	3.33041
2.60502	3.27598	2.96856
2.83307	3.37758	3.21721
2.74334	3.41802	3.6135
2.89671	3.46043	3.11133
2.89548	3.2495	2.95534
2.80085	3.40631	3.09401
2.89276	3.33491	3.66024
2.67727	2.91857	2.91839
2.72391	3.27258	3.12808
3.16802	3.31046	3.00709
2.57523	3.34247	0.368984
3.22456	2.9085	2.15729
2.27196	3.35479	2.64437
3.00516	2.95698	3.69195
2.89126	3.25211	2.87912
2.97587	3.37703	3.27402
2.92207	3.20667	3.5842
2.87746	3.13926	2.46778
2.84362	2.92226	4.08718
2.79401	3.0942	2.91442
2.08783	3.1102	3.87134
2.57652	3.27436	2.90037
3.00036	3.52143	2.41063
2.57904	3.47019	2.90555
2.73285	3.59694	2.3825
3.04431	2.97355	3.78749
2.87278	3.40711	3.61933
3.13796	3.16687	3.53525
2.93756	3.09443	2.67556
2.72835	2.98375	3.38545
2.68129	3.34167	2.6845
2.72245	3.09052	3.50456
2.68388	3.37864	2.43647
2.46933	3.15342	3.56989
3.04766	3.31619	3.40518
2.50807	3.17923	3.76327
2.63668	3.24561	3.23824
2.51194	3.52338	1.825
2.44716	3.19326	3.39198
2.52633	3.21698	3.72344
2.26885	3.40772	2.69449
2.94169	3.46826	3.17752
2.84555	3.35627	2.90367
2.87912	3.73044	2.45864
2.65082	2.84782	3.02371
2.28425	3.09398	2.94203
2.63335	3.1964	3.17878
2.59911	3.0292	3.91471
2.8358	3.43027	3.33296
2.59018	3.49003	3.34337
3.13148	3.19812	2.79849
3.00828	3.43443	3.31709
3.01608	3.38343	3.20641
2.56269	3.21454	3.15081
2.98467	3.48327	2.39646
2.76367	3.08115	3.50475
2.66128	3.32708	2.67531
2.37893	3.52666	2.03282
2.68454	3.18422	3.43718
2.96678	3.3893	3.04621
2.88773	3.4454	3.06412
2.67448	3.13893	3.6377
2.63596	3.43149	4.02637
3.14839	3.21938	3.63899
2.51231	3.7776	3.36569
2.51214	3.19455	2.25418
2.53656	3.26481	3.28524
2.68374	3.08302	2.49362
2.74197	3.31365	3.07404
2.69184	3.28075	2.79043
2.65524	3.50753	2.90954
2.75212	3.22305	3.95395
2.70281	3.31097	3.0435
2.58432	3.23885	3.82408
2.54647	2.8274	2.91069
2.6209	3.307	3.1972
2.72062	3.04833	3.41155
2.65476	3.27571	2.72718
2.45071	3.28697	3.01
2.70024	3.23474	2.79747
2.94669	3.33012	3.1159
2.87232	3.56904	3.00019
2.68014	3.35438	3.39768
2.6491	3.53616	2.40586
2.8691	3.42069	3.61626
3.33497	3.3039	3.75349
2.82849	3.15467	2.67913
2.78689	3.8917	2.69194
2.91279	3.28296	3.374
2.80466	3.92574	1.75607
2.44854	3.39907	3.47386
2.54298	3.36101	3.34117
2.88356	3.17224	2.78096
2.74092	3.55682	2.95262
3.19777	3.17838	3.0606
3.07848	3.3838	3.21613
3.0051	3.57677	3.43634
2.4841	3.40213	3.62457
3.09129	3.12241	3.65077
2.85972	2.93234	3.3531
2.79343	3.01288	3.06784
3.07428	3.70032	2.88552
2.96299	3.3712	4.16637
2.72751	3.01235	3.18761
2.89335	3.17889	2.72385
2.48434	3.7163	3.42971
2.80927	3.41719	2.94902
2.87556	3.1232	3.32045
2.88754	2.90542	2.41053
2.75272	2.98474	3.50495
2.72812	3.10491	3.59472
2.79805	3.28473	3.87126
2.74245	3.19207	3.49662
3.08485	3.05289	3.41809
2.60435	3.3345	3.24642
2.70264	2.88215	3.45486
2.93252	3.28363	3.27137
2.86314	3.40217	2.6537
2.73604	2.93321	3.16653
2.76528	3.27136	2.92489
3.18128	3.28358	3.10502
2.84444	3.42602	3.43093
2.98315	3.43968	3.57643
2.20947	3.24115	3.14864
2.6868	3.46645	2.91503
2.44352	3.14116	3.36371
2.61015	3.34558	3.45146
2.5234	2.98531	2.80786
3.12738	3.62017	3.24906
3.03511	3.30036	3.80042
2.47338	3.88729	2.67196
2.64157	3.40291	3.50287
2.715	3.05827	3.03585
3.02751	3.29577	3.95131
2.42976	3.39712	3.46086
2.93172	3.76021	1.92227
3.15051	3.00069	2.90099
2.49749	3.13418	2.63556
2.78198	3.37356	3.56979
2.44178	3.1496	2.46076
2.88918	3.20238	3.02145
2.34431	3.14882	3.64864
2.80133	3.11134	2.95979
2.69413	3.43093	2.02337
2.78505	3.54043	3.35143
2.85986	2.7864	2.39578
3.15382	3.83915	3.41175
2.78929	3.27776	3.69329
2.9528	3.53917	2.80744
2.97811	3.62618	2.26639
2.42781	3.51975	2.81774
2.62372	3.46452	2.51934
3.14167	3.21073	2.90233
2.6956	2.95064	3.30151
2.30638	3.11848	3.93285
2.86327	3.32595	2.63467
2.99124	2.98947	2.47801
3.1382	3.18832	3.11589
2.7012	3.70196	3.19174
2.80698	3.42719	3.21408
2.94601	3.55395	3.03496
2.55844	3.13021	2.94944
2.35337	3.50947	4.03645
2.57377	3.12035	3.42225
2.61524	3.11807	2.87778
2.87553	3.20271	3.03566
3.03331	3.00153	3.44548
2.66728	3.47673	3.56705
3.04731	3.05063	3.7941
3.15224	3.59226	2.00109
2.73211	3.11768	2.56088
2.8228	3.56789	2.89885
3.0023	3.37331	2.71565
2.73022	3.1184	2.7074
2.90511	3.10821	2.4051
3.04397	3.1946	2.86757
3.38683	3.15671	2.04666
3.01082	3.45458	2.31193
2.88327	3.38022	2.26548
2.54914	3.0955	3.24137
2.28156	3.09677	3.42529
3.1851	3.33639	3.52485
2.46059	3.19269	2.34435
2.85111	3.03897	3.26652
2.72602	3.16533	2.30219
2.88275	3.1581	3.69199
2.47206	3.28017	2.46506
2.70309	2.96329	2.59674
2.866	3.29543	3.29472
2.68852	3.19208	3.06611
3.16	3.52932	2.8107
2.36616	3.50034	2.61144
2.66813	3.40684	3.91525
2.55992	3.27676	3.83457
2.65658	3.54247	3.09577
2.58571	2.98405	3.41749
2.63936	2.99847	2.77682
2.86419	3.1178	2.95193
2.21907	2.95626	3.14071
3.31781	3.18411	2.83533
2.88379	3.11379	3.14488
2.90105	3.12383	2.72443
2.5642	3.33354	3.13858
2.92562	3.16984	3.7879
3.14977	3.37773	4.16938
2.87871	3.38118	2.04257
2.60382	3.20271	3.25872
3.08682	3.25532	2.77284
2.55807	3.2389	3.47742
3.14469	3.42219	3.40227
2.621	3.23999	2.25074
2.86078	2.82489	3.84328
2.4647	3.28557	3.47828
2.30765	3.57161	3.41618
2.51915	3.46679	2.68584
2.58939	3.25823	3.7732
2.76729	3.40536	2.67239
2.75358	3.28845	4.04361
2.74873	3.41765	3.00176
2.94693	3.40131	2.47727
1.68823	3.19198	2.8518
2.75502	3.5929	2.6273
2.93438	3.18851	2.97565
2.51229	3.21122	2.73912
3.31337	3.21305	3.52308
3.233	3.37193	2.30866
2.69147	3.22117	2.58181
3.50212	3.07958	3.74635
2.82656	3.21289	2.42171
3.10105	2.98817	3.26834
2.7271	3.75025	2.62329
2.66441	3.27029	2.75793
2.56977	3.29819	3.66843
2.77881	3.61436	3.90387
2.96754	3.26164	2.74236
2.93375	3.34392	3.5568
2.91168	2.8675	2.42445
2.4055	3.57614	3.31309
2.41627	3.34697	2.55199
2.47708	3.56472	2.66251
2.50221	3.23684	2.88075
2.57659	3.45386	2.07687
2.93625	3.35938	3.09292
2.71889	3.00308	3.09434
2.78541	3.46898	2.7732
2.35725	3.47092	2.22023
2.01383	3.20997	2.82483
2.69078	3.09372	2.66926
2.89804	3.35199	2.60145
2.94684	3.37952	2.84024
2.6046	3.16394	3.18146
2.77464	3.02684	2.98044
2.75001	3.42306	2.83883
3.12122	3.36093	3.019
2.49782	3.12944	2.6985
2.54724	3.20728	3.93459
2.64169	3.06148	2.46672
2.72769	3.27403	3.189
2.23331	3.30304	1.91501
3.06121	3.10066	3.07276
2.76142	3.39855	2.83303
2.50114	3.22653	3.77893
2.53357	2.94862	2.31237
2.92974	3.18058	3.26023
2.91723	3.35047	3.95153
2.81823	3.17005	3.46151
2.63942	3.35145	2.2104
2.47549	2.53114	2.55542
2.9819	3.28866	2.7065
2.73094	3.27747	3.33529
2.65654	3.55509	2.9081
3.00182	3.32888	2.5094
3.31161	3.46553	2.54505
2.52801	3.55953	2.66241
3.02774	3.23317	3.60234
2.4051	3.04594	3.14861
2.85065	3.23554	3.05281
2.57637	3.34215	3.06841
2.74311	3.02613	2.88382
2.99213	3.24933	3.45673
2.57901	3.4301	2.79012
2.66118	3.95639	2.10494
2.4753	3.44877	2.75126
2.3644	3.02003	2.78437
2.75497	3.05407	3.52431
3.01408	3.48313	3.60989
2.53679	3.45726	3.19644
2.47875	3.41424	2.63209
2.62113	3.47308	3.77422
3.0126	3.23055	4.13361
2.87539	3.11188	3.33184
3.05833	3.51365	2.92091
2.97377	2.83062	2.92683
2.81909	3.15988	3.60544
2.82162	3.19269	3.5399
3.12536	3.21496	2.84202
2.58299	3.07119	3.13743
2.70138	3.19176	2.36595
2.69052	3.16761	2.64665
2.52461	3.28991	2.97117
2.52548	3.19764	3.5726
2.64088	3.67494	2.60812
3.01052	3.13578	3.11861
3.01386	3.41236	4.04521
2.65803	3.34316	3.27291
2.68113	3.0952	3.73789
2.5519	3.39674	4.08282
2.67024	3.45318	3.39701
2.83582	3.20119	2.49058
2.7118	3.26763	2.60603
2.91638	3.12824	3.1768
2.49888	3.41382	4.06872
2.42507	3.39817	4.2024
2.9406	3.64923	2.77405
2.47444	3.22347	2.21587
3.07826	2.87505	3.6191
2.63288	3.12187	4.03499
2.64089	3.39818	4.4026
2.57835	3.59342	3.64083
2.95502	3.36211	2.97616
2.74117	3.06641	3.10659
2.9511	3.86887	3.13172
2.69449	3.27444	3.5137
2.91538	3.04229	3.23273
2.6922	3.89852	2.69496
2.59641	2.75745	3.21999
2.57894	3.027	1.82904
2.65531	3.41927	2.78744
2.7948	3.09352	2.71736
2.50233	3.01086	2.63579
2.64701	3.52961	2.74982
2.57931	2.92404	2.56277
3.10291	3.31254	4.06963
2.66231	3.16568	2.90279
2.96519	3.19916	3.45
2.72007	3.12982	3.26232
3.28508	3.58236	2.99108
3.09575	3.32397	3.62674
2.60054	3.15883	2.65722
2.52615	3.28627	2.77853
2.8588	2.84923	3.79325
2.68779	3.244	3.67557
3.00242	3.19518	2.65249
2.7945	3.76663	3.32191
2.60827	3.74207	2.82019
2.33537	3.21197	2.56261
3.1437	3.09275	3.7817
2.93255	3.07793	3.69859
2.90721	3.4218	3.90265
2.65265	3.55229	2.31422
3.22915	3.21498	2.80754
2.68147	3.04985	3.14931
2.36177	3.36608	2.9784
2.90213	3.35673	3.48749
2.74644	3.12142	3.5333
3.11959	3.26141	3.28723
2.61181	2.99398	2.79359
2.82359	3.35262	3.70698
2.85196	3.06674	2.71178
3.14628	3.32695	2.65601
2.48721	3.43252	2.21809
3.0213	3.28714	2.00562
2.90035	3.8149	3.44977
2.65317	3.17924	2.84567
2.95353	3.40871	3.40242
2.82961	3.00779	2.44202
2.64987	3.66022	4.30843
2.83545	3.13543	3.5546
2.56448	3.50805	2.88221
2.65015	3.34773	2.31805
2.86376	3.25747	3.75975
2.89584	2.91996	3.14266
2.74431	3.30089	3.31881
2.58942	3.2126	3.40105
2.71515	2.92139	3.08887
2.96182	3.28474	2.80149
3.1061	2.87227	2.58557
2.83003	3.39013	2.79886
2.65853	3.22043	3.88566
3.16406	3.15546	2.69939
2.53934	3.22705	3.10037
2.76793	3.10697	2.76381
2.78652	3.08073	3.59815
3.40307	3.54375	3.499
2.74986	3.21193	3.43375
2.47877	3.34468	3.5768
2.39816	2.95137	2.37445
3.12944	3.13044	2.84217
2.51657	3.06479	3.7055
2.70306	3.15884	2.64266
2.82489	3.116	2.84702
2.461	3.30223	4.01058
2.58037	3.12463	3.32025
2.84823	3.21966	4.00011
3.14904	3.25809	4.07074
3.26062	3.98931	3.47592
2.97993	3.35905	3.11345
2.41505	3.18569	2.32073
3.07169	2.9827	2.35818
2.63747	2.94057	3.05199
2.42921	3.41854	3.32848
2.71318	3.2548	2.90422
3.5371	3.47075	2.6072
2.48428	3.52816	3.72702
2.87798	3.01939	2.92496
2.76225	3.76213	3.16645
2.74375	3.01047	3.35823
2.6052	2.91173	2.79303
3.11967	3.4632	3.48407
2.78562	3.46114	3.78889
3.01957	3.63085	2.92124
2.66654	3.59203	2.29984
2.70287	3.35762	3.6117
2.98003	3.34206	3.4921
2.62907	3.23253	2.91235
2.75683	3.41104	2.62017
2.48914	2.99372	3.46525
3.28577	3.16205	3.17433
2.60903	3.28445	4.06131
2.93403	3.36565	2.1286
2.57354	3.56272	3.76723
2.71437	3.00503	3.31659
2.5574	3.50564	2.99303
2.82046	3.30098	4.07478
2.97447	3.66551	4.18749
2.8848	3.41266	2.48653
2.42282	3.37918	3.20067
2.69056	3.56078	3.2223
2.67695	2.89139	4.02366
2.83127	3.33368	3.68606
2.5256	3.68827	2.92714
2.80908	3.30445	2.87251
2.74168	3.31605	3.55744
2.42416	3.26758	3.12386
2.90251	3.58923	3.7825
2.82097	3.29906	3.14066
2.68206	3.23432	3.1463
2.43813	3.52665	2.57041
3.33634	3.04717	2.89879
2.78065	3.13535	3.07793
2.57223	3.32387	3.47449
2.66908	3.5128	3.17905
3.0944	3.13373	3.46094
2.84822	3.42549	2.6647
2.89588	3.39385	3.74834
2.76116	3.5087	2.44881
2.4532	3.10875	2.95148
2.71614	2.99531	3.74712
2.81969	3.5652	2.91803
2.99651	3.0734	3.22495
3.10475	3.54316	2.6973
3.03147	3.34639	2.44989
2.5039	3.36373	2.62387
2.2092	3.42904	3.96107
2.48351	3.31431	2.49095
2.3531	3.69002	2.75819
3.19405	3.03053	3.37444
2.36639	3.53806	3.06475
3.18574	3.22443	3.88405
3.17389	4.0435	2.09906
2.78971	3.24068	3.64932
3.51172	3.11526	2.87764
3.28906	3.42449	3.17482
2.92308	3.2721	3.42233
1.94047	3.76885	3.1932
3.14473	3.43462	3.61127
2.67338	3.24051	2.89544
2.90447	3.17119	2.51475
3.03159	3.6439	3.86462
2.79764	3.39925	3.30172
2.71224	3.05501	2.17011
2.61609	3.47158	2.11961
2.91413	3.06558	3.11266
2.69704	3.31038	2.46662
2.61065	3.64068	2.77495
2.95387	3.25633	3.51048
2.73295	3.66953	3.31517
2.72607	3.37656	2.84871
2.20589	3.01563	2.56393
2.58266	3.10304	2.42354
2.88374	3.46496	2.79827
2.84718	3.67567	3.4123
2.93001	3.18811	2.78184
2.94899	3.12654	3.26401
2.93023	3.24109	2.46229
3.01098	3.05981	2.3102
2.3922	3.56148	3.62256
2.82167	2.94501	3.48805
2.35715	2.86251	2.91669
2.86037	3.43109	3.94118
2.43306	3.45634	3.66763
2.54033	3.2307	3.52251
3.00053	3.36323	3.35254
3.01165	3.29672	3.31955
2.88309	3.02704	3.17726
2.57228	3.14161	3.17066
2.64273	3.25933	3.00463
2.76561	3.50501	3.71898
2.92065	2.64794	3.86801
2.66099	3.45632	3.0347
2.66966	3.26468	2.9001
3.15547	3.40149	2.98798
2.75734	3.11188	4.0156
2.94286	3.23881	3.22922
2.92692	3.43481	2.76716
2.53625	3.24048	2.63241
2.13333	3.0401	3.35169
2.8617	3.37496	3.03908
3.00464	3.21942	2.82607
2.67045	3.07528	2.35373
2.03138	3.37551	3.49476
3.09113	3.06989	2.35412
2.37676	3.78585	2.83519
2.21484	3.49098	3.5029
3.02044	3.0487	3.76178
2.58485	3.09122	2.16906
3.08706	3.28485	3.29485
2.39108	3.09611	3.73069
3.21217	3.15442	4.09043
3.04809	3.39352	3.94699
2.79686	3.41352	3.16297
2.61082	3.08815	3.30739
2.7857	3.28141	2.92295
2.88447	3.40767	3.80463
2.54765	3.24253	3.62223
2.79526	3.68164	3.20058
2.48219	3.21055	3.13118
2.72474	3.33624	2.93304
2.46785	3.65529	2.76482
2.91732	3.13191	3.94985
2.76917	3.4685	2.71453
2.75716	3.36309	2.46547
2.49482	3.23002	3.53744
2.62492	3.46142	2.65678
2.78389	3.51882	2.50884
2.81758	3.41794	2.95256
2.66115	3.45638	3.5929
2.78442	3.83596	2.89566
2.79241	3.25998	2.46172
2.66434	3.25896	3.12355
2.21121	3.31385	3.56607
2.72386	3.37834	2.7731
2.60582	3.35259	3.27212
2.36794	3.12847	2.22391
3.02568	3.3502	3.31618
2.20836	3.51564	3.43287
2.97216	3.12576	3.20991
2.84837	3.45145	2.80194
2.4066	3.12776	3.57337
2.9893	3.18407	2.6854
2.47976	3.20227	3.34843
2.7076	3.30741	2.95579
2.92334	3.16111	3.86376
2.44876	3.02181	3.6459
2.82427	3.51657	3.04258
2.73572	3.3219	3.10911
2.7066	2.8305	3.18222
2.58957	3.32279	3.6099
2.75882	2.89842	1.81083
2.78786	3.59032	3.56584
2.84889	3.02594	3.73998
3.16243	3.38368	2.53411
2.68956	3.42527	3.33486
2.74459	3.70053	3.10207
2.43205	3.57531	3.03218
3.1681	3.32421	2.97608
2.59983	2.84186	3.28008
2.88895	3.00049	2.91308
3.18092	3.61326	2.93724
3.11165	3.61395	3.01198
2.77669	3.31838	3.33875
2.42214	3.33327	3.27931
2.42179	3.33141	3.19514
2.63223	2.86	3.34295
2.99561	3.61458	2.56024
2.7729	3.388	3.72999
2.2523	3.18257	2.61088
2.37748	3.23785	3.11184
2.4981	2.71803	3.28203
3.13435	3.29352	3.4189
3.3087	3.35258	3.79742
2.79936	3.29783	3.3564
2.82445	3.35018	4.05425
2.81545	3.32144	3.44856
2.3897	2.79464	2.73415
2.96314	3.4297	3.39406
2.68188	3.22652	3.71578
2.764	3.50935	2.51443
2.711	3.71115	3.13868
3.06199	3.5035	3.15593
2.86903	3.30287	3.53562
2.98257	3.15532	2.75517
2.83378	3.24053	3.77294
3.1032	3.32989	3.76593
2.94607	3.19582	3.66619
2.7862	3.07244	3.10694
2.82049	3.14053	3.97003
2.36784	3.3408	2.8503
2.31262	3.33724	2.12175
2.50407	3.33641	2.95757
2.77317	3.61242	3.35714
2.98041	3.43666	3.71853
2.97066	3.39277	3.95392
2.28679	3.51469	2.87946
2.71555	3.22696	2.57723
2.76814	3.7855	3.49405
2.6092	3.1456	3.94049
2.03003	3.38807	2.64411
2.73879	3.2712	4.06528
2.6588	3.6833	3.64967
3.0909	3.17721	3.25028
2.52746	3.70207	3.12586
2.68178	3.12898	2.86352
2.78286	3.02964	3.3451
3.22422	3.33536	3.46437
2.65092	3.38609	2.65432
2.89297	3.40326	3.41914
2.69103	3.49737	4.0232
2.71354	3.25263	2.98191
2.53489	3.39907	3.19409
2.81943	3.44475	2.74795
2.823	3.19338	3.83696
2.9252	3.2287	3.55704
3.01353	3.41446	2.8158
2.00742	3.0873	3.57807
2.96271	3.63914	3.56357
2.95879	3.29033	3.55472
2.81178	2.86368	3.36856
2.61951	3.29502	2.69376
2.86075	3.56157	3.01442
2.60893	3.04462	2.71915
2.8956	3.56484	3.24071
2.7153	3.06153	2.92591
2.97421	2.84366	2.27699
2.99306	3.18955	3.8107
2.29651	2.99693	3.74326
2.15536	3.23331	3.00233
2.99097	3.1114	4.05522
3.07862	3.06896	3.89056
2.75902	3.0913	3.23638
3.04917	3.62192	3.36428
1.87327	3.2451	2.58574
2.70541	3.24402	3.6131
2.7091	3.37508	3.59834
2.72418	3.07946	3.39934
3.31275	3.12927	2.9409
2.91653	3.22553	3.48095
2.91089	3.06434	3.17729
3.23508	3.41558	3.15938
2.5005	3.40275	2.94704
2.66025	3.15558	3.70815
2.40927	3.39215	2.37394
2.45017	3.22691	2.73249
2.77745	3.53496	2.96329
3.13649	3.29553	2.50684
2.74742	3.44638	3.02739
2.99574	3.17709	2.51033
2.87868	3.22656	2.72458
2.26946	3.90108	2.83687
2.7949	3.62097	2.78529
2.89105	3.61724	2.53526
1.84052	3.27878	2.93569
2.7364	3.58942	3.00637
2.98303	3.12466	2.56564
2.73239	3.19699	3.74456
1.93023	3.31311	3.56275
3.26421	3.17016	2.9361
2.67215	3.40426	3.5226
3.04255	3.07429	3.32083
2.76898	3.27077	2.98985
2.95084	3.39076	2.28252
2.9379	3.18034	2.53678
2.60037	3.70517	2.60246
2.90183	3.33073	2.85152
2.66383	3.4061	2.8217
2.57767	3.04574	2.88089
3.14189	3.3538	3.34167
2.64108	3.32328	2.99012
2.93662	3.49178	3.07763
2.83656	3.27552	4.32635
2.73231	3.22639	2.91266
2.90435	2.97018	2.75389
2.50924	3.33214	3.19291
3.15149	3.15857	3.95406
2.79039	3.40177	3.48191
2.83807	3.11285	2.89044
2.89643	3.27279	3.2394
2.80577	3.47246	2.56293
3.04262	3.29567	4.04684
2.69975	3.39274	2.95104
2.73841	3.17496	3.0901
3.36365	3.34665	3.15215
2.91938	3.46527	3.1863
2.67027	3.18683	2.40272
2.81499	3.25651	2.88262
2.42496	3.41748	3.7786
2.95477	3.79654	3.21107
2.87931	3.40044	2.67373
3.02179	3.14774	2.72842
3.34742	3.44519	3.00388
3.03494	3.40001	2.96381
2.37601	3.54442	3.3892
2.76332	3.62605	3.8402
3.15506	3.3854	2.81144
2.64971	3.41636	3.51985
2.86762	3.42488	2.32719
2.86106	3.05128	3.55631
2.91988	3.37117	3.25087
3.17455	3.51847	2.73686
2.72072	3.34191	2.37474
2.51421	3.27176	2.81769
2.79526	3.07973	3.42649
2.827	3.06348	3.32138
2.97591	3.29193	2.3649
2.86758	3.0624	2.76492
2.61515	3.50027	3.83406
2.84087	3.39786	3.3584
2.70782	3.74042	2.47091
2.7507	3.0819	2.99772
2.71177	3.16513	2.57423
3.11755	3.27284	2.70342
2.51581	3.73693	3.22069
2.80361	2.99902	3.03647
3.11329	3.32361	3.10514
3.02377	3.15301	3.83497
2.8093	3.24157	3.00102
2.62106	3.40271	3.5899
2.30884	3.48847	2.53017
2.9297	3.26928	4.05529
2.35595	3.48542	3.35835
2.71781	3.37025	3.64574
2.72775	3.29094	3.48574
3.10412	2.99697	3.21003
2.73763	3.15393	3.93406
2.72441	3.13619	4.20156
2.5797	3.15799	3.36378
3.01378	3.32008	3.87986
2.947	3.12192	2.904
3.01123	3.66851	2.88307
2.47189	3.54477	3.00765
3.03324	3.63497	3.68141
2.9394	3.51689	3.885
2.72351	3.59642	3.11105
2.77185	3.2179	3.53072
2.69367	3.26055	3.68652
2.34853	3.26627	3.58951
2.8177	3.16549	3.03887
2.76213	3.43015	3.50301
3.01348	3.3508	2.96903
2.76064	3.50871	2.61297
2.63622	3.21269	2.08606
2.55145	3.02628	2.7747
2.72468	3.38828	2.80653
2.8722	3.32192	2.68815
2.81478	3.25266	3.39391
2.70321	3.26851	2.25397
2.4486	3.67688	3.69151
2.7107	2.93925	2.70747
2.72938	3.49005	3.44723
3.3615	2.8806	2.97739
3.35342	3.28713	3.13891
3.31941	3.30153	2.9003
2.87035	3.65271	2.66964
2.71616	3.77981	3.46264
2.87053	3.38767	3.3935
2.6635	3.21406	3.44823
2.78883	3.09102	2.10746
2.6956	3.06987	2.33372
2.53748	3.25572	2.99966
2.5939	3.42411	3.29444
2.89302	3.01773	4.2053
2.7052	3.31526	4.01006
2.66925	3.16131	2.94379
2.48318	3.37418	3.06436
2.75324	3.46088	2.72509
3.41536	3.32159	3.34084
3.58821	3.18203	2.77706
2.69226	3.68005	3.54281
2.426	3.54457	3.35792
2.57862	3.32431	2.84744
2.40998	3.22821	3.59799
3.15702	3.2248	3.53897
2.96259	3.28642	2.92482
2.92193	3.3844	3.36361
2.89109	3.37494	2.43222
2.88729	3.52624	3.09969
2.67834	3.68664	3.29509
2.8316	3.15041	3.70624
2.04217	3.12191	3.16304
2.43485	3.3888	3.01494
2.91893	3.48946	3.74124
3.10728	3.1102	3.46882
2.99312	3.38789	2.56654
2.53163	3.309	3.92804
2.98929	3.27612	3.14858
2.65617	3.25239	2.59373
2.57338	3.56312	2.91992
3.13231	3.00994	3.04577
2.67614	3.00417	2.94278
2.55683	3.43828	3.98964
2.65893	3.25498	2.08713
3.3196	3.38964	3.67908
2.59124	3.04422	2.49628
2.37881	3.50411	3.34484
2.61116	3.3089	3.71305
2.91138	3.03458	3.36057
2.84364	3.01697	3.07954
2.89737	3.20455	3.11599
2.77881	3.22405	3.4752
3.01348	3.50749	2.47588
2.60623	2.78862	2.63299
3.0279	3.60182	3.23758
2.58788	3.14642	2.83565
2.57889	3.13091	2.15593
2.53897	3.18769	2.30677
2.78026	3.3434	2.70016
2.68727	3.1943	2.50438
2.36911	2.90461	3.07311
2.89551	3.19748	3.53287
2.99683	3.06982	2.48494
2.46491	3.46916	2.38261
3.22498	3.47918	2.49484
2.8346	3.45181	3.90169
2.45066	3.40575	2.74955
2.35248	3.47663	3.00269
2.69117	3.2992	2.98215
2.65392	3.32712	3.22735
2.55284	2.90755	3.08386
2.99121	3.26176	3.22154
2.43677	2.34059	2.66078
2.16458	3.21563	2.79714
3.08708	3.28566	3.05512
2.99782	3.02636	2.96799
2.37949	2.86421	3.61115
2.74513	3.34484	2.39602
3.16547	3.41156	2.58533
2.72176	3.54028	3.91442
2.80347	3.3466	3.53805
2.71205	3.37122	3.1259
2.71723	3.62918	1.31121
2.99647	3.17969	3.9661
2.30553	3.35146	2.7424
2.75396	3.31982	2.53135
2.76404	3.46417	3.61296
2.19359	3.11396	3.42986
2.76167	3.67542	3.45943
2.95775	2.98699	2.52767
2.97075	2.95273	3.39482
2.71725	3.56948	2.76396
3.04678	3.46602	3.20698
2.58351	3.15502	3.02247
3.06229	3.02788	3.46169
2.75926	3.19863	3.71637
2.66514	3.48402	3.14828
2.63974	3.35724	2.68707
2.74137	3.01513	3.86583
2.30306	3.20999	3.45745
2.8757	2.82583	3.71512
2.73682	3.61334	2.84611
2.66216	3.17444	2.54477
2.72344	3.13493	3.57847
2.66212	3.52636	3.81927
3.07866	3.19953	3.67605
3.09384	3.43124	3.39024
2.50283	3.37209	3.01321
2.40577	3.43274	2.88435
2.96589	3.46871	2.85303
3.22828	3.39692	2.71659
2.70016	3.24095	2.90551
3.13976	3.14398	2.98147
3.00198	3.53292	2.78897
2.63299	2.9002	2.99864
3.01449	3.38429	3.51839
2.97868	3.54274	3.40046
2.89732	3.11229	3.21851
2.78876	3.21774	2.63145
2.87313	3.67348	3.73022
2.82908	3.30127	3.2317
3.284	3.16864	3.15047
2.88996	3.49801	3.34972
2.95419	3.12004	2.842
2.91998	2.83537	2.92216
2.58867	3.24663	3.29542
3.11013	3.20004	3.2206
2.95679	3.27932	3.8451
2.61403	3.22759	3.35632
2.54665	3.13932	2.73402
2.86988	2.93661	3.36034
2.44803	3.72211	2.91502
2.61152	3.15158	3.05367
3.06209	3.44777	3.61767
3.03258	3.42052	3.00559
1.91169	3.26164	3.26273
2.70486	3.53669	2.39266
2.81894	3.00016	3.42794
2.84126	3.36099	2.77034
2.98043	3.30106	2.26711
2.90543	3.29954	2.5834
2.38809	3.44259	3.04425
2.56715	3.16751	3.06803
2.88112	3.3077	3.07068
2.80846	3.23228	3.13966
2.76769	3.28407	3.06
2.87197	3.31915	2.36049
2.78505	3.2944	2.24498
2.97199	3.32801	3.1823
2.18361	3.27275	3.5875
1.7075	2.89563	3.09152
2.51672	3.22838	4.33927
2.79794	3.24466	2.85531
2.74235	3.57979	3.75067
2.3703	3.0946	2.21711
2.36603	3.34049	3.44005
2.62092	3.4666	2.68891
3.19567	3.09574	3.1385
3.41117	3.43509	2.25148
2.70713	3.74128	3.07253
2.53972	2.75305	2.49392
2.76969	3.10449	3.50397
3.26644	3.28635	3.17469
2.71333	3.32133	3.40909
2.17552	3.23054	3.27943
2.70312	3.73732	2.93456
2.91191	3.4505	2.80804
2.77134	3.27578	3.49719
2.95651	3.23924	4.02955
2.6642	3.52321	3.5745
2.97512	3.32293	3.17711
2.27347	3.59445	2.54705
3.10279	3.04043	2.49881
2.94066	3.12789	2.74289
2.61964	3.40329	3.58718
2.73519	2.94134	3.92708
2.74484	3.02179	2.36874
2.8187	3.3715	2.5139
2.88534	3.27098	3.15559
2.60788	3.58901	2.64701
3.01485	3.07425	2.71293
2.49217	3.54933	3.81273
2.57694	3.49492	2.8193
2.36181	3.36067	2.32907
1.82001	3.41543	3.47558
2.73531	3.28057	3.46597
2.63898	3.04176	2.73048
2.76282	3.1391	3.65966
2.74626	3.29385	3.29231
2.44401	3.18862	2.53238
2.87296	3.19409	3.53276
2.45494	3.17445	3.58198
2.55636	3.3251	2.83519
2.88576	3.05967	2.9513
2.74255	3.4105	3.60684
2.6764	3.21616	3.14753
2.80688	3.50692	3.54789
2.74586	3.27857	3.65325
3.08085	3.30179	4.05793
2.85368	3.41978	3.061
2.47288	3.73451	3.21343
3.04512	3.21354	3.10621
2.63852	3.27316	2.40553
2.88107	3.0863	2.2187
2.88925	3.16161	2.86337
2.53999	2.98006	2.95655
2.7679	3.06375	3.85515
3.0347	2.85157	3.47456
2.70452	2.84713	2.68057
2.59013	3.72677	3.37778
2.9113	3.19077	3.02601
2.30839	2.98347	3.14877
2.56574	3.35105	3.23367
3.11931	3.25815	2.47187
2.98031	3.24262	3.57309
2.54871	3.28846	3.62604
2.3482	3.3854	3.87126
2.74628	3.17208	2.31493
2.56868	2.97363	2.82916
2.80201	3.55893	3.10133
2.8675	3.32067	3.53626
2.73034	3.12667	3.85718
3.38984	3.02116	3.23582
2.55465	3.18955	1.89044
2.97247	3.44152	2.598
2.57332	3.51228	3.01847
2.91976	3.35101	2.92978
2.72573	3.88016	3.57951
3.00748	3.94966	2.16267
2.76739	3.17044	2.96028
3.12498	3.1985	3.41662
2.88222	3.26533	2.8272
2.49171	3.19124	2.78903
2.64136	3.22114	3.65002
2.7438	3.60988	3.77475
2.32467	2.76959	3.38354
1.99767	3.38152	3.21986
2.91726	3.521	2.41112
2.69549	3.20305	3.66279
2.63198	3.29282	3.18557
2.7723	3.08646	2.72688
2.88198	3.69139	3.09941
2.79687	3.09005	3.44992
2.5981	3.21128	4.07033
2.65025	2.88291	2.8624
2.80273	3.2614	2.30049
2.79742	3.05571	2.96577
2.51991	3.1635	3.28094
3.03321	3.36494	3.8952
2.87749	3.6213	3.8564
2.72432	3.17338	2.79213
2.74918	3.61932	2.83935
2.69772	3.056	3.42925
2.71967	3.5422	3.03408
3.02617	3.09904	3.39033
2.68145	3.12253	2.84857
3.02329	3.2777	3.28264
2.86371	3.29844	3.66498
2.75085	3.8788	3.01328
3.17739	3.50176	3.65143
2.58775	3.3624	2.8627
2.72814	3.254	2.45622
2.76931	2.87774	2.65786
2.44514	3.61062	2.64592
2.65616	3.20798	2.58601
2.66812	3.39901	2.21246
3.06145	3.16797	2.89578
2.81289	3.22443	3.29893
2.73994	3.23646	3.77032
2.93014	3.52858	3.68339
3.06042	3.12604	3.47614
2.47695	3.24271	2.7205
2.87207	3.6204	3.0821
2.52903	3.07206	2.23277
2.80669	3.17799	3.4738
2.70207	3.52414	2.24155
2.8418	3.18191	3.60954
2.89837	3.74448	3.06243
2.51114	3.07879	3.28561
2.20484	3.14295	2.82495
2.67417	3.22196	3.78588
2.71087	3.45083	1.77913
2.41562	3.20313	3.33143
3.03303	3.12336	3.31732
2.84554	3.17782	2.98297
2.30703	3.39741	4.00118
3.12864	3.787	3.042
2.76477	3.08211	3.53281
2.80037	3.31361	2.95481
2.38866	3.23285	3.51897
3.09416	3.23306	2.37323
2.79222	3.35704	2.30189
3.0876	3.3895	3.27982
2.69066	3.54632	2.50316
2.8772	3.27719	3.4008
3.36024	3.41744	2.91508
2.59068	3.36497	3.17386
2.70732	3.31688	3.30632
3.00182	3.39295	3.01756
3.15689	3.44091	3.39463
2.82238	3.25589	3.93367
2.72702	3.35043	3.14079
2.49682	3.29208	3.40633
2.29357	3.32134	2.70443
3.06931	3.26466	3.36276
2.65556	3.44287	3.24658
2.68796	3.18589	2.46741
3.01291	2.94416	2.10991
2.95095	3.44951	2.86763
2.68324	3.2712	3.32708
2.98959	3.13231	2.87479
3.17108	3.22523	3.56924
3.08754	2.93826	2.7768
3.08121	3.37342	2.53346
3.19146	3.55393	3.93389
2.37056	3.41991	3.02015
2.34603	3.45244	3.40838
2.50223	3.57273	3.47514
2.48039	3.37886	4.12753
2.55991	3.59305	2.58697
2.8218	3.35207	3.4158
2.8279	3.28069	2.97482
2.88799	3.26212	2.7103
2.84131	3.31875	2.26787
3.16589	3.58802	3.13292
2.27582	2.96869	2.92154
2.73658	3.04213	3.86239
2.81311	3.32403	2.99744
2.13005	3.14082	3.41897
3.17516	3.06345	2.68222
2.7355	3.39874	3.81487
2.67519	3.4282	3.34254
2.61742	3.49454	3.09529
3.18175	3.10701	3.03181
3.00677	3.21745	3.177
2.58051	3.39573	3.69412
2.6884	3.12753	3.40834
2.44429	3.40688	2.91502
2.62418	3.02161	3.97306
3.20494	3.53091	3.07781
3.11395	3.5539	2.81643
2.88903	3.35185	3.92914
3.24717	3.3573	3.738
2.68196	3.23964	2.47716
2.78136	3.2532	2.64014
2.92343	3.18768	1.4258
2.95628	3.02761	3.43857
3.01101	3.30131	3.21604
2.9812	3.36029	2.51634
2.65681	3.26126	3.92067
2.70423	3.61524	2.68869
2.62689	3.48201	3.51129
2.42789	3.13647	3.09634
2.61345	3.28609	2.6377
2.87946	2.85708	3.07526
3.07599	3.68512	2.86415
2.67568	3.41048	2.72783
2.52683	3.80426	2.15307
2.93486	3.60986	2.69857
3.20335	3.16364	2.97675
2.7417	3.13949	3.28781
2.7558	3.55496	3.32676
2.98164	3.19535	4.08888
2.83113	3.03385	3.08489
2.65254	3.13725	2.43192
2.42687	3.24709	2.85002
3.05058	3.22709	2.03431
2.63866	3.02949	3.79197
2.59448	2.95467	3.48202
2.77956	3.26469	2.98531
3.19124	3.03435	3.13468
2.8348	3.32971	2.56464
2.43711	3.32201	3.63872
2.76561	3.36981	3.83878
2.32925	3.15128	3.53302
2.83966	3.46631	3.04164
2.73354	3.15977	3.54557
3.25252	3.29472	3.31003
3.11382	3.18597	2.96445
2.77804	3.05256	3.37276
3.06474	3.419	4.09818
2.70899	3.46012	2.82427
2.92814	3.2491	3.58705
3.00745	3.2035	3.29403
3.05525	3.3018	2.45442
2.69423	3.08333	3.5788
2.77596	3.61012	3.43114
2.54818	3.09383	3.28667
2.783	3.3264	3.69971
2.34521	3.16648	2.47998
2.41233	3.39107	2.41712
2.96373	3.37734	2.31814
2.73294	3.4416	2.54384
2.57787	3.55384	2.95504
3.06836	3.81536	3.30077
2.69379	3.36076	2.91098
3.01946	3.47977	3.24698
2.8967	3.68367	3.22782
2.95451	3.18318	3.12294
2.48035	3.19002	2.68175
3.03782	3.12856	3.68949
2.36726	3.5226	3.26096
2.60262	3.54181	3.06825
2.91345	3.04496	2.21089
3.12053	3.23513	2.19003
2.77346	3.01008	2.82331
2.70343	3.3083	3.61752
2.79391	3.25182	2.90943
2.69767	3.10283	3.18967
2.72986	3.39531	3.07687
2.44216	3.25166	2.82357
3.02237	3.31193	2.44869
3.18861	3.29301	2.30453
2.90108	3.329	3.31273
2.40472	3.51945	2.73849
2.63679	3.29701	2.87636
2.88125	3.3499	2.94359
2.7294	3.23817	2.71511
2.64688	3.42308	2.61373
2.65921	3.22453	3.16931
3.03896	3.3079	4.07652
2.43208	3.32757	2.47744
2.67083	3.32529	2.986
2.88	3.44176	2.86609
3.07879	3.49634	3.73435
2.91963	3.25497	2.43487
2.88999	3.47257	3.55681
2.84358	3.23404	2.8546
3.13481	3.22218	2.20641
3.14313	3.12283	3.84775
2.50811	3.45667	3.47095
3.13383	3.07562	3.0303
2.93267	3.19376	3.53789
2.91553	3.87225	3.13992
2.38822	3.43184	3.09022
2.67005	3.23364	3.03645
3.65109	3.64568	1.86887
2.81567	3.31427	3.17934
2.93792	3.2495	3.50803
2.75962	3.39402	4.18391
2.63887	3.01817	3.19551
2.52412	3.14744	3.85648
2.39485	3.18748	2.3076
2.7379	2.86678	3.2987
2.88574	3.6837	4.04752
2.72278	3.24439	2.7187
2.8264	3.02366	2.94953
2.78336	3.28966	2.84071
2.53642	3.1488	3.3453
2.72614	3.91199	2.65921
3.16024	2.8977	3.70105
2.76984	3.19486	3.4353
3.06664	2.91373	2.58854
2.45022	3.2895	2.60691
3.01271	3.05607	3.30645
3.26338	3.52763	3.94829
2.61834	3.2516	3.53998
2.84639	3.21623	2.40144
2.79641	3.34549	2.35899
3.04968	3.35388	2.6014
2.93365	3.23786	3.89551
2.67515	3.18754	2.93508
3.16368	3.14682	3.63477
2.66836	3.50849	3.26549
3.15226	3.41132	3.62706
3.36928	3.34154	3.31887
2.61306	2.97083	4.12957
2.84471	3.19377	3.08467
2.50541	3.05205	3.35974
3.03261	3.39776	2.91137
2.53457	3.39923	3.22932
2.95347	3.37001	3.36864
2.5556	3.18571	3.47675
2.77323	3.43135	3.29429
2.89647	3.50753	3.31681
3.15953	3.43051	3.06761
2.99423	3.06839	3.86107
2.90955	3.43346	2.22961
3.10485	3.12695	3.23404
2.87002	3.41844	2.29956
2.59612	3.07262	3.64299
2.79514	3.31201	2.46684
2.44312	3.94715	3.42444
2.82281	2.941	3.23069
2.50232	3.22864	3.3014
2.84446	3.42429	2.61001
2.57209	2.97821	2.67162
3.00033	3.15161	2.384
2.63495	3.11669	3.47737
2.72472	2.83734	2.92417
2.66011	3.14741	2.91169
2.80661	3.36988	3.3168
3.18343	3.17175	3.03837
2.82272	3.10657	3.91351
2.54317	3.66283	3.79029
2.82164	3.25728	1.81398
2.65422	3.00348	3.21914
2.67765	3.4979	2.89532
2.97826	3.18155	3.34748
2.66404	2.99475	3.41588
2.47198	3.26058	3.45605
2.73138	3.17375	3.06596
2.62226	3.29711	3.04363
2.56343	3.34963	2.71013
2.4086	3.70238	3.51982
2.85634	3.77697	2.90824
2.70541	3.32043	2.91418
3.0764	3.00349	3.86734
2.92209	3.01807	3.46394
3.06364	3.43082	2.84361
2.73137	3.00845	3.15332
2.92622	3.33648	2.78138
2.91586	3.34243	2.65064
2.86946	3.40848	3.65669
2.48759	3.22137	2.61311
2.57356	3.20714	3.75698
3.07517	2.98427	3.48252
3.07441	3.3999	2.93929
2.69619	3.25165	3.03174
2.87634	3.13117	3.0963
2.92147	2.94287	3.50569
2.52404	3.29451	3.54689
2.69244	3.7921	3.15723
2.77319	3.50097	2.86207
2.94999	3.83455	3.68922
2.76736	3.04315	2.56831
2.77144	3.18213	3.65269
2.75364	3.22776	3.6358
3.00901	3.16792	4.12085
2.52995	3.53063	3.40638
2.28456	3.25048	2.50139
2.76469	3.06148	2.51539
3.09236	2.97608	2.65214
2.82608	3.39064	3.04699
2.14917	3.79254	3.07065
2.59413	3.27985	2.27325
3.27547	3.40558	3.40745
3.01763	3.0121	2.25014
2.93763	3.60637	2.76394
2.28803	3.02942	3.52788
2.77804	3.2333	3.16935
2.42539	3.34705	2.51388
2.94792	3.37293	2.96689
2.8494	3.47228	3.12142
2.27808	3.60744	3.04058
2.90483	3.18322	2.73848
2.58379	2.90856	3.20274
2.72841	3.19722	2.85081
3.31254	3.94056	3.45864
2.82794	3.57142	3.17375
2.51597	2.96237	3.57606
2.87482	2.96386	1.74701
2.72282	3.04784	3.24207
2.73948	3.35321	2.96169
2.6674	3.49185	2.28833
2.86898	3.28911	1.9857
2.51587	3.50399	4.04049
3.15657	3.35016	3.74756
2.97283	3.12767	2.35158
3.20171	3.04978	3.64157
3.14981	3.30758	2.74398
2.66801	3.33416	2.65923
2.8092	3.18622	3.01681
2.69153	3.44599	3.32603
3.46191	3.63894	3.75255
2.5636	3.55979	3.01269
2.83001	3.64057	2.85638
3.20816	3.82654	3.40481
2.35879	3.19564	3.2198
2.57609	2.88821	3.10585
2.92322	3.37212	2.66671
2.6558	3.6451	3.00409
2.67275	3.11682	3.52854
2.53062	3.61727	2.61405
2.86075	3.62484	2.30713
3.28661	3.05123	4.07896
2.66787	3.50557	3.22913
2.98019	3.18304	2.73637
2.60998	3.05982	3.47873
2.28176	3.04215	3.64103
3.03527	3.05187	3.15108
3.06627	3.31029	2.94036
1.74344	3.25686	2.84227
2.70169	3.99795	2.57552
2.67986	3.20269	2.64769
2.7682	3.49767	3.21178
2.80565	3.28323	3.36647
2.52011	3.31452	3.21627
2.49823	3.33516	3.14249
3.2365	3.32739	2.58107
2.80629	3.20217	3.02928
2.9432	3.19413	3.44954
2.31969	3.74762	3.02823
2.70607	3.05749	2.87581
3.06586	3.99883	3.60604
2.93497	3.57233	2.64156
2.62066	3.40236	3.64157
2.74418	3.41316	2.35868
2.20539	2.98227	3.13567
2.82248	3.66694	2.51157
2.79018	3.16703	3.52075
3.19468	3.24751	3.54843
2.75493	3.2334	3.02649
2.71724	3.04817	3.61289
2.58105	3.03588	2.53614
2.46259	3.35399	3.46812
2.73979	3.485	2.82831
2.50078	3.13959	2.07827
2.80047	3.55098	3.63979
2.51031	3.20316	4.04856
2.813	3.15787	3.46167
2.6015	3.06739	2.42794
2.83869	3.23889	2.72934
3.38998	3.22477	3.4389
2.72493	2.6929	3.37149
2.32278	3.28769	3.33296
2.48963	3.53976	2.71026
2.89601	3.34443	2.71878
2.7324	3.60593	3.37022
2.69874	3.8148	2.98897
2.81212	3.45367	3.0935
3.01866	2.97977	2.69544
2.6083	3.30196	3.88796
3.5106	3.26697	3.25817
2.66456	3.31221	3.61828
2.55446	3.0815	3.26042
2.69112	3.19367	3.46846
2.52748	2.78922	3.50056
2.7644	3.20452	2.40272
2.86038	3.21259	3.46901
2.69068	2.95052	2.51901
2.60163	3.32781	3.40405
2.96231	3.40856	2.91608
2.71464	2.76193	3.32518
3.14731	3.57234	2.98591
2.66214	2.86778	2.91303
2.70151	3.04674	2.73479
2.78439	3.53125	3.63045
2.7502	2.98929	3.13053
2.21226	3.49089	2.72212
2.71822	3.40431	2.83088
3.1385	3.43561	3.29078
2.96178	2.90228	3.15152
2.2356	3.46329	3.61759
2.65685	2.91476	2.9966
2.72452	3.57784	3.52837
3.26711	3.61459	3.64741
2.31384	3.26867	3.62686
2.83074	3.12963	3.24489
2.83448	3.65055	2.25287
2.55245	3.08904	3.00839
3.03601	3.30189	2.42289
2.58849	3.37991	3.30034
2.56275	3.52227	2.6029
2.89803	3.38332	2.40134
3.37242	3.13273	3.08117
2.99741	3.19824	3.23318
2.43067	3.51789	2.97073
2.49681	3.69632	3.7498
3.08478	3.02499	3.35177
2.70169	3.25187	3.09597
2.39706	3.07767	2.75586
2.24299	3.30438	3.31403
2.74223	3.44366	2.83893
2.695	3.213	3.64102
2.59711	3.44728	3.68895
2.74431	3.35037	3.619
2.88603	3.49204	3.15154
2.81622	3.26387	3.42911
2.94051	3.36782	2.62388
2.73146	3.44707	3.96885
3.04927	3.37998	3.0763
2.92951	3.13229	2.9171
2.89792	3.7958	3.3386
2.82038	3.31183	3.7699
2.64808	2.90048	2.49695
2.72665	3.23926	2.40286
2.63149	3.47079	2.59147
2.68461	3.41622	3.11628
2.58759	3.98225	3.45518
2.73734	3.25976	3.4899
3.13837	2.9362	3.85062
2.40572	3.30674	2.82501
2.87788	3.35397	3.52179
2.73891	3.62516	2.40275
3.03606	2.98691	2.17445
2.45029	3.09859	2.15694
3.11805	3.16933	4.29651
2.65877	3.86045	2.89218
2.22609	3.44934	2.1941
2.87264	3.35806	2.27848
2.88511	3.21202	2.73721
1.81437	3.55528	2.56836
2.55304	3.36202	2.98909
2.58574	3.28127	3.45198
2.61004	3.465	3.74737
2.97554	3.43813	3.03824
2.75846	3.2048	3.2522
2.65749	3.17247	3.39888
2.82379	3.43348	2.9687
2.65006	3.14722	2.84565
3.08822	3.14308	3.47971
2.36984	3.17242	3.46573
2.70638	3.48665	3.23018
2.68939	3.24268	3.44419
2.6949	3.13142	3.47812
2.50041	3.15769	3.36568
2.53688	3.2517	3.05352
2.90086	3.45535	2.9713
2.80525	3.178	3.2794
2.91853	3.1053	3.29534
3.0289	3.17347	3.3377
2.41716	3.27941	3.14725
2.80935	3.43157	2.84734
2.68946	3.38919	3.0119
2.82323	2.74506	2.56981
3.00917	3.31846	3.40889
2.70435	3.23981	3.02947
2.94084	3.12593	3.0673
2.31773	3.33002	3.16704
2.82788	3.08557	3.36821
2.72746	3.06107	3.01638
2.34352	3.34096	3.56339
2.89934	3.04059	3.20603
2.87073	3.17255	2.83949
1.76362	3.00727	3.69575
2.26032	3.32673	2.43277
2.74121	3.61483	3.10152
3.22966	3.10383	2.98359
2.86525	3.33129	3.88548
2.88997	2.91343	2.10558
3.27713	3.29204	3.73905
2.64789	3.39341	3.5982
3.34748	3.33277	4.40934
2.45203	3.17601	3.35749
2.56196	3.21048	2.60027
2.89139	3.31654	4.02147
2.39245	3.16003	2.94272
2.63324	3.36718	3.93124
2.2799	3.4561	2.68234
2.139	3.16192	2.99951
2.71549	3.32927	4.03675
2.62705	3.64531	2.97811
2.88135	3.17555	3.43092
3.11676	3.37191	3.77506
2.06518	3.2114	3.40846
2.39453	3.4218	3.60288
2.51089	3.49551	3.62282
2.83004	3.51049	3.44065
2.29117	3.2133	3.99815
2.72037	3.15243	3.25409
3.0741	3.14607	2.30942
2.78779	3.25224	2.88099
2.6881	2.93944	3.66701
2.68323	3.28597	2.20054
2.78242	3.74615	2.73457
2.57632	3.57069	3.39282
3.24589	3.16338	3.36106
2.58248	3.28487	3.26229
2.6934	3.34249	2.75375
2.47528	3.46911	3.94181
2.79761	3.33106	2.83494
2.80691	2.95724	3.74799
2.65684	3.04669	2.54712
2.07742	3.49687	2.99722
2.28416	3.16119	3.08081
3.16662	3.01893	2.94855
2.61781	3.68018	4.13226
2.77863	3.09912	3.05176
2.64814	3.1778	3.12689
3.02126	3.14484	2.2212
2.9977	3.59457	3.64927
2.81994	3.59892	2.0776
2.99045	3.18091	3.5717
2.42838	3.12947	2.80415
3.12012	3.33747	3.81689
2.57852	3.63906	3.61062
2.69427	3.10425	2.85957
2.43264	3.32939	3.20258
2.66049	3.20351	3.37664
2.93533	3.35086	3.96527
2.33678	2.95545	2.56438
2.8123	3.39848	2.94762
2.7563	3.41859	3.0761
2.75076	3.24873	2.6769
3.2816	3.12301	3.55274
2.78267	3.28657	3.12213
2.90321	3.10607	2.72962
2.83115	3.45332	2.58769
2.78786	3.2124	3.2506
3.1627	3.28761	2.4327
2.55859	2.92086	3.59745
2.87713	3.65067	3.49081
2.5235	3.25351	3.31374
2.38049	2.96342	2.7317
2.71119	2.98494	3.49423
2.61734	3.46295	3.37397
2.29757	3.29138	3.52105
2.66525	3.16193	3.26528
2.8781	3.44683	3.29355
2.77471	2.95193	2.78373
2.45861	3.59864	3.25998
2.50836	2.83692	2.95353
2.36097	3.20537	3.21946
2.5509	3.74897	2.36522
2.65324	3.08187	3.48116
2.66376	3.23067	2.06318
2.46642	3.27195	2.74575
2.80646	3.68808	3.99366
3.01336	2.97467	2.72531
2.33603	3.57517	2.26039
2.8443	3.40094	2.81068
2.99192	3.21258	3.21474
2.45881	3.34639	2.49174
2.79085	3.21891	3.31789
3.31962	3.34204	3.22429
2.7945	3.27608	2.76866
2.88485	3.40535	3.73678
2.95831	3.22562	3.58277
2.40957	3.02111	4.28763
2.86075	3.29676	3.23126
2.8685	3.44704	3.72299
3.28794	3.1194	3.42074
2.55947	3.03001	3.14067
2.86534	3.30972	3.01075
2.48218	3.24162	2.89632
2.73249	3.39558	3.71443
2.66312	3.58642	3.45043
3.09394	3.24068	3.18475
3.48446	3.03176	2.65732
3.06264	3.32963	2.88333
3.47234	3.40949	3.27981
3.13401	3.54497	3.686
2.25367	3.30497	2.56156
3.04308	3.20239	3.52297
2.70149	3.26716	3.60027
2.03271	3.09171	3.69843
2.69943	3.65828	3.43539
2.95533	3.16279	2.60104
3.04586	3.05005	2.76964
2.81984	3.55468	3.59602
2.65071	3.1501	3.12367
3.15503	3.18695	3.81986
2.72932	3.20407	3.36125
2.12109	3.04511	3.05312
2.18522	3.18301	2.98331
2.41268	3.26976	3.40518
2.13675	3.28404	3.21529
3.02681	3.19277	2.32469
2.77456	3.2988	3.18521
2.74952	3.24939	2.67813
2.75408	3.02702	2.5211
2.0865	3.37783	3.64051
3.24151	3.31233	3.03942
3.08248	3.2193	3.10223
2.54764	3.49885	3.88024
2.3826	3.29497	2.32709
3.22636	3.28828	2.91349
3.03552	3.24113	3.30549
3.34286	3.10684	3.25724
2.29623	2.87893	3.22898
2.51589	3.98245	2.70779
2.40776	3.69717	2.71397
2.54527	3.56302	2.50498
2.81062	3.23029	2.71976
2.86311	3.36054	3.52855
2.99332	3.19974	3.27309
2.75352	3.16737	3.74418
2.35342	2.78271	3.73656
1.82668	3.3249	3.50054
2.58406	3.3137	2.62326
2.81462	3.60643	3.47913
2.73209	3.13404	3.99754
2.94217	3.10342	2.24493
2.58857	3.12892	3.34964
2.45169	3.02864	2.90783
2.8835	3.21057	2.37814
3.04791	3.36475	3.11598
3.03657	3.52987	2.85524
[truncated: 16,039 more rows]

## Sheet: Fig.1k
Fig. 1k. PLA signal per cell.
Image	PLA dot number	Cell number	PLA dots/cell
SIRPa_0 ug/ml_01	26	11	2.36364
SIRPa_0 ug/ml_02	9	16	0.5625
SIRPa_0 ug/ml_03	32	23	1.3913
SIRPa_0 ug/ml_04	3	8	0.375
SIRPa_0 ug/ml_05	3	9	0.333333
SIRPa_0 ug/ml_06	5	12	0.416667
SIRPa_0 ug/ml_07	33	9	3.66667
SIRPa_20 ug/ml_01	133	9	14.7778
SIRPa_20 ug/ml_02	100	8	12.5
SIRPa_20 ug/ml_03	225	8	28.125
SIRPa_20 ug/ml_04	392	13	30.1538
SIRPa_20 ug/ml_05	306	17	18
SIRPa_20 ug/ml_06	252	17	14.8235
SIRPa_20 ug/ml_07	313	20	15.65
		180

## Sheet: Fig.1l
Fig. 1l. Relative protein expressoin analyzed by WES.
	BCL-2/b-Actin	Normalize to ctrl			LaminAC/b-Actin	Normalize to ctrl
C4-2 ctrl	0.00747355	1		C4-2 ctrl	0.0373214	1
C4-2 TNFa	0.00291172	0.389603		C4-2 TNFa	0.028922	0.774943
C4-2 TNFa+SIRPa	0.00346411	0.463516		C4-2 TNFa+SIRPa	0.0335861	0.899916
C4-2 ctrl	0.0254169	1		C4-2 ctrl	0.0251023	1
C4-2 TNFa	0.010483	0.412443		C4-2 TNFa	0.0213955	0.852333
C4-2 TNFa+SIRPa	0.0124216	0.488714		C4-2 TNFa+SIRPa	0.022385	0.891754
C4-2 ctrl	0.196221	1		C4-2 ctrl	0.141522	1
C4-2 TNFa	0.0729307	0.371676		C4-2 TNFa	0.108219	0.76468
C4-2 TNFa+SIRPa	0.0863963	0.440301		C4-2 TNFa+SIRPa	0.132375	0.935366

## Sheet: Fig.1m
Fig. 1m. PB_AnnexinV expression (log10) of C4--2 cells.
Ctrl	TNFa	TNFa+SIRPa
2.87311	3.45825	3.04064
2.88999	3.30451	2.94073
3.41072	3.57291	3.31217
3.44387	3.06803	2.99821
3.28729	3.16404	3.18258
3.17318	3.57501	3.19271
3.98543	3.23778	3.54049
3.98488	3.29149	3.26344
2.93867	3.49643	2.88569
3.01466	3.31546	3.42603
3.44127	3.45658	3.18108
3.01124	3.21418	2.97646
2.96682	3.19167	3.39422
3.54715	3.43305	3.22495
3.85468	3.45221	3.15132
3.20754	3.31937	3.16924
3.46662	3.50356	3.10948
3.95008	3.11936	3.44501
3.27163	3.10094	2.99567
3.27164	3.2422	3.40242
2.90195	3.4653	3.36592
4.16405	3.47741	3.28415
2.86584	3.58419	2.88153
3.69946	3.21774	3.18288
3.30003	3.41564	3.31266
3.06644	3.40624	3.08942
3.01392	3.26825	3.34523
2.98496	2.98904	3.26624
2.86869	3.36982	3.18185
3.6435	3.06579	2.96111
3.00127	3.20468	3.51529
3.16184	3.24997	3.23189
3.0905	3.42373	3.44913
3.2304	3.28031	2.90588
4.0027	3.37209	3.09267
3.1086	3.35372	3.22285
3.93234	3.52235	2.87271
3.20564	3.65983	3.18756
2.84992	3.09256	3.06273
2.87934	3.36117	3.16081
2.84373	3.42851	3.17737
2.85536	4.47088	3.02638
3.17608	3.03792	3.2817
3.4122	3.18656	2.87934
2.88084	3.39728	2.89943
4.05122	3.60515	3.18321
3.09688	3.38565	3.02382
3.82197	3.00789	3.32101
3.5575	3.2019	3.12311
3.4275	3.36664	3.61763
3.12007	3.15443	3.2535
3.20719	3.19872	3.29178
3.00632	3.31636	3.46453
2.86412	3.519	3.00106
3.84338	3.58852	3.18779
3.97554	3.35502	3.04144
2.98737	3.298	3.46716
3.13302	3.50464	3.46205
2.89074	3.55491	3.16146
3.71048	3.13749	3.08256
3.51743	3.61064	3.40771
3.26696	3.26866	3.32845
2.95649	3.4847	3.49759
3.32298	3.15832	3.1297
3.22178	3.5001	2.98342
3.17371	3.5438	2.9608
2.90743	3.21208	3.2576
3.23227	3.25984	3.01489
2.90415	3.45353	2.94037
3.90109	3.42792	3.16008
3.59578	3.18271	3.18055
3.6073	3.38345	3.1748
3.11672	3.0962	3.09973
3.5177	2.87598	2.90467
3.21079	3.02143	2.84724
3.67831	2.95283	3.29792
3.0854	3.42612	3.10182
3.20934	3.5731	3.46777
2.92756	3.57617	3.0213
4.17876	3.43792	3.36948
3.03542	3.06148	3.4316
3.35499	3.01852	3.15419
3.59744	2.99322	3.1494
3.43119	3.0537	2.99715
3.20931	3.43115	2.8802
2.91146	3.17447	3.32184
3.09843	3.08785	2.86613
2.84783	3.31741	3.15451
3.36219	3.30762	3.38884
3.0041	3.33109	3.16861
3.14476	3.3343	3.14986
3.09386	3.32861	3.3533
3.9569	3.61433	3.06052
2.88416	3.3543	3.4352
4.07222	3.53597	2.93117
3.74297	3.63525	2.88736
3.0116	3.44573	2.8733
4.12428	3.49148	3.19877
3.3424	3.2894	3.07083
3.20535	3.32008	3.38299
3.18771	3.32829	3.30801
3.32	3.29698	3.13834
3.43015	3.35149	3.08994
3.45857	3.00582	2.98413
3.10868	3.027	2.85544
4.15072	3.4119	2.90893
2.99718	3.22525	2.93224
3.26289	3.20498	3.27042
3.71583	3.23843	3.30972
2.99245	3.26324	3.03234
3.92649	3.30124	3.14231
3.58643	3.13529	3.22493
2.91654	3.65156	3.22922
4.19173	2.88991	2.96264
2.87914	3.20107	3.18844
3.07981	3.29523	3.17542
2.89521	3.09593	2.93195
3.34097	3.22587	3.43576
3.01071	3.37092	3.17157
3.58224	3.45361	3.63526
2.97993	3.4601	3.1468
2.91304	3.15092	3.14023
2.89259	3.08732	3.36319
2.97487	3.40499	3.05695
2.88218	3.48557	2.89594
2.91042	3.29508	3.25
3.07355	2.84957	3.36764
4.03199	3.26274	3.2773
3.14662	3.52743	2.90417
2.97066	3.24327	3.38604
2.93236	3.60134	3.14606
2.87637	3.24164	3.03667
3.36631	3.44098	3.25303
4.14279	3.36448	3.15486
3.18484	3.39499	3.3381
3.34242	3.23508	3.26516
4.05773	3.40972	3.28727
2.90361	3.21505	3.1842
3.42022	3.23561	3.0327
2.99081	3.37035	3.43853
3.87779	3.46708	3.14028
2.93376	3.26517	3.38935
3.13329	3.33899	2.90256
2.91807	3.37392	3.16984
3.17357	3.32894	3.0872
3.15511	3.13205	3.01107
2.87875	3.5374	2.88798
3.08215	3.35976	2.89813
3.66528	3.27374	2.88645
3.00184	3.40831	3.19707
4.09197	3.30686	3.11911
2.85171	3.30625	2.86939
3.86429	3.39031	3.02834
3.3064	3.40398	3.33226
4.14766	3.2345	3.67467
3.28529	3.63916	2.96079
3.46595	3.31882	3.30871
3.12599	3.32843	3.15122
4.00969	3.40073	3.46955
2.9054	3.29084	3.03798
2.86797	3.1311	2.87432
3.10753	3.44396	3.00099
3.32072	3.43071	2.90783
2.91767	3.27335	2.89761
3.25529	3.51786	3.29838
3.33108	3.08388	2.89534
3.3324	2.89268	3.35585
2.89664	3.49761	3.12271
3.08539	3.74697	3.03927
3.19261	2.9013	3.17788
2.88552	2.88541	3.44499
3.60206	3.35842	3.22985
2.86784	2.88524	3.00053
3.32326	3.31171	3.04074
3.40767	3.35181	3.18543
3.26601	3.25995	3.33909
3.71229	3.29418	3.3726
3.12386	3.44753	3.1653
2.92051	3.51871	3.00865
3.63045	3.3166	3.40235
3.23228	3.55155	3.22305
2.88691	3.31026	2.96529
2.87294	2.9511	2.99591
3.1493	3.50703	2.94655
3.9737	3.48848	3.01957
3.15605	3.16584	2.93364
3.02532	2.93598	3.29091
3.37653	3.43702	3.15878
3.14488	3.45775	3.13117
4.23902	3.34711	3.08201
2.99778	3.2019	3.043
3.08382	3.11228	3.52557
3.39123	3.58405	3.06157
3.00411	3.60582	3.4383
3.55007	3.29632	3.14462
3.56503	3.40525	3.11332
3.44692	3.38634	3.0055
2.99463	3.37702	2.86551
3.30183	2.93874	2.98616
3.32016	3.46601	2.95471
3.58375	3.00601	3.30177
2.94516	3.31092	3.08695
2.93151	3.18356	2.91554
3.26085	3.34699	2.90681
3.95378	3.33832	2.87389
3.33626	3.29513	3.0113
2.93682	3.29559	3.19571
3.19115	3.36242	3.39389
3.332	3.37262	3.12502
2.98915	2.98508	2.94422
2.85381	2.96491	2.87857
4.25905	3.41944	2.88505
3.00668	3.07618	3.18101
3.92266	3.1059	3.50635
3.68354	2.84153	3.05076
3.3015	3.38808	3.41721
3.04117	3.24184	3.27036
2.92677	2.97601	3.32462
4.06344	3.34472	3.18863
2.85247	3.31768	3.27097
3.12782	3.4174	2.97117
3.36699	3.32132	3.08012
3.54365	3.35405	3.12038
2.87189	3.51513	3.28409
3.25037	3.52252	3.34852
3.49707	3.54536	3.25304
3.49613	3.13783	3.28557
2.9704	3.37524	3.19065
2.99665	3.46682	3.25832
3.1251	3.28254	3.39443
4.09187	3.51944	3.15719
2.95073	3.06296	3.19185
3.50724	3.1471	2.91554
2.84906	3.57794	3.26601
4.06058	3.47655	3.05575
2.99382	3.30294	3.46345
3.00593	3.3789	3.19574
3.49898	3.12709	2.87102
3.2581	3.36231	2.99101
2.93177	3.12818	3.38554
3.41309	3.0874	3.14229
3.21776	3.58349	3.20703
3.85323	3.39989	2.86477
3.96518	3.40982	2.91106
3.11271	3.47453	3.35016
2.95544	3.48451	2.91117
4.03908	3.39028	3.04049
3.14925	3.38923	3.34694
3.36071	3.42521	3.05186
2.97217	3.53696	3.0694
3.81055	3.19755	3.04557
2.86001	3.04694	3.35999
3.62206	3.29162	3.06203
3.1113	3.21565	2.84191
3.35958	3.2247	2.87789
2.8628	3.48186	3.00157
3.4723	2.9779	2.85556
2.8876	3.28879	3.0957
2.88152	3.28727	3.0189
2.88933	3.18766	3.01253
2.84908	3.17632	3.12354
3.15347	3.32555	3.07511
3.57754	3.45928	3.48238
3.23765	3.51669	3.24368
3.36098	3.33801	3.02205
3.21336	3.13757	3.25983
2.90505	3.09813	2.88613
4.05319	3.32421	2.87677
3.58763	3.20689	3.62396
2.95436	3.34261	2.93883
3.0327	3.07164	2.91999
3.77699	3.39271	3.31615
3.34044	3.55977	3.08398
3.09672	3.04395	3.04949
3.24643	3.33936	3.57208
2.93381	3.40493	2.98855
3.36232	3.54602	2.84975
3.192	3.085	2.97166
2.91985	3.27111	2.94333
2.89274	3.03198	3.30219
3.41	3.25712	3.11565
4.06966	3.12954	3.24588
3.27616	3.28122	3.30214
2.96025	3.32078	3.14983
4.02926	3.4555	3.04193
3.04848	3.50626	3.00797
3.45218	3.35644	3.17791
2.89378	3.66884	3.24403
3.51351	3.38668	3.06931
3.2589	3.47142	3.06447
3.62446	3.33523	3.07624
2.88394	3.53578	3.17397
3.93873	3.47235	2.97685
3.3058	3.32061	2.90674
2.88202	3.09231	3.24157
3.68697	3.2577	3.20262
2.93537	3.42913	3.04175
3.04721	3.71453	2.85218
4.0924	3.25714	3.02615
3.36978	3.4053	3.51299
3.06668	3.36734	3.36329
3.24986	3.43172	3.19358
3.29634	3.20725	3.41902
3.49436	3.18052	2.84636
3.346	3.26081	2.86941
3.18604	3.53902	3.0447
2.86493	3.1777	2.99406
3.4384	3.51662	3.0713
3.52189	3.29521	2.98514
3.31689	3.17332	3.49085
3.18783	3.43048	3.47166
3.42785	2.90411	2.94311
3.00166	3.29628	3.05141
3.30213	3.10723	3.1338
3.74668	3.46262	2.89989
2.93707	3.26954	2.99327
2.97774	3.30817	3.04898
3.91501	3.65115	3.08959
3.34103	3.58081	3.14102
4.10437	3.4442	3.20514
2.91824	3.47788	2.91794
3.41872	3.56237	3.10662
2.95374	3.46869	3.36753
4.22351	3.43891	2.97556
3.00776	3.52584	3.01714
3.22166	3.46862	3.4011
3.75685	3.38114	3.15081
3.08903	3.30108	3.08232
3.83742	3.34059	2.97989
3.01466	3.45324	3.1621
2.92233	3.59065	3.21782
2.85454	3.50318	3.04563
2.86721	3.31061	3.07422
2.9778	3.33197	2.90872
3.70585	3.44136	2.94248
3.6333	2.97125	3.27406
3.33164	2.93414	3.12662
3.51829	3.23744	3.0079
3.30338	3.23188	3.31713
3.09356	3.60327	3.32354
2.96159	3.32957	2.91406
3.01666	3.30052	3.10183
2.87612	3.2817	3.23606
3.23747	3.04436	2.93024
3.91812	3.36494	3.09109
3.08209	3.37346	2.86785
2.93789	3.17407	3.20781
3.38205	3.50411	3.09712
3.67268	3.44929	3.29372
3.88086	3.2465	2.92124
3.41017	3.54845	3.27446
3.29556	3.40412	3.15739
3.47532	3.23255	3.52152
3.91555	3.26712	3.39661
2.8964	3.36799	3.32327
2.86122	3.56788	3.16001
2.97911	3.47812	2.98517
2.86847	3.15035	3.03941
3.13008	3.55252	2.99462
3.18072	3.43436	3.05483
4.20596	3.3522	3.51608
3.41742	3.17313	2.85203
3.39428	2.93766	3.29122
3.55713	3.36088	2.9885
3.78662	3.34115	3.26905
3.82921	3.07982	2.98734
3.27616	3.34046	3.23906
2.97634	3.35907	3.32119
2.8979	3.45697	3.20912
3.47283	3.40013	3.14006
3.01696	3.47352	2.89682
3.49237	3.45121	3.31114
2.85232	3.59696	3.07684
3.21074	2.94504	3.3157
3.28191	3.38523	3.04288
2.86151	3.4461	2.95379
3.43496	3.13409	2.91266
3.39652	3.41779	2.8612
3.88685	3.38132	3.03248
3.13662	2.99989	3.18614
4.04927	3.21213	3.25963
3.84703	3.27523	2.86387
3.04061	3.11192	3.15515
2.91332	3.56229	2.9195
3.32473	3.55033	2.93223
3.29263	3.10481	3.2865
2.8916	3.35521	3.28723
3.75709	3.0094	3.23804
2.96531	3.36343	3.31473
3.19947	3.35212	3.14442
3.29727	3.43169	3.49673
2.85269	3.54395	3.18835
3.25066	3.39604	2.86127
3.4593	3.38871	3.56665
3.58067	3.2877	3.26863
3.0112	3.46975	2.9993
2.94319	2.95154	3.32967
3.69907	3.60251	3.20955
3.16707	3.58903	2.88174
3.0929	3.53332	3.25294
3.01865	3.47712	3.47949
3.09548	3.49445	2.90798
3.2206	3.35617	2.91799
3.32199	3.35118	2.97559
2.97994	3.03424	3.33382
3.25311	3.6266	3.10792
2.91325	3.22389	3.08813
3.51101	3.4087	3.26891
3.30624	3.37285	3.30857
3.25856	3.21768	3.14206
2.92342	3.47218	3.08526
3.09381	3.4459	3.32372
3.74679	3.16367	3.15738
3.93845	3.07051	3.20549
3.17726	3.40608	3.15876
3.24109	3.43222	2.90226
2.92097	3.35775	3.25883
3.25873	3.46264	3.04951
2.86889	3.37865	3.15249
3.08941	3.47554	3.21189
3.18289	3.64325	3.15257
3.61827	3.36268	3.09949
2.84179	3.46965	3.13248
3.21598	3.63493	3.22245
3.08503	3.08602	3.03823
3.83408	3.64402	3.39155
3.6963	3.29642	3.12462
3.01549	3.36441	2.97044
3.9798	3.13575	3.0782
2.8484	2.90358	3.52549
3.34149	3.12553	3.08012
3.12482	3.40629	3.33248
3.13712	3.33593	2.93845
2.88621	3.32612	3.36152
3.41171	3.30465	3.41039
2.89217	3.20083	3.27365
3.03545	3.10322	3.52418
3.54548	3.38353	3.17369
3.22305	3.41814	3.02301
2.9281	2.98811	3.50308
3.26564	3.33394	3.27084
4.3033	3.23483	3.15007
3.96325	3.31128	3.03842
2.88237	3.2343	3.38011
3.62619	3.34938	3.15733
3.27846	3.41105	3.30913
3.30254	3.22657	3.1084
3.53335	3.27059	3.09363
3.99657	3.40984	3.3798
2.95747	3.42681	3.56542
3.41511	3.49889	3.45355
3.55241	3.25578	3.05825
2.87775	2.99881	3.15934
2.9032	3.50244	2.87849
2.97513	3.40941	3.58118
3.596	3.37898	3.14066
2.96806	3.10802	3.31955
4.18748	3.47515	3.2833
3.64875	2.98584	2.97684
3.0939	3.66007	2.89803
3.35864	3.45282	2.92906
3.52042	3.49334	3.30859
3.08835	3.33084	3.12474
3.20673	3.49491	2.87001
3.51262	3.45582	3.23551
2.95755	3.56406	3.05981
3.00683	3.39759	2.96341
2.88368	3.22996	3.1585
3.02601	3.30022	3.10233
3.23415	3.46669	3.19613
2.98879	3.16542	3.18756
3.26199	3.39156	3.15758
3.44725	3.31208	3.07296
4.21063	3.32006	2.98468
2.98087	3.17129	3.3474
2.99832	3.54221	2.87297
3.0371	3.26687	2.99205
3.36562	3.36371	3.32014
3.28328	3.48416	3.1176
4.06664	3.53728	3.17126
3.11926	3.52328	3.03494
3.00158	3.35001	3.21149
3.89342	3.49097	3.36517
3.03636	3.05037	2.85139
2.98409	3.09727	3.09901
3.36211	3.37889	3.12391
3.59872	3.24384	3.05871
3.16122	3.39261	2.91692
3.25896	3.3663	3.2157
3.34578	3.49124	3.1126
3.26663	3.40628	3.22234
3.83365	3.49155	2.99093
4.13957	3.52713	3.35388
3.80194	3.47769	3.16308
2.9006	3.62007	3.03919
3.01	3.50343	3.56861
3.49847	3.55894	2.9669
3.71817	3.41132	3.28164
3.17302	3.32672	3.22468
2.97608	3.41797	2.99435
3.80641	3.27677	3.14354
2.95164	2.91064	3.22507
3.26009	3.5294	3.22359
4.14082	3.188	3.18916
2.8474	2.97333	3.25219
3.06722	3.30902	3.39547
3.12852	2.97306	2.93793
3.1666	3.46526	3.38445
2.99199	3.40151	3.34178
3.05108	3.55424	3.21005
3.87115	3.58136	3.33516
3.10814	3.5891	2.86003
3.95985	3.43091	2.86078
3.89718	2.85712	3.14939
3.03282	3.18859	3.12159
3.30637	3.24766	2.96768
3.01335	3.61709	2.92381
2.93771	3.29456	3.27316
3.01475	3.36483	2.98183
2.94894	3.3726	3.28263
3.15233	3.30609	3.27759
3.26251	3.36519	2.96579
2.95038	3.47378	2.9897
3.38534	3.40952	3.19958
3.33895	2.96381	2.89438
2.97601	3.26289	2.93038
3.90755	2.98242	3.46733
3.02301	3.44285	3.09497
3.24528	3.40713	3.09641
4.08262	3.07413	2.95205
3.74543	3.31791	3.2339
3.61008	3.16529	2.89099
4.03203	3.13294	3.33278
3.40821	3.62894	3.05434
2.90444	3.52367	3.11281
2.8777	3.55438	3.13138
3.05926	3.66004	3.31295
4.11781	3.62633	3.04653
3.32797	3.30659	3.3135
2.86063	2.93293	3.05375
2.92719	3.24928	2.97128
3.47315	3.00869	3.05658
3.49492	3.46564	3.25007
3.1916	3.40103	3.09687
4.1611	3.43891	3.0574
4.22377	3.28459	3.06408
3.64903	3.00235	3.31927
2.96454	2.96979	3.00085
3.80799	3.27017	3.40286
3.13364	3.37473	3.25064
2.86261	3.44005	3.17311
3.02672	3.30582	2.97697
3.52936	3.24348	3.2787
3.01703	3.68533	2.9908
3.46478	3.50649	3.08929
2.96257	3.12571	2.99919
4.00595	3.45609	2.98458
2.95069	3.43184	2.88205
3.09443	3.05524	2.86682
3.42616	3.35287	2.9664
2.85824	3.46403	3.01738
3.6343	3.5277	2.95293
3.36365	3.48957	2.94871
3.98125	3.57421	3.14335
3.05296	3.24745	3.57803
3.37578	3.50276	3.12608
3.16353	3.44812	3.30228
2.98804	3.18528	3.18952
2.90344	3.30765	3.17404
3.04169	3.43937	3.37275
3.34845	3.26383	3.21054
3.8654	3.64513	3.44193
2.86102	3.44653	3.40268
2.92456	3.28643	3.38575
3.57137	3.47783	3.11261
3.51161	3.36624	3.32249
3.30637	3.34521	3.19919
2.98517	3.35985	3.12994
3.22316	3.49983	2.86657
2.88774	3.01399	3.60082
2.86724	3.42354	3.32359
2.96047	2.91665	3.46672
3.21331	3.12841	3.03652
4.00082	3.30709	3.31554
3.87563	3.4679	3.39819
4.17857	3.31218	3.04949
3.11146	3.29278	3.28104
3.6543	3.71635	3.4383
2.9362	3.36678	2.90161
3.33389	3.53167	2.96732
2.89802	3.35393	3.11648
3.45599	3.40302	2.94577
3.16922	3.43035	2.90029
2.88961	3.2036	3.24394
2.96309	3.55164	3.48459
3.62139	3.37976	3.13841
3.37633	2.89637	3.09947
4.10686	3.00696	3.08479
3.04701	3.38877	3.03203
3.24828	3.59418	3.23339
3.37866	3.45599	3.1889
3.03505	3.2615	2.88995
3.32494	3.22129	3.51779
2.90622	3.18619	3.02977
3.86587	3.44374	3.26292
3.86705	3.24752	2.99736
3.08333	3.34271	2.88469
3.08922	3.50076	3.14513
3.21481	3.27992	3.32709
2.89315	3.52082	3.17289
3.15267	3.23634	3.32881
3.89631	3.19303	3.64332
2.87571	2.8483	3.09456
3.03808	3.185	3.31305
3.86358	3.64615	3.0126
3.32066	3.48814	3.05877
3.24484	3.39959	3.29431
3.68352	3.51952	3.05752
4.06141	3.29093	2.87825
3.57969	3.53284	2.92213
3.37689	3.17202	3.10891
3.94332	3.31941	3.48908
2.90734	3.1244	3.30483
4.15391	3.1178	2.8983
3.88727	2.94161	3.25734
3.05534	3.47689	3.38313
3.16822	3.2465	3.17109
2.88055	3.32522	3.13439
3.26053	3.21658	3.32568
3.0076	3.09722	3.20232
3.30267	3.31329	3.42787
3.6543	3.36002	3.46056
4.01811	3.36432	3.01224
3.16192	3.29579	3.14938
3.14121	3.39024	2.90098
3.25005	3.18345	3.26748
2.9063	3.52066	3.14666
2.9178	3.31335	3.03766
3.92131	3.48686	3.1029
3.65343	3.68472	3.15181
3.22938	3.26087	3.23864
3.10431	2.96945	3.4676
3.11756	3.10598	3.12281
3.23802	3.04221	3.16743
3.00132	3.37326	3.15506
2.95067	3.13158	3.32186
2.86313	3.21307	3.21081
2.92646	3.45169	3.14594
3.85771	3.02279	3.08306
3.92888	3.19865	3.14793
3.03391	3.48852	3.06403
2.93669	3.57218	3.1085
2.98223	3.41812	3.3912
2.8904	3.25358	3.25168
3.30033	3.30187	2.8832
3.47899	3.50964	3.2772
4.10612	3.51084	3.14518
2.94206	3.38935	3.22231
2.97039	3.50081	3.28939
4.16684	3.26188	3.23942
3.45294	3.36317	3.00448
2.89238	3.27102	3.27339
3.19287	3.20238	3.10309
2.87862	3.55632	3.35401
3.51361	3.06227	3.08741
3.02856	3.42248	3.15733
3.05224	3.24671	3.47728
3.54446	3.11844	3.34333
3.24404	3.35949	2.99978
3.67092	3.3652	2.85189
3.18252	3.54986	3.26858
2.84808	3.42232	3.03053
3.45143	3.20542	3.00218
3.3328	3.09385	3.22147
3.47789	3.41463	3.26238
2.92758	3.46928	3.4433
2.87836	3.09559	3.09176
2.94478	3.23276	3.27515
3.97625	3.10057	3.336
2.862	3.56258	3.44196
2.95246	3.4644	3.27138
3.19468	3.32908	3.63507
3.154	3.46983	3.30048
3.36579	2.92564	3.47107
4.01706	3.50829	3.55861
3.43398	3.18535	3.32296
3.45901	3.23898	3.16817
3.88738	3.47405	2.92534
2.89435	3.41765	3.4778
2.88344	3.20189	3.22282
3.12464	3.27588	2.8631
3.38844	3.32027	3.34046
2.90969	3.57113	3.29487
3.20972	3.65795	3.44306
3.61096	3.28531	2.9398
3.12146	3.19965	3.25509
2.87338	3.29327	2.92372
3.01623	3.18811	3.4731
2.91184	3.2336	3.21635
2.94779	3.44095	2.92365
2.91964	3.36164	3.05058
3.83834	3.37013	3.51926
3.2949	2.90251	3.10155
2.89017	3.45662	3.30373
2.95132	3.40735	3.16359
2.9381	3.43053	3.27918
3.69512	3.28901	3.24418
3.32639	3.5076	2.91126
3.16046	3.21778	3.36568
2.86413	3.51139	2.94345
3.73419	3.32238	3.09311
2.87709	3.39764	2.99871
4.03063	3.18351	3.16927
3.36187	3.29573	3.26551
3.13518	3.86055	3.49029
3.20687	3.24876	3.4358
3.25442	3.07658	3.24146
3.49967	3.09633	3.0878
3.12423	3.43899	3.57859
4.09225	3.51434	3.20725
2.94916	3.41475	2.92745
4.24556	3.52289	2.8779
3.18034	3.22367	3.15654
3.47249	3.30432	3.34322
3.49196	3.44139	3.16855
3.3594	3.47536	3.37894
3.40439	3.06227	3.22446
3.56073	3.12152	3.37875
3.7062	3.46207	3.26991
3.35272	3.35698	3.02495
3.43925	3.01716	3.16385
4.00404	3.22158	3.18238
3.00578	3.35831	3.36214
3.21553	3.36361	3.21452
2.85967	2.99595	3.2246
3.2125	3.54415	3.18244
2.93358	3.14316	3.32066
3.16924	3.36038	2.92
3.06174	3.70263	3.76243
3.7719	3.45349	3.4575
3.06633	3.33504	3.26122
2.87707	3.23205	3.2215
2.99415	3.25383	3.44688
2.8766	3.29806	3.34747
3.57905	3.42263	3.31528
3.87072	3.06003	3.14503
3.42398	3.1608	3.01518
3.69441	2.95048	3.17511
3.17646	3.26439	3.43592
3.04977	3.46377	2.94522
3.49463	3.37409	2.92269
4.15419	3.26955	3.27463
3.26625	3.04713	3.19253
2.99326	3.47407	3.01206
3.09558	3.42796	3.28222
3.8531	3.27249	3.33165
3.05241	3.72251	3.20558
3.17411	3.28964	3.42157
3.61425	3.54546	3.40344
2.8821	3.62291	3.27775
4.15154	3.64983	3.12336
3.10928	3.4852	2.87419
3.48832	3.10796	3.182
3.69328	3.20635	3.38616
4.09542	3.54114	3.23595
3.57891	3.27253	3.08318
3.07217	3.23466	3.37811
3.24359	3.3262	3.1132
3.17215	3.46819	3.16617
4.45681	3.10749	3.00982
3.99258	3.33376	2.89604
2.94621	3.45701	3.18834
3.96003	3.46084	3.16978
3.16093	3.33453	3.278
3.6306	3.24852	3.21611
3.45401	3.31823	3.52248
4.1057	3.36447	3.19945
3.51823	3.43297	3.22404
3.02989	3.36172	2.92273
2.86765	3.22964	3.23383
2.91636	3.22584	3.0414
3.49144	3.16241	3.12369
3.13385	3.43315	3.22989
3.00098	3.62811	2.91662
3.17786	3.10414	3.18502
3.01716	3.18914	3.03433
4.02304	3.51732	3.02256
3.48099	3.28951	3.32749
2.99784	3.4609	3.03582
3.02401	3.11673	3.25817
2.9904	3.33043	3.24674
3.83367	3.35184	2.85525
3.48694	3.33866	2.97817
2.843	3.5076	3.4683
3.25231	3.52075	3.21584
3.19407	3.43959	3.10743
3.15507	2.95258	3.04209
4.12352	3.21541	2.99163
4.10226	3.11586	3.42942
3.13121	3.24305	3.11891
2.94781	3.58113	3.25069
2.86623	3.38956	3.19353
3.88727	3.16307	3.43092
2.91193	3.35845	3.13436
3.52456	3.64632	3.35544
3.57341	3.38211	2.95577
3.81307	3.41592	3.40316
3.09468	3.44375	2.85512
3.20974	3.49467	3.02413
3.50541	3.21831	3.06632
2.92321	3.24381	3.16253
3.13644	3.21771	3.14141
3.20575	3.51667	3.12259
2.96941	3.61161	3.40459
3.31452	2.95908	3.27326
3.14355	3.582	3.30368
3.47967	2.99074	3.13886
3.88242	3.33971	3.2685
3.90974	3.00817	3.21912
3.0128	3.07636	3.05765
3.20462	3.08115	3.01818
2.96173	3.48158	3.44717
3.26647	3.38645	3.35395
2.99815	3.58663	3.20708
3.40598	3.54131	3.14847
3.21707	3.31791	3.21267
2.93135	3.43967	3.31906
3.2832	3.46306	3.38261
3.63878	3.309	3.00333
3.00851	3.40478	3.01772
3.39117	3.29231	3.01307
4.26317	3.36728	3.45756
3.27799	3.33574	2.84471
3.91631	2.98061	3.16823
3.64931	3.22353	3.38876
2.91495	3.46237	3.09517
3.61845	3.42007	3.16523
3.26193	3.21258	3.5013
2.9362	3.1423	2.9061
3.07427	3.22996	3.1542
2.90909	2.97423	3.28393
3.18564	3.3649	3.12207
3.44332	3.11025	3.12223
2.85312	3.42602	3.22315
3.14668	3.42172	2.99903
3.00742	3.24762	3.18893
3.55157	3.4298	2.88102
3.03974	3.31599	3.07085
4.05488	3.69165	3.41438
2.88027	3.12341	3.10191
3.23291	3.32991	3.19265
3.00238	3.58819	2.93451
3.0383	3.22394	3.26349
3.51712	3.49875	3.39922
3.11071	3.38506	2.9594
2.8424	3.36606	3.11706
3.50581	3.43699	2.84391
3.15649	3.18524	3.15995
2.85956	3.4201	3.18887
3.43587	3.28461	3.50288
2.94071	3.37941	3.07438
3.95056	3.40281	3.22153
2.8911	3.3122	3.32105
2.92102	3.28435	2.90093
3.3179	3.58089	2.86849
3.1895	3.3536	3.01945
2.94155	3.15647	3.28244
2.92327	3.36716	3.42199
3.01765	3.4679	3.42924
2.97327	3.16472	2.87667
2.90025	3.47827	3.27605
3.84616	3.47848	3.16971
3.85868	3.13763	3.3362
2.89445	3.50173	3.02506
3.2091	3.28946	3.08408
2.94452	3.2268	3.11436
3.0756	3.17427	3.10104
2.86155	3.50044	3.03651
3.21009	3.37737	3.14782
3.32537	3.00999	3.34
3.18399	3.45296	3.33352
3.97532	3.61077	2.9729
3.5888	3.2822	3.50909
2.91041	3.43659	3.34087
3.62116	3.34555	3.22732
4.01911	3.14053	3.34429
2.93379	3.25801	3.14628
3.33469	3.10101	2.97004
3.09088	3.33673	3.00722
3.29044	3.41077	3.13811
3.46343	3.4148	3.13784
3.54975	3.276	3.06054
2.93137	3.52247	2.95105
4.09116	3.37356	3.26247
3.42889	3.32862	2.89314
3.10461	3.07613	3.03053
3.37731	3.38016	3.17436
3.36464	2.85037	2.88401
3.40556	3.35476	3.36858
3.00278	3.26465	2.9049
3.02629	3.11548	3.02273
3.42355	3.65075	3.21201
3.86947	3.22208	3.55594
2.90335	3.32969	3.08554
3.12816	3.43379	3.36679
3.55606	3.14723	3.23447
3.62237	3.36434	3.54281
3.01077	3.25055	3.22852
2.87819	3.25663	3.18853
2.88161	3.14358	2.86623
3.43577	3.2027	3.10791
3.82222	3.03812	3.31242
3.25502	3.41944	3.29924
3.65608	3.31169	3.2283
3.08689	3.18477	3.02876
3.60086	3.59586	2.98358
4.04821	3.55619	3.22259
2.9413	3.45813	3.03557
2.9165	3.32555	2.93278
3.4316	2.84658	3.20731
3.91339	3.24617	3.23826
3.57317	3.54548	3.42889
4.01074	3.19578	3.17359
3.35922	2.8796	3.07193
2.89545	3.38251	3.29981
3.29367	3.52341	2.85455
3.36974	3.36358	3.08543
3.55699	3.06952	3.39129
3.42864	3.09042	3.30529
3.19305	3.0941	2.88021
3.04344	3.28966	3.30818
3.92963	3.44075	2.88426
3.03042	3.13153	3.01261
3.41862	3.69201	3.25076
3.81577	3.68729	2.99729
3.09829	3.40779	3.2537
3.21865	3.25827	2.89761
2.87927	3.28267	3.16276
4.10389	3.32164	2.96436
3.68667	3.21612	2.91528
3.11414	3.56929	3.1735
2.90605	3.54319	3.04524
2.85676	3.13821	2.92524
2.99497	3.52536	3.2456
2.86763	3.35392	3.29488
3.38803	3.46253	3.42046
3.22706	3.62059	2.87284
3.04498	3.38432	3.20223
3.05074	3.2494	2.87724
3.28248	3.22418	3.05797
3.66655	3.56324	3.06151
2.98029	3.50535	2.92198
3.1382	3.27303	3.13061
3.85696	3.50003	2.86321
3.22763	3.44933	3.42966
3.64762	3.21354	3.48874
2.9452	3.27513	3.37639
3.23459	3.33094	3.19288
2.96421	3.25532	3.47977
3.55624	3.3198	3.03937
3.44251	3.2426	3.26779
3.29661	2.97378	3.30742
2.84214	3.26513	3.19706
4.22676	3.6293	3.16401
2.90621	3.16896	2.99054
2.97539	3.31084	2.94812
4.1274	3.21352	3.02679
3.73559	3.54548	3.42712
2.89959	3.57168	3.37499
2.84139	2.89831	2.99478
2.84444	3.44157	3.0123
3.70519	3.4945	3.26025
2.86972	3.53882	2.93592
2.97961	3.05561	3.21804
3.1573	3.22807	2.86102
3.56428	3.58072	3.10629
2.94622	3.56998	3.26178
4.05964	3.35211	2.97901
3.32758	3.569	3.08226
3.30556	3.42027	3.13082
3.15421	3.4761	3.12792
3.18135	3.26748	2.89491
3.05135	2.93367	3.12441
3.14889	3.44266	3.23893
3.41689	3.44067	2.96699
3.14291	3.28083	3.02963
4.07003	3.28506	3.30257
4.10882	3.44853	3.11237
3.52786	3.38033	3.20722
3.34518	3.38731	3.20778
3.40211	3.40336	3.34827
3.09934	3.48696	3.28242
2.87767	3.22758	2.97277
3.36475	3.31371	3.25527
3.21867	2.86039	3.11434
2.94135	3.45467	2.9508
3.23539	3.12743	3.29199
3.24829	3.51539	3.0119
2.96698	3.30197	3.37397
3.56869	3.34577	3.36112
3.52327	3.40855	3.36489
3.32389	2.99687	2.96846
2.93467	3.50367	2.99286
4.26107	3.01289	2.92558
3.18843	3.45662	3.05996
2.99486	3.4284	3.28795
3.15408	3.36933	3.07194
3.14022	3.17934	3.05699
3.83136	3.2299	2.91796
2.89107	3.61325	3.05892
2.89234	3.46336	3.10376
3.37523	3.39815	2.88242
4.0474	3.16894	3.1715
4.12873	3.46147	3.27114
3.07304	3.33631	3.16795
2.92768	3.4028	3.15084
2.88532	3.50447	2.89075
2.86794	3.61422	3.37797
3.02643	3.68302	3.43002
3.97113	3.25297	3.13657
2.93238	3.37964	3.20721
3.9521	2.99278	2.96259
4.00376	3.1857	3.16453
2.85626	3.47605	3.26533
3.82899	3.10527	3.09874
3.2439	3.62041	2.99138
3.89658	3.38049	2.84358
3.39797	3.09846	2.86383
2.874	3.09821	3.25083
2.86263	3.30722	2.85811
2.99233	3.40592	3.11221
3.03294	3.03393	2.85938
2.84312	3.51855	3.06988
3.53457	3.36031	3.1386
2.99466	2.97578	3.45343
3.80463	3.47154	3.31494
3.64196	3.61465	3.06085
3.97638	3.35616	3.25001
3.17553	3.49875	3.22193
3.15562	3.08754	2.87015
3.08171	3.51611	3.13425
2.90874	3.1047	3.2921
4.20326	3.37401	2.97157
3.29159	3.06491	2.96229
3.36344	3.25919	2.85039
3.574	3.29714	2.86898
3.05079	2.92734	3.21623
3.29587	3.17573	3.32362
3.43559	3.37895	2.91455
3.40236	3.43436	2.85997
2.86969	3.02273	3.46637
2.88526	3.30871	3.08297
3.16389	3.46474	3.46699
3.04108	3.37667	3.1597
2.95613	3.33268	2.90518
2.94558	3.28276	3.34744
3.5641	3.10518	3.08051
2.99331	3.47914	3.13858
3.07489	3.13576	3.05007
3.22495	3.44871	3.00232
2.87111	2.92583	2.9367
2.85372	3.31532	3.16092
3.90982	3.0902	3.173
2.88099	3.36105	3.37693
3.06226	3.57663	3.14831
2.87288	3.35903	3.24335
2.86452	3.39136	2.97059
3.09523	2.89627	3.12064
2.93127	3.25011	3.20506
2.8602	3.41936	2.95078
3.03172	3.11082	3.18193
2.87888	3.43987	3.34692
3.02838	3.49632	3.00878
2.87649	3.34415	2.91606
3.90396	3.45277	3.10149
3.45967	3.18067	3.1628
3.1358	3.35858	3.17434
2.96687	3.01041	3.04666
3.26838	3.16247	3.27308
2.97662	3.29423	3.16884
3.25855	3.42416	3.16594
2.94305	3.58085	2.98826
2.87902	3.23869	3.36041
3.10069	3.2666	3.3769
3.41594	3.26688	3.16955
2.96867	3.26757	3.12864
3.8128	3.47581	3.14088
3.26377	3.35469	3.0273
2.89565	3.00483	3.52442
3.12885	3.47182	3.66035
3.13867	3.17313	3.32495
3.85462	3.41618	3.27867
4.01559	3.22727	3.59944
2.84224	3.34973	3.29564
3.02924	3.38862	3.09283
2.99505	3.34543	2.8736
3.55287	3.46154	3.19291
3.56014	3.18021	2.97628
3.04397	3.55723	3.49458
3.42023	3.4241	3.33055
3.49394	3.64388	3.20982
3.08754	3.26413	3.2956
3.38915	3.40388	3.22847
2.96536	3.36685	3.18283
3.31412	3.33885	3.19438
4.0023	3.24771	2.86823
2.85032	3.32798	3.06366
2.96553	3.51342	3.02966
3.01008	3.53393	2.87236
3.26206	3.47985	3.16324
3.13904	3.42983	3.03933
2.85269	3.12106	3.32059
3.42206	3.56494	3.33054
3.01003	3.58768	3.31983
3.58246	3.48388	2.91356
2.86232	3.41974	3.11246
3.44597	3.36416	3.26892
3.26637	3.30238	2.86587
2.94528	3.64876	3.24047
3.00049	3.36301	2.98829
4.12571	3.43847	3.13857
2.86578	3.34135	3.26316
3.02307	3.34343	3.30576
2.84987	3.75006	3.32506
3.41962	3.09592	3.21649
3.52287	2.86953	2.96775
3.0804	3.46015	3.11396
3.25423	2.94782	3.14173
3.56065	3.52824	3.44651
3.39321	3.27122	3.00251
3.26117	3.37335	3.00532
3.0838	3.18018	3.33809
3.46036	2.90012	3.24795
4.19028	3.10731	3.19594
3.39451	3.34287	3.00529
2.87868	2.92837	3.32945
3.79737	3.43258	3.23609
2.93689	3.62317	3.04558
3.79009	3.4303	3.17722
3.14757	3.29728	3.45518
2.90079	3.32154	3.17828
3.97248	3.15334	3.25681
3.50177	3.40503	3.48255
2.94462	3.46957	3.14259
3.31946	3.31941	3.37113
2.90434	3.48312	2.91933
4.1544	3.04356	2.93905
3.32529	3.34155	3.41529
3.0121	3.33335	2.91396
3.64676	3.32871	3.4285
3.11096	3.39436	3.08952
3.16845	3.27144	3.14145
3.71374	3.12338	2.89676
2.92991	3.24756	3.23407
3.04066	3.31573	3.28298
3.63803	3.40266	2.98625
3.9826	3.17535	3.22254
2.87217	3.41551	3.06684
3.04167	3.44286	3.10626
3.5781	3.69649	2.95456
3.45839	3.40287	2.88582
3.0174	3.3983	2.86229
3.0276	3.38623	3.13544
4.15186	3.19763	3.51892
2.94279	3.27824	2.94592
3.1218	3.05315	3.23577
3.07109	3.35602	3.07105
3.23085	3.42333	2.92553
3.4324	3.45591	2.93105
3.09832	3.52631	3.16541
2.86533	3.51126	2.8954
4.08593	3.43659	3.45618
3.17847	3.19981	3.53436
2.89811	3.65495	3.3409
2.95662	3.21118	3.23751
3.15268	3.50709	3.06909
2.94541	3.57773	3.11552
2.85572	3.22424	3.00934
3.15715	3.38436	2.89893
2.93879	3.522	3.34826
3.20187	3.37142	3.05591
3.60783	3.43251	2.99374
3.2873	3.29115	3.04916
3.63771	3.40028	3.167
3.00477	3.44303	3.05644
3.64912	3.1368	3.01813
2.99974	3.66512	3.4938
2.99067	3.33731	3.03527
3.53115	3.68332	2.96258
3.01715	2.90738	3.09356
3.18772	3.44993	2.98744
3.94024	3.4789	3.50859
3.19741	3.45874	3.25444
2.98968	3.35697	3.04506
3.59139	3.32894	3.15247
3.69015	3.37183	2.94135
3.4589	3.26234	2.88405
2.97478	3.37793	2.89378
2.86476	3.13108	3.31323
3.38124	3.26191	3.26932
4.08368	3.36822	3.26059
3.55867	3.24631	3.1403
2.88827	3.3943	3.32862
3.36346	3.29377	3.41797
2.88054	3.36025	3.36984
2.98965	3.41215	3.13801
3.10423	3.49133	3.08595
2.99096	3.47342	3.26215
3.40949	3.52475	3.12938
3.0569	3.15701	2.85894
3.76967	3.18782	2.88764
3.39367	2.86209	3.07427
3.01549	3.16043	2.99385
3.36926	3.18665	3.23877
3.2093	3.17063	3.43387
3.15935	3.00893	3.21896
3.68304	2.8981	3.49805
2.97515	3.57493	2.98426
3.46357	3.30573	3.00224
3.10253	3.48925	3.14213
3.3404	3.5796	3.50493
3.1161	3.33898	3.25229
2.92362	3.30775	3.26668
3.23088	3.46634	3.4953
3.29896	3.14529	3.22086
3.49957	3.0469	3.25713
2.93409	3.42845	2.95432
3.63526	3.31605	3.06843
3.1802	3.15109	3.55449
2.91166	3.26673	3.27787
3.62936	3.0911	3.36964
3.50043	3.15275	2.91082
4.10225	3.41851	3.35604
2.9981	3.34305	3.21352
3.11698	3.45071	2.98762
3.68619	3.47227	3.27076
3.3828	3.44112	3.08764
3.63544	3.39121	3.33539
3.47351	3.4906	3.26644
3.4651	3.33578	3.12989
3.25437	3.13819	2.85144
3.40037	3.40053	3.28172
3.35935	3.3401	3.46092
3.29122	3.16669	2.99551
3.4035	3.47194	3.16143
2.94082	3.31002	3.05061
3.01796	3.31247	3.27429
2.97325	3.2172	2.91102
2.88496	3.4406	3.18873
3.04611	3.34361	2.90554
3.64566	2.91062	3.46588
2.96366	3.26228	3.16511
4.04704	3.50401	3.36145
3.09094	3.18314	3.04976
2.97571	3.38478	2.97361
3.21924	3.00687	3.55152
3.41057	3.18559	3.45088
3.37024	3.35469	3.10363
2.84752	3.48994	3.04887
2.86473	3.65605	3.29927
4.27518	3.07657	3.04651
2.93487	3.03649	3.18275
2.92763	3.30492	3.09257
3.45177	3.54378	3.08254
3.37482	3.19699	3.46564
3.28631	3.3075	3.0945
3.11467	3.74586	2.9546
3.39175	3.65677	3.07005
3.1885	3.50214	2.90523
2.98383	3.36231	3.26303
3.1204	3.38004	3.21622
2.92858	3.68036	3.40934
2.90975	3.41351	3.20773
3.78679	3.10285	3.43901
3.11894	3.33916	3.11373
3.19148	3.43214	2.97949
3.37614	3.23747	3.05874
3.29462	3.40951	2.86275
2.9475	3.22804	2.94083
3.05937	3.26343	3.06467
3.05254	3.22768	3.13397
3.85869	2.85306	3.4075
2.97144	3.52583	3.37817
3.08616	3.45272	3.36173
3.04077	2.92916	3.37636
3.4127	2.98464	3.10083
3.37993	3.34105	2.88416
2.9595	3.60986	3.26967
4.19745	3.47605	3.4157
2.90208	3.31522	3.37425
3.45927	3.49481	2.92583
3.87472	3.13541	3.17056
3.21843	3.14194	3.04066
3.51522	3.07591	2.97439
3.93671	3.48728	3.55807
3.41111	3.2954	2.98478
3.39978	3.29261	3.11203
3.34203	3.10936	2.97992
3.79613	3.2224	3.07707
3.70552	3.32227	2.9435
3.89732	3.54158	3.18373
3.03657	3.00107	3.48731
2.93225	3.40801	2.90723
3.30106	3.54773	3.15615
3.18476	3.04553	3.06859
2.90806	3.41975	2.92563
3.18067	3.38566	3.09908
3.36268	3.18697	3.19295
3.35091	3.36446	3.27935
3.00394	3.59616	3.27887
3.6259	3.30383	2.89648
3.02219	3.23367	2.85037
3.26547	3.45776	3.07107
4.19274	3.70123	3.4188
2.90342	3.20772	3.07502
2.96202	3.24722	3.0071
3.09647	3.45987	3.23426
3.47239	3.38368	3.29526
2.86727	2.90475	3.17981
2.97629	3.40666	3.13175
3.5431	3.32315	2.88153
3.2703	3.41798	3.12433
3.30287	3.101	2.9322
2.8812	3.42314	2.84242
2.84806	3.14052	2.99605
3.52226	3.3995	3.35281
3.03163	3.42023	2.91049
3.45651	2.8755	3.14028
3.80922	3.41081	3.16831
3.0977	3.50764	3.15729
2.9155	3.21559	2.9847
4.10274	3.49079	3.12769
3.26467	3.26615	2.95481
3.91643	3.19905	3.29267
3.5793	3.40374	3.41595
2.84405	3.44113	3.41285
3.48508	3.43138	3.2544
3.86708	3.30599	2.93883
2.90585	3.40011	2.92271
2.97803	3.43692	3.01686
3.44222	3.09781	2.96747
2.97635	3.23658	3.1768
2.93919	3.49822	3.28357
3.09582	3.25439	3.53718
2.99603	3.37848	3.0606
3.35183	3.24893	3.14182
4.14586	3.38603	3.08318
3.93226	3.48349	3.34998
2.84807	3.20734	3.09341
3.22903	3.54038	3.32657
3.33825	3.66774	3.38653
2.95169	3.36507	3.25115
4.04438	3.52769	3.30233
3.52681	3.12618	3.16762
3.20472	3.46892	3.14982
3.82683	3.39539	3.09036
3.40287	3.28507	3.05737
3.40735	3.53685	3.23492
3.00549	3.15732	3.23664
3.28771	3.3787	2.87154
3.02032	3.37057	3.18352
3.3046	3.39153	3.1385
4.06369	3.35864	3.45388
3.54514	3.24324	2.94252
3.43602	3.56013	3.29632
2.8702	3.23695	3.0604
2.86717	3.20814	3.0797
3.58812	3.0445	3.29013
3.24045	3.28818	3.10933
2.84911	3.41091	3.29384
3.62764	3.23529	3.12658
3.06487	3.11398	3.1286
2.98216	3.45809	3.06368
3.40742	3.29166	3.3381
3.07381	3.3529	3.25273
2.90603	3.05613	3.41894
3.46059	3.28065	2.84365
3.45908	3.57431	3.04616
2.93339	3.34836	3.03482
3.06734	3.06467	2.96274
3.17196	3.27178	3.39176
2.98684	3.37717	3.06909
3.14028	3.20369	2.8913
4.183	3.18042	2.93304
3.10814	3.49108	3.29533
2.95918	3.65527	3.51535
2.94174	3.35353	3.04724
3.56438	3.38515	2.91457
2.85716	3.14726	3.01137
3.39718	3.25296	3.0521
3.13416	3.31386	3.3773
2.94795	3.29119	3.56741
3.33715	3.43416	2.94111
2.98666	3.38025	3.5674
2.90412	3.29727	2.99607
2.8467	3.28117	3.13599
3.43574	3.0321	3.18245
4.05748	3.58399	3.28031
3.07322	3.11939	2.897
3.80116	3.34342	3.20941
4.10891	3.5502	3.20029
2.92005	3.19655	3.32158
3.94231	3.37902	3.38856
3.05281	3.07814	3.08323
3.92527	3.49334	3.06749
3.3976	3.23089	3.17517
3.72594	3.39015	3.49104
3.03095	3.02064	2.93729
3.19019	3.52831	3.46108
2.85815	3.44619	3.11437
2.95422	3.21265	3.12101
3.77086	3.40477	2.86831
3.34192	3.47774	3.34841
4.11904	3.28569	3.37148
3.44812	3.35815	3.11652
3.18252	3.42518	3.20928
3.49809	3.20964	3.37185
3.16491	3.29655	3.39218
2.99382	3.24707	3.1312
3.30462	3.35813	3.45668
2.92429	3.28887	3.33005
3.25688	3.48723	3.26767
3.84742	3.52456	3.36573
2.89108	3.44908	3.27362
3.45263	2.97707	3.15708
3.95927	3.26823	3.02326
3.34562	3.27378	3.14731
3.52846	3.40354	3.26165
3.12636	3.32015	3.14737
3.72824	3.47415	2.86831
3.45426	3.54124	3.17447
2.91359	3.05989	3.08635
3.98871	3.41791	2.95192
2.86516	3.48192	3.03077
3.12368	3.36209	2.9575
3.58866	3.36826	3.2492
3.0695	3.30967	3.26063
3.49778	3.31574	3.19722
3.62234	3.30037	3.05998
3.12571	3.30621	3.33963
3.35545	3.03879	3.24557
3.26036	3.58589	3.06201
3.77978	3.43782	3.14378
2.84732	3.44788	3.38776
3.28854	3.47486	3.17767
3.22904	3.19444	3.09153
3.96693	3.40122	3.00506
2.98914	3.47012	3.02078
3.10453	2.99691	2.86499
3.0727	3.51918	3.13154
4.22827	3.3083	3.10804
4.14693	3.08695	3.17489
3.40493	3.21733	3.15728
2.90304	3.36659	2.99839
2.84792	3.39098	3.36367
3.52248	3.40361	3.42532
3.30207	3.487	2.97879
3.89655	3.24045	3.31243
4.16981	3.3019	3.44196
3.59402	3.11594	3.04583
3.34032	3.52394	3.28928
3.16341	3.29174	3.24345
3.48784	3.21456	3.57291
3.44668	3.24542	3.30055
3.45757	3.37087	3.24446
3.10173	3.05437	3.13107
3.19977	3.28438	3.12103
2.8565	3.16081	2.89919
2.86176	3.13088	2.84298
3.73996	3.28446	3.08641
3.20155	3.07959	3.23472
2.8617	3.30205	3.18575
3.06843	3.23789	3.07909
2.92649	3.30992	3.53757
2.89652	3.21893	3.15872
4.07175	3.39187	3.43915
3.39438	2.85894	3.32627
2.89267	3.06417	3.02389
3.01083	3.66428	2.86043
2.90683	3.19185	3.05226
2.96589	3.20803	3.20773
3.18403	3.42029	3.10863
2.86767	3.24811	3.13467
3.57096	3.2553	3.39336
3.2032	3.60356	3.24148
2.90581	3.4487	3.27479
3.3863	3.21297	3.4292
2.88264	3.20754	3.14961
2.99115	3.49623	3.12392
3.60431	3.29437	3.16948
2.88063	3.74571	2.86897
2.89092	3.25275	3.22183
3.11026	2.95438	3.3413
3.46694	3.31486	3.5075
3.35263	3.33955	3.33141
3.40244	3.17837	3.10191
3.75227	3.61642	2.96153
3.26341	3.12636	2.87647
4.00118	3.32388	2.99413
3.65915	3.36811	3.46947
4.06196	3.38254	3.37818
3.13799	3.087	3.12679
3.15138	3.55384	3.13412
3.44272	3.39542	3.00287
3.01582	3.26473	2.95861
3.21904	3.60149	3.24753
2.98731	3.31861	3.00101
2.96415	3.38226	2.849
3.04021	3.32473	3.08757
3.43685	3.41967	3.3255
3.37038	2.92684	3.37667
3.63611	3.46985	2.92377
3.44552	3.27175	3.28331
3.98118	3.5144	3.28341
4.05362	3.33703	2.89129
2.87642	3.54831	3.0899
3.2695	3.26556	3.02922
2.94478	2.98195	2.89178
3.07047	3.34659	3.29365
3.17711	3.3884	2.91125
3.063	3.5285	3.46061
3.0073	3.59534	3.32407
2.89529	3.40103	2.84946
4.00738	3.37294	3.24019
2.9609	3.34504	3.05209
3.26941	3.22631	4.08062
3.47707	3.55204	3.65139
3.46697	3.03544	3.33324
2.892	3.49109	3.17536
2.95193	3.21723	3.07401
3.54897	3.24363	2.87915
3.22497	3.37483	2.97199
3.97777	3.25327	2.91622
2.88897	3.245	3.03379
3.05262	3.35616	2.90579
3.04934	3.63155	3.10508
2.84691	3.14178	3.28455
2.91924	3.29799	3.12083
3.51617	3.33717	3.09793
3.4276	3.22319	3.60821
3.36721	3.42212	3.48721
3.07353	3.31214	3.32359
3.34518	3.0333	2.92813
2.9642	3.35796	2.99791
3.52447	3.12945	3.02291
3.45233	3.38668	3.49243
3.28084	3.3164	3.0422
3.26878	3.19696	2.93849
3.46815	3.2862	2.87937
3.35301	3.4288	3.0408
3.0443	3.38509	3.18446
4.10812	3.04831	3.08704
2.89734	3.47468	3.19368
2.85172	3.3976	3.12486
3.08317	3.26331	3.35618
4.23502	3.53657	2.99055
2.93367	3.35256	3.31344
3.21496	3.4283	3.30918
2.97723	3.26996	3.44655
2.89192	3.43938	3.3273
3.44186	3.52052	3.6136
3.0446	3.37539	3.19626
4.01285	3.44644	3.44933
2.86516	3.29383	2.98056
2.92743	3.46434	2.95908
3.17845	3.49698	3.44038
3.57611	3.35999	3.08723
4.1035	3.47567	3.25395
3.01557	3.07677	3.16767
3.6221	3.16932	3.07884
2.9298	3.09218	3.3146
3.32914	3.58558	3.21117
3.70717	3.32561	2.89297
2.93596	2.98753	3.20755
3.36763	3.16711	3.25916
3.1695	3.4631	3.22733
3.96817	3.35483	3.0379
3.10503	3.5037	3.11017
2.84419	3.13883	3.30536
2.84673	3.22953	2.95558
3.09437	3.25433	3.00537
3.38496	3.48649	3.30849
2.94044	3.12752	3.56184
3.33748	3.41996	3.31074
3.59894	3.12166	2.94992
3.35898	3.58975	3.26057
4.07528	3.32126	3.19202
4.0385	3.62387	3.1134
2.99514	3.28154	3.16597
2.9807	3.16731	3.18736
3.99227	3.46568	3.18969
4.17882	3.36802	3.4541
3.10029	3.04961	3.01615
3.22654	3.47112	2.98804
3.4066	3.33346	3.37168
3.29127	3.4285	2.9684
2.94982	3.38294	3.59087
3.53086	3.3069	3.15008
3.5851	3.20919	3.38043
4.03132	2.99775	3.11156
2.9325	3.42236	3.09802
2.96309	3.30691	3.39955
2.96994	3.38103	3.04535
3.08419	3.68907	3.19426
3.77448	3.45963	3.59686
3.69506	3.48834	3.03904
3.42771	3.27308	3.12033
3.07175	3.36912	3.45308
3.82691	3.45354	3.3198
3.77116	2.95311	3.08478
3.22455	3.12132	2.93333
3.40802	3.30587	3.12824
3.45542	3.51563	3.23002
3.42669	3.31089	3.07654
3.90009	3.62075	3.1968
2.85402	3.26959	2.97231
3.30787	3.46483	2.99118
3.05795	3.56041	3.51317
3.62403	3.64619	3.25562
2.85399	3.47239	3.28596
3.14388	3.43671	3.0501
2.90644	3.64445	3.15678
2.89485	3.23544	3.07707
2.85802	3.54715	3.20363
3.45358	3.45054	3.05992
3.35092	3.28662	3.3844
2.9453	3.07433	3.21514
3.46267	3.53351	3.0817
2.99437	3.23194	3.20711
3.31168	3.27428	3.09767
3.02857	3.64485	3.07604
3.92857	2.93382	3.29596
3.07772	3.30043	3.14762
2.89101	3.45458	3.61072
2.86995	3.31815	3.07112
3.33502	3.14362	3.03241
3.00626	3.70841	3.029
3.02078	3.41718	3.16924
4.15544	3.50663	3.37328
4.05926	3.08389	2.88814
4.16038	3.51516	3.29955
3.90425	3.30018	3.03891
2.92485	3.53563	3.27485
3.15644	3.25183	3.12216
2.84179	3.23201	3.30087
4.14022	3.44007	2.9458
2.87429	3.33091	3.00894
3.90919	3.02879	3.2582
3.35567	3.45155	3.30124
2.98496	2.85105	2.92927
2.85705	3.50523	3.32591
3.37698	3.36048	3.25921
3.15081	3.37329	2.92538
3.8129	2.90207	3.01828
4.00777	3.40014	2.99159
4.46163	3.59145	3.08458
3.29595	3.30085	3.55198
3.00985	3.51817	2.99848
3.27998	3.00556	3.44904
3.46436	3.32648	3.2037
2.85553	3.33871	2.98204
3.02823	3.46041	2.90675
3.39259	3.37495	3.08054
3.61487	3.46728	3.3515
3.40275	3.60777	3.02972
3.56147	3.53806	2.95295
4.0319	3.57046	2.88106
3.9973	3.44467	3.18083
3.94868	3.26461	2.93755
3.97194	3.52422	3.22157
2.8889	2.98661	3.23934
2.91668	3.16058	2.9806
4.00622	3.27975	3.21541
3.56848	3.15804	2.96941
3.59644	3.33847	3.4772
3.27543	3.51323	2.99764
3.14409	3.21057	3.05433
2.88604	3.33294	3.07765
3.00981	3.08954	3.26875
2.88384	3.01782	3.14642
3.12012	3.3712	2.97281
3.44606	3.30388	2.90677
3.36939	3.39631	3.03657
3.31698	3.32802	3.31991
2.96543	3.26994	2.96725
3.51075	3.4483	2.90994
2.97331	3.22077	3.04415
3.93762	3.49576	3.59146
2.94568	3.2205	3.22698
4.22085	2.95259	3.02246
3.27296	3.22639	3.27187
3.41591	3.39057	3.0804
3.91146	3.34693	3.10107
4.15687	3.42816	2.94179
3.31699	3.06999	3.49103
3.15246	3.70519	3.3269
3.69582	3.30785	3.42179
3.15895	3.45742	2.90285
2.95993	3.30824	3.45631
3.39826	3.10582	3.28638
3.91327	3.50548	2.87165
3.22648	3.44053	2.9967
3.14924	3.19027	3.04321
3.38925	3.50818	3.19615
3.65885	3.17348	3.5164
3.27097	3.53572	3.16374
3.14829	3.41278	3.16582
3.51266	3.46075	2.92646
3.41089	3.10724	2.88079
2.9799	3.56744	2.87738
3.26215	2.96407	3.21528
3.01928	3.22664	3.02743
3.87945	3.3446	3.07686
3.28755	3.55403	3.4232
3.21901	3.33778	3.05505
3.86163	2.94949	3.47316
3.61586	3.589	3.27782
3.71559	3.31793	2.85812
2.96509	3.35831	3.53115
4.16962	2.99122	3.23296
3.43978	3.18567	3.09568
3.29114	3.41863	2.9827
3.51719	3.07188	3.47998
3.42623	3.31362	3.22653
3.25287	3.08523	2.99153
3.29038	3.04493	2.90733
3.30879	3.37358	3.18006
3.09214	3.5925	3.19181
3.63465	3.49422	3.33926
3.00438	3.43974	2.9886
4.20633	2.9963	3.01228
3.29575	3.35131	3.26942
3.1196	2.95749	3.26613
3.04981	3.33419	2.9298
2.90576	3.43207	2.96123
2.92078	2.96218	2.999
3.11128	3.35864	2.91286
3.96991	3.19141	2.86959
3.19445	3.23157	3.14205
3.03114	3.26722	3.22197
3.37494	3.17908	3.11465
3.04301	3.27446	3.21806
4.05379	3.33903	3.11807
3.1297	3.36948	3.44192
3.49247	3.00651	3.08863
3.67805	3.05421	2.92416
3.19306	3.22696	3.29893
3.64877	3.33567	3.49459
3.86004	3.59556	2.94055
4.11846	3.30977	3.38832
3.48188	3.58457	3.25599
3.14912	3.32006	3.40418
3.02691	3.23636	3.1505
3.12737	3.27424	2.95537
3.09931	3.28637	3.25422
2.86455	3.40172	3.32733
3.21516	3.29275	2.9277
4.10094	3.37077	3.23677
3.16217	3.62366	3.5293
2.88297	3.58893	2.84262
2.97254	3.0878	3.01758
3.03402	3.14139	3.44946
2.9336	3.28769	2.85409
3.47523	3.36342	3.591
4.05316	2.99268	3.19927
3.32883	3.09175	3.02324
3.30802	3.42367	3.63699
3.26007	3.40281	3.13456
2.85376	3.31755	3.11057
2.90836	3.16883	3.01883
3.64534	3.50691	3.34777
3.42177	3.32929	3.27516
3.36542	3.51092	3.03313
2.86114	3.50108	3.06989
3.26205	3.33104	3.22728
3.5416	3.47185	3.15086
2.95649	3.53031	2.96414
3.42298	3.12948	3.09018
4.07962	3.27443	3.11739
2.95812	3.4421	3.25948
3.27645	3.18846	2.84304
3.11523	3.26055	3.03527
3.40742	3.34003	3.29274
3.18204	3.50603	3.44364
3.20423	3.29805	3.30764
3.19102	3.22007	3.06787
3.32127	3.12029	3.10586
3.59029	3.61488	3.1981
3.97559	3.04823	3.35152
3.27018	3.36673	3.28677
3.04589	3.47205	2.95874
3.16344	3.30958	2.97216
3.27338	3.27614	3.22989
3.0854	3.43283	2.90037
3.40005	3.50647	2.95349
4.11339	3.2428	3.3392
3.31596	3.3197	3.03246
4.04819	3.43516	3.38626
3.06106	3.48292	3.29383
3.28656	3.71697	3.26875
3.05044	3.2886	3.45342
3.69414	2.9978	3.17805
4.27004	3.54831	3.16742
3.65755	3.58352	3.50933
3.90358	3.42665	3.3365
3.32059	3.59478	3.19897
2.87571	3.49925	2.89094
3.89289	3.3734	3.30252
3.95184	3.28786	3.12372
3.68114	3.05974	3.04887
2.95848	3.62666	3.0973
3.28529	3.29502	3.03472
3.43278	3.10474	3.21732
3.27912	3.27235	3.13178
4.04061	3.20032	3.206
3.41489	3.37952	3.07135
2.85226	2.94527	3.01161
2.93866	3.41928	2.94757
3.0846	3.32995	3.0456
2.98146	3.42069	3.22234
3.96881	3.37563	3.28439
3.98184	3.05614	3.27677
4.0069	3.45633	2.89161
3.37537	3.14979	3.36369
3.80411	2.96695	3.45033
2.95912	3.49161	3.27301
3.86523	2.94624	3.26571
4.22504	3.25581	3.22075
3.31238	3.41218	2.93455
3.29754	3.57869	3.50002
2.88973	2.93349	2.94709
2.97304	3.28323	3.45707
3.00922	3.43297	2.89455
3.85029	3.02141	3.37418
3.00572	3.26713	3.56718
3.36771	3.42485	3.05554
2.94474	3.14762	3.11074
3.874	3.67692	3.16334
2.87649	3.05318	2.91208
3.95087	3.63467	3.38532
3.11568	3.12529	3.35486
3.55138	3.37039	2.9368
2.92795	3.52964	3.26864
3.26257	3.56449	2.91022
3.15773	3.56057	3.11928
2.94461	3.44529	3.09871
2.89953	3.55537	3.16974
2.85424	3.43554	2.91171
3.32668	3.48711	3.02716
2.90345	3.12495	3.23786
2.9818	3.44958	2.89545
3.2546	3.42396	3.00641
3.98082	3.35326	3.20071
3.29283	3.49767	3.07578
3.93943	3.30846	2.99019
3.19936	3.29852	3.51297
2.93972	3.11566	3.12179
2.88657	3.17705	3.49869
3.62539	3.26015	3.08799
3.00867	3.02884	2.91691
3.84695	2.97607	3.29222
3.20118	3.43671	3.41361
3.36633	3.08865	3.241
3.80428	3.05641	3.20703
2.92663	3.66027	2.96949
3.21718	3.10352	3.51721
3.30685	3.29296	3.10368
3.02514	3.60206	3.11139
3.05783	3.20596	3.04555
3.3178	3.42257	3.24658
2.98773	3.4784	2.95591
3.80644	3.36488	3.22388
3.70406	3.49967	3.12096
3.38366	3.14708	2.86438
3.41809	3.38972	3.22693
2.93722	3.42309	3.22812
2.85412	3.41247	3.00907
3.34285	3.46526	3.2146
2.90201	3.35398	3.50967
4.01312	3.31063	3.25582
2.90848	3.32575	3.28604
4.02141	3.32371	3.55592
3.26321	3.24328	3.06768
3.75645	3.12615	2.96119
3.06178	3.44532	2.92655
3.16213	2.92746	2.87675
2.84955	3.55077	3.55013
3.16347	3.59298	3.1689
3.56541	3.39349	3.14109
3.12135	3.47957	3.18921
4.17033	3.30458	3.38849
3.11448	3.26156	3.07036
3.98123	3.63376	3.09548
3.15042	3.547	3.36042
3.36159	3.52007	3.39743
3.4664	3.64512	3.14153
3.07487	3.11321	3.01529
2.84178	3.28526	3.08323
2.9754	3.20479	2.84932
3.54018	3.27908	3.44035
2.89553	3.54319	2.93293
2.85567	3.41679	3.19713
2.95097	3.29173	3.51134
2.91153	3.12543	3.28848
2.84517	3.41091	2.85877
2.93665	3.4032	3.1781
3.06033	2.86389	3.1159
2.98946	2.9088	2.93232
4.1085	3.44923	3.10866
3.89103	3.29308	3.26661
3.86272	3.14784	3.11442
3.9153	3.52061	2.95809
3.36775	3.03712	3.3401
2.97843	3.422	3.30512
2.84322	3.60428	3.60481
3.93129	3.43937	2.93033
3.41544	3.0303	3.22266
3.47537	3.52701	2.94343
2.87281	3.28609	3.00387
3.4223	3.4106	3.12546
3.23393	3.17454	3.28122
3.95716	3.33851	3.0317
3.99215	3.33215	3.15319
3.90487	3.69641	3.36642
2.85723	3.52929	3.04914
2.99815	3.26328	2.90064
2.97266	3.48232	3.18203
3.02791	3.33724	2.90861
3.11698	3.22586	3.51917
3.24601	3.40005	3.26768
3.62407	3.15769	2.91377
3.12061	3.07813	3.22076
4.07585	3.47028	3.21129
2.90632	3.5951	2.91199
3.92997	3.12527	3.68138
3.00799	3.01368	3.13638
3.57653	3.31706	3.37473
2.9786	3.2716	3.42963
2.98288	3.51501	3.16267
3.35658	3.5636	3.09234
4.03464	3.21207	2.85801
3.49156	3.20111	3.0573
2.92629	3.50979	3.11587
2.91159	3.58719	3.08535
3.61699	3.40301	3.36917
3.09804	3.35181	3.08421
4.26631	3.45561	3.12548
3.01667	3.40801	3.43696
2.9438	3.52608	3.24739
2.98757	3.11153	3.02606
3.38092	3.40973	3.18107
2.92769	3.17617	3.2449
3.36149	3.65913	2.97266
4.00271	2.98826	3.16816
4.01224	3.16441	3.31915
3.26711	3.56589	2.8972
2.97272	3.03671	3.51168
2.90435	3.32237	2.88057
3.15959	3.27446	2.86444
3.40103	3.26992	3.43285
3.15407	3.47949	3.03282
3.25273	3.32699	3.03042
3.32362	3.32861	3.16934
3.65968	3.3853	3.3531
3.96868	3.30429	3.35471
3.2275	3.17367	3.00846
3.76134	3.503	3.06032
2.84323	3.26312	2.89154
3.55569	3.09379	3.07243
3.55073	3.32015	3.34537
3.07258	3.21635	3.34901
3.76965	3.16395	2.87447
3.55293	3.27491	2.85482
4.12188	3.44479	3.33727
2.91894	3.58002	3.49374
3.71614	3.44693	3.4337
4.00462	2.86158	3.00249
2.92898	3.44912	2.85738
2.92889	3.44979	3.21455
3.74449	3.63886	3.22647
3.56229	3.01696	3.01066
3.90851	3.59997	3.22073
2.92929	3.40447	2.87197
3.65934	3.61275	3.39957
3.25217	3.60251	3.11758
4.01562	3.30785	3.17298
3.66446	3.4873	3.3858
3.71222	3.32202	3.18359
3.12988	3.45563	3.1602
2.93371	3.14761	3.3031
2.95927	3.26025	3.0564
2.91352	3.23005	3.01473
4.12448	3.36082	3.20484
2.85889	3.03227	2.96469
3.85713	3.49031	3.19312
3.26414	3.08503	3.34424
2.95535	2.98491	2.89133
3.02707	3.27046	3.57855
[truncated: 22,353 more rows]

[truncated: 31 more sheets: Fig.1n, Fig.3b, Fig.3d, Fig.3e, Fig.3g, Fig.3h, Fig.4d, Fig.5m, Fig5n, Fig.5o, Fig.5p, Fig.8i, Fig.8j, SuppFig.1e, SuppFig.1f, SuppFig.1g, SuppFig.1i, SuppFig.1j, SuppFig.1k, SuppFig.1m …]
